# Supplementary material for: Human BRCA pathogenic variants were originated during recent human history
Source: Life Sci Alliance. 2022 Feb 14;5(5):e202101263. doi: 10.26508/lsa.202101263 (PMC8860097; doi:10.26508/lsa.202101263)
Supplement: Supplementary file 1 [file LSA-2021-01263_TableS1.xlsx]

## Sheet: Sheet3
Supplementary Table 1. Human BRCA variants used in previous evolution studies
A. Summary
Classes	BRCA1	BRCA2	Total (%)
Pathogenic	5	1	6 (5.4)
Benign/Likely benign	34	8	42 (37.8)
Uncertain significance​	45	2	47 (42.3)
Conflicting interpretations	12	2	14 (12.6)
not provided	1	1	2 (1.8)
Total	97	14	111 (100)
B. List of BRCA variants
cDNA	Protein	ClinVar classification	Reference
BRCA1
c.181T>G	p.C61G	Pathogenic	Lou et al
c.68_69del	p.E23fs	Pathogenic	Burk-Herrick et al
c.4327C>T	p.R1443X	Pathogenic	Burk-Herrick et al, Fleming et al
c.4065_4068del	p.E23fs	Pathogenic	Burk-Herrick et al
c.5266dup	p.Q1756fs	Pathogenic	Fleming et al
c.1030G>C	p.A322P	Conflicting interpretations	Burk-Herrick et al
c.1250A>G	p.N417S	Conflicting interpretations	Burk-Herrick et al, Fleming et al
c.1258G>T	p.D420Y	Conflicting interpretations	Burk-Herrick et al
c.1581G>C	p.K527N	Conflicting interpretations	Burk-Herrick et al, Fleming et al
c.2060A>C	p.Q687P	Conflicting interpretations	Burk-Herrick et al
c.2222C>T	p.S741F	Conflicting interpretations	Burk-Herrick et al
c.2473G>T	p.D825Y	Conflicting interpretations	Burk-Herrick et al, Fleming et al
c.2726A>T	p.N909I	Conflicting interpretations	Burk-Herrick et al
c.2935C>T	p.R979C	Conflicting interpretations	Burk-Herrick et al, Fleming et al
c.3179A>C	p.E1060A	Conflicting interpretations	Burk-Herrick et al, Fleming et al
c.3407C>G	p.P1136R	Conflicting interpretations	Burk-Herrick et al, Fleming et al
c.3410T>C	p.M1137T	Conflicting interpretations	Burk-Herrick et al
c.823G>A	p.G275S	Benign	Lou et al.
c.827C>G	p.T276R	Benign	Burk-Herrick et al, Fleming et al
c.839C>G	p.A280G	Benign	Burk-Herrick et al
c.946A>G	p.S316G	Benign	Burk-Herrick et al
c.1067A>G	p.Q356R	Benign	Burk-Herrick et al, Fleming et al
c.1383T>A	p.F461L	Benign	Burk-Herrick et al
c.1648A>C	p.N550H	Benign	Burk-Herrick et al, Fleming et al
c.1703C>T	p.P568L	Benign	Burk-Herrick et al
c.1789G>A	p.E597K	Benign	Burk-Herrick et al
c.1834A>G	p.R612G	Benign	Burk-Herrick et al
c.1924G>C	p.D642H	Benign	Fleming et al
c.2083G>T	p.D695Y	Benign	Burk-Herrick et al
c.2180C>T	p.P727L	Benign	Burk-Herrick et al, Huttley et al
c.2315T>C	p.V772A	Benign	Burk-Herrick et al, Fleming et al
c.2351C>T	p.S784L	Benign	Burk-Herrick et al
c.2428A>T	p.N810Y	Benign	Burk-Herrick et al
c.2477C>A	p.T826K	Benign	Burk-Herrick et al
c.2521C>T	p.R841W	Benign	Burk-Herrick et al
c.2566T>C	p.Y856H	Benign	Burk-Herrick et al
c.2584A>G	p.K862E	Benign	Burk-Herrick et al
c.2596C>T	p.R866C	Benign	Fleming et al
c.2612C>T	p.P871L	Benign	Fleming et al
c.2773A>C	p.I925L	Benign	Burk-Herrick et al, Fleming et al
c.3024G>A	p.M1008I	Benign	Lou et al.
c.3082C>T	p.R1028C	Benign	Fleming et al
c.3302G>A	p.S1101N	Benign	Fleming et al
c.3327A>C	p.K1109N	Benign	Lou et al.
c.3640G>A	p.E1214K	Benign	Burk-Herrick et al, Fleming et al
c.3657G>C	p.E1219D	Benign	Burk-Herrick et al, Fleming et al
c.4039A>G	p.R1347G	Benign	Fleming et al
c.4308T>C	p.S1436S	Benign	Burk-Herrick et al, Fleming et al
c.4837A>G	p.S1613G	Benign	Burk-Herrick et al
c.1137T>G	p.I379M	Benign/Likely benign	Burk-Herrick et al, Fleming et al
c.1427A>G	p.H476R	Benign/Likely benign	Burk-Herrick et al, Fleming et al
c.851A>G	p.Q284R	Uncertain significance​	Burk-Herrick et al
c.900A>C	p.E300D	Uncertain significance​	Burk-Herrick et al
c.943A>G	p.R315G	Uncertain significance​	Fleming et al
c.993G>C	p.R331S	Uncertain significance​	Burk-Herrick et al
c.4376A>G	p.K355R	Uncertain significance​	Burk-Herrick et al
c.1121C>T	p.T374I	Uncertain significance​	Fleming et al
c.1374C>A	p.D411E	Uncertain significance​	Burk-Herrick et al, Fleming et al
c.1231G>A	p.D411N	Uncertain significance​	Lou et al, Huttley et al
c.1333G>C	p.E445Q	Uncertain significance​	Burk-Herrick et al
c.1367T>C	p.I456T	Uncertain significance​	Burk-Herrick et al
c.1384G>A	p.G462R	Uncertain significance​	Lou et al.
c.1396C>G	p.R466G	Uncertain significance​	Burk-Herrick et al
c.1477A>C	p.I493L	Uncertain significance​	Burk-Herrick et al
c.1510C>T	p.R504C	Uncertain significance​	Lou et al.
c.1520G>T	p.R507I	Uncertain significance​	Burk-Herrick et al
c.1541C>G	p.P514R	Uncertain significance​	Burk-Herrick et al, Fleming et al
c.1564G>A	p.D522N	Uncertain significance​	Burk-Herrick et al
c.1745C>T	p.T582M	Uncertain significance	Burk-Herrick et al, Fleming et al
c.1967A>G	p.N609S	Uncertain significance​	Lou et al.
c.1870G>A	p.E624K	Uncertain significance​	Lou et al.
c.1884T>G	p.S628R	Uncertain significance​	Burk-Herrick et al, Fleming et al
c.1895G>A	p.S632N	Uncertain significance​	Burk-Herrick et al, Fleming et al
c.1934C>A	p.S645Y	Uncertain significance​	Burk-Herrick et al, Fleming et al
c.2222C>G	p.S741C	Uncertain significance​	Burk-Herrick et al
c.2294A>G	p.E765G	Uncertain significance​	Burk-Herrick et al
c.2362G>A	p.V788I	Uncertain significance​	Burk-Herrick et al
c.2387C>T	p.T796I	Uncertain significance​	Burk-Herrick et al
c.2397T>A	p.N799K	Uncertain significance​	Burk-Herrick et al, Fleming et al
c.2419G>T	p.A807S	Uncertain significance​	Burk-Herrick et al, Fleming et al
c.2675T>C	p.L892S	not provided	Burk-Herrick et al
c.2774T>C	p.I925T	Uncertain significance​	Fleming et al
c.2818G>T	p.D940Y	Uncertain significance​	Burk-Herrick et al, Fleming et al
c.3046A>G	p.N1016D	Uncertain significance​	Burk-Herrick et al
c.3080G>A	p.S1027N	Uncertain significance​	Burk-Herrick et al
c.3152C>T	p.T1051I	Uncertain significance​	Lou et al, Huttley et al
c.3220A>G	p.R1074G	Uncertain significance​	Burk-Herrick et al
c.3227G>C	p.R1076T	Uncertain significance​	Burk-Herrick et al
c.3263T>A	p.V1088D	Uncertain significance​	Burk-Herrick et al
c.3308G>T	p.C1103F	Uncertain significance​	Burk-Herrick et al
c.3313C>A	p.H1105N	Uncertain significance​	Lou et al.
c.3432G>T	p.Q1144H	Uncertain significance​	Huttley et al
c.3515A>G	p.E1172G	Uncertain significance​	Lou et al.
c.3527T>A	p.V1176D	Uncertain significance​	Lou et al, Huttley et al
c.3548_3549delinsGG	p.K1183R	Uncertain significance​	Burk-Herrick et al
c.3587C>A	p.T1196K	Uncertain significance​	Lou et al.
c.3652A>T	p.S1218C	Uncertain significance​	Lou et al.
BRCA2
c.5946del	p.S1982fs	Pathogenic	Lou et al.
c.3814A>G	p.M1272V	Conflicting interpretations	Lou et al.
c.8567A>C	p.E2856A	Conflicting interpretations	Lou et al.
c.125A>G	p.Y42C	Benign	Lou et al.
c.1151C>T	p.S384F	Benign	Lou et al.
c.1514T>C	p.I505T	Benign	Lou et al.
c.1964C>G	p.P655R	Benign	Lou et al.
c.4258G>T	p.D1420Y	Benign	Lou et al.
c.7469T>C	p.I2490T	Benign	Lou et al.
c.9976A>T	p.K3326X	Benign	Lou et al.
c.3022A>G	p.S1008G	Likely benign	Lou et al.
c.1796=	p.F599S	Uncertain significance​	Lou et al.
c.4277C>A	p.T1426K	Uncertain significance​	Lou et al.
c.1114=	p.H372N	not provided​	Lou et al.
