# Supplementary material for: Human BRCA pathogenic variants were originated during recent human history
Source: Life Sci Alliance. 2022 Feb 14;5(5):e202101263. doi: 10.26508/lsa.202101263 (PMC8860097; doi:10.26508/lsa.202101263)
Supplement: Supplementary file 2 [file LSA-2021-01263_TableS2.xlsx]

## Sheet: BRCA1
Supplementary Table 2A. Human BRCA1 pathogenic variants (ClinVar)
Genome position	HGVS		Mutation Type	Variant impact
(hg38) NC_000017.11	cDNA (NM_007294)	Protein
g.43044295_43045802del	c.5469_6975del	p.A1823fs	stoploss	Pathogenic
g.43045573_43045576del	c.106_103delTGTC		UTR3 variant	Pathogenic
g.43045704del	c.5569delC	p.Q1857Rfs	frameshift deletion	Likely_pathogenic
g.43045703_43045715del	c.5557_5569del	p.Y1853Rfs	frameshift deletion	Likely_pathogenic
g.43045706_43045767del	c.5503_5564del	p.R1835Tfs	frameshift deletion	Pathogenic
g.43045709AGGT	c.5561_5562insACCT	p.I1855Pfs	frameshift insertion	Likely_pathogenic
g.43045711del	c.5560delC	p.L1854fs	stopgain	Pathogenic
g.43045711_43045715del	c.5556_5560del	p.Y1853Dfs	frameshift deletion	Pathogenic
g.43045711G>C	c.C5559G	p.Y1853X	stopgain	Pathogenic
g.43045712dup	c.5558dupA	p.Y1853fs	stopgain	Pathogenic
g.43045711G>T	c.C5559A	p.Y1853X	stopgain	Pathogenic
g.43045712_43045716del	c.5554_5558del	p.T1852Pfs	frameshift deletion	Pathogenic
g.43045712T>C	c.A5558G	p.Y1853C	nonsynonymous SNV	Pathogenic/Likely_pathogenic
g.43045717_43045736del	c.5537_5556del	p.Q1846Lfs	frameshift deletion	Pathogenic
g.43045715_43045716GT	c.5554_5555del	p.T1852Lfs	frameshift deletion	Pathogenic
g.43045717dup	c.5553dupC	p.T1852Hfs	frameshift insertion	Pathogenic
g.43045720del	c.5551delG	p.D1851Tfs	frameshift deletion	Pathogenic
g.43045722del	c.5548delC	p.L1850Wfs	frameshift deletion	Pathogenic
g.43045728G>A	c.C5542T	p.Q1848X	stopgain	Pathogenic
g.43045729G>T	c.C5541A	p.C1847X	stopgain	Pathogenic
g.43045731_43045736delinsCCTGCTGTCCTGGCACTGG	c.5534_5539CCAGTGCCAGGACAGCAGG	p.Y1845Sfs	frameshift substitution	Likely_pathogenic
g.43045735del	c.5536delC	p.Q1846Sfs	frameshift deletion	Pathogenic
g.43045734G>A	c.C5536T	p.Q1846X	stopgain	Pathogenic
g.43045735G>C	c.C5535G	p.Y1845X	stopgain	Pathogenic
g.43045735G>T	c.C5535A	p.Y1845X	stopgain	Pathogenic
g.43045736del	c.5534delA	p.Y1845Sfs	frameshift deletion	Pathogenic
g.43045737dup	c.5533dupT	p.Y1845Lfs	frameshift insertion	Pathogenic
g.43045736_43045737insC	c.5533_5534insG	p.Y1845fs	stopgain	Pathogenic
g.43045737_43045738AG	c.5532_5533del	p.Y1845Pfs	frameshift deletion	Pathogenic
g.43045740_43045747del	c.5524_5531del	p.V1842Lfs	frameshift deletion	Pathogenic
g.43045743C>G	c.G5527C	p.A1843P	nonsynonymous SNV	Likely_pathogenic
g.43045745del	c.5525delT	p.V1842Efs	frameshift deletion	Pathogenic
g.43045749del	c.5521delA	p.S1841Vfs	frameshift deletion	Pathogenic
g.43045749T>G	c.A5521C	p.S1841R	nonsynonymous SNV	Likely_pathogenic
g.43045751_43045814dup	c.5520_5521insTCTGTCTCCAGCAATTGGGCAGATGTGTGAGGCACCTGTGGTGACCCGAGAGTGGGTGTTGGAC	p.A1843Sfs	stopgain	Pathogenic
g.43045753del	c.5518delG	p.D1840Tfs	frameshift deletion	Pathogenic
g.43045752_43045753insG	c.5517_5518insC	p.D1840Rfs	frameshift insertion	Likely_pathogenic
g.43045754A>G	c.T5516C	p.L1839S	nonsynonymous SNV	Pathogenic
g.43045757A>C	c.T5513G	p.V1838G	nonsynonymous SNV	Likely_pathogenic
g.43045757A>T	c.T5513A	p.V1838E	nonsynonymous SNV	Pathogenic
g.43045760del	c.5512delG	p.V1838Cfs	frameshift deletion	Pathogenic
g.43045763_43045776del	c.5498_5511del	p.V1833Gfs	frameshift deletion	Pathogenic
g.43045759C>A	c.G5511T	p.W1837C	nonsynonymous SNV	Pathogenic/Likely_pathogenic
g.43045759C>T	c.G5511A	p.W1837X	stopgain	Pathogenic
g.43045761_43045762del	c.5509_5510del	p.W1837Gfs	frameshift deletion	Pathogenic
g.43045763_43045787del	c.2100_2124del	p.E1829fs	stoploss	Pathogenic
g.43045760C>T	c.G5510A	p.W1837X	stopgain	Pathogenic
g.43045761A>C	c.T5509G	p.W1837G	nonsynonymous SNV	Likely_pathogenic
g.43045761A>G	c.T5509C	p.W1837R	nonsynonymous SNV	Pathogenic
g.43045761A>T	c.T5509A	p.W1837R	nonsynonymous SNV	Pathogenic
g.43045764_43045767del	c.5503_5506del	p.R1835Sfs	frameshift deletion	Pathogenic
g.43045765_43045774del	c.5497_5506del	p.V1833Sfs	frameshift deletion	Pathogenic
g.43045764C>A	c.G5506T	p.E1836X	stopgain	Pathogenic
g.43045764_43045774delinsT	c.5496_5506A	p.V1833Sfs	frameshift substitution	Pathogenic
g.43045769dup	c.5503dupC	p.R1835Pfs	frameshift insertion	Pathogenic
g.43045768_43045769dup	c.5503_5504insCC	p.R1835Pfs	frameshift insertion	Pathogenic
g.43045769del	c.5503delC	p.R1835Efs	frameshift deletion	Pathogenic
g.43045767G>A	c.C5503T	p.R1835X	stopgain	Pathogenic
g.43045771_43045774del	c.5496_5499del	p.V1833Pfs	frameshift deletion	Pathogenic
g.43045773C>T	c.G5497A	p.V1833M	nonsynonymous SNV	Pathogenic/Likely_pathogenic
g.43045775_43045776insAA	c.5495_5496insTT	p.V1833Wfs	frameshift insertion	Pathogenic
g.43045777_43045778insAA	c.5493_5494insTT	p.V1832Lfs	frameshift insertion	Pathogenic
g.43045779del	c.5492delC	p.P1831Lfs	frameshift deletion	Pathogenic
g.43045780del	c.5490delA	p.P1831Lfs	frameshift deletion	Pathogenic
g.43045785dup	c.5485dupG	p.E1829Gfs	frameshift insertion	reviewed_by_expert_panel
g.43045785_43045786CA	c.2098_2099del	p.C1828_E1829delinsX	stopgain	Pathogenic
g.43045787del	c.2097delG	p.C1828fs	stoploss	Pathogenic
g.43045791_43045798del	c.2088_2095del	p.W696Cfs	frameshift deletion	Pathogenic
g.43045792_43045793dup	c.2093_2094insGA	p.D698Efs	frameshift insertion	Pathogenic
g.43045796_43045803del	c.2084_2091del	p.N695Rfs	frameshift deletion	Pathogenic
g.43045794G>A	c.C5476T	p.Q1826X	stopgain	Pathogenic
g.43045802_43045803delinsAA	c.C5468T	p.A1823V	nonsynonymous SNV	Likely_pathogenic
g.43045803C>T	c.5468-1G>A		splice site	Pathogenic
g.43045804T>A	c.5468-2A>T		splice site	Pathogenic/Likely_pathogenic
g.43045804T>C	c.5468-2A>G		splice site	Pathogenic/Likely_pathogenic
g.43045842A>T	c.5468-40		intron variant	Pathogenic
g.43047641A>C	c.5467+2T>G		splice site	Likely_pathogenic
g.43047641A>G	c.5467+2T>C		splice site	Pathogenic/Likely_pathogenic
g.43047643del	c.5467+1G>-		splice site	Pathogenic
g.43047642C>T	c.5467+1G>A		splice site	Pathogenic/Likely_pathogenic
g.43047644dup	c.5466dupT	p.A1823Cfs	frameshift insertion	Pathogenic
g.43047643C>T	c.G5467A	p.A1823T	nonsynonymous SNV	Pathogenic
g.43047645_43047646insA	c.5464_5465insT	p.H1822Lfs	frameshift insertion	Pathogenic
g.43047646_43047647insA	c.5463_5464insT	p.H1822Sfs	frameshift insertion	Pathogenic
g.43047657T>C	c.A5453G	p.D1818G	nonsynonymous SNV	Pathogenic/Likely_pathogenic
g.43047659_43047660CT	c.5450_5451del	p.E1817Gfs	frameshift deletion	Pathogenic
g.43047661C>A	c.G5449T	p.E1817X	stopgain	Pathogenic
g.43047665C>T	c.G5445A	p.W1815X	stopgain	Pathogenic
g.43047666C>T	c.G5444A	p.W1815X	stopgain	Pathogenic
g.43047670dup	c.5440dupG	p.A1814Gfs	frameshift insertion	Likely_pathogenic
g.43047670del	c.5440delG	p.A1814Pfs	frameshift deletion	Pathogenic
g.43047676G>C	c.C5434G	p.P1812A	nonsynonymous SNV	Pathogenic/Likely_pathogenic
g.43047679G>A	c.C5431T	p.Q1811X	stopgain	Pathogenic
g.43047680_43047681insTC	c.5430_5431insAG	p.Q1811Sfs	frameshift insertion	Pathogenic
g.43047679_43047680insTC	c.5430_5431insGA	p.Q1811Dfs	frameshift insertion	Pathogenic
g.43047684dup	c.5427dupT	p.V1810Cfs	frameshift insertion	Pathogenic
g.43047684A>T	c.T5426A	p.V1809D	nonsynonymous SNV	Likely_pathogenic
g.43047685C>A	c.G5425T	p.V1809F	nonsynonymous SNV	Likely_pathogenic
g.43047692dup	c.5419dupA	p.I1807Nfs	frameshift insertion	Pathogenic
g.43047692del	c.5419delA	p.I1807Lfs	frameshift deletion	Pathogenic
g.43047695del	c.5417delC	p.P1806Qfs	frameshift deletion	Pathogenic
g.43047696_43047703del	c.5407_5414del	p.G1803Pfs	frameshift deletion	Pathogenic
g.43047702C>G	c.G5408C	p.G1803A	nonsynonymous SNV	Pathogenic/Likely_pathogenic
g.43047704C>G	c.5407-1G>C		splice site	Pathogenic/Likely_pathogenic
g.43047704C>T	c.5407-1G>A		splice site	Pathogenic/Likely_pathogenic
g.43047705T>A	c.5407-2A>T		splice site	Pathogenic
g.43047705T>C	c.5407-2A>G		splice site	Pathogenic
g.43048723_43049232del	c.5333_5406del	p.D1778Gfs	frameshift deletion	Pathogenic
g.43049109_43049127del	c.5402_5406del	p.T1802Cfs	frameshift deletion	Likely_pathogenic
g.43049114_43049117TACT	c.5406+4_5406+7del		intron variant	Pathogenic/Likely_pathogenic
g.43049116C>G	c.5406+5G>T		intron variant	Pathogenic/Likely_pathogenic
g.43049116C>T	c.5406+5G>A		intron variant	Pathogenic
g.43049117T>C	c.5406+4A>G		intron variant	Pathogenic/Likely_pathogenic
g.43049119_43049121del	c.5406+1_5406+3del		splice site	Pathogenic/Likely_pathogenic
g.43049118T>A	c.5406+3A>T		intron variant	Pathogenic
g.43049119del	c.5406+2T>-		splice site	Pathogenic
g.43049120C>T	c.5406+1G>A		splice site	Pathogenic
g.43049131del	c.5398delC	p.G1801Afs	frameshift deletion	Pathogenic
g.43049131_43049158del	c.5370_5397del	p.V1791Lfs	frameshift deletion	Pathogenic
g.43049136del	c.5391delA	p.F1798Sfs	frameshift deletion	Pathogenic
g.43049137G>C	c.C5390G	p.S1797X	stopgain	Pathogenic
g.43049138dup	c.5389dupT	p.S1797Ffs	frameshift insertion	Pathogenic
g.43049137G>T	c.C5390A	p.S1797X	stopgain	Pathogenic
g.43049140_43049392del	c.5333_5387del	p.Q1779Hfs	frameshift deletion	Pathogenic
g.43049140G>C	c.C5387G	p.S1796X	stopgain	Pathogenic
g.43049143dup	c.5386dupT	p.S1796Ffs	frameshift insertion	Pathogenic
g.43049140G>T	c.C5387A	p.S1796X	stopgain	Pathogenic
g.43049143del	c.5386delT	p.S1796Hfs	frameshift deletion	Pathogenic
g.43049146_43049162del	c.5369_5385del	p.S1790Ffs	frameshift deletion	Pathogenic
g.43049147C>A	c.G5380T	p.E1794X	stopgain	Pathogenic
g.43049150T>A	c.A5377T	p.K1793X	stopgain	Pathogenic
g.43049160del	c.5368delT	p.S1790Lfs	frameshift deletion	Pathogenic
g.43049161del	c.5366delC	p.A1789Vfs	frameshift deletion	Pathogenic
g.43049161_43049162delinsT	c.5365_5366A	p.A1789Ifs	frameshift substitution	Pathogenic
g.43049164C>A	c.G5363T	p.G1788V	nonsynonymous SNV	Pathogenic
g.43049164C>G	c.G5363C	p.G1788A	nonsynonymous SNV	Likely_pathogenic
g.43049165_43049166CA	c.5361_5362del	p.C1787Wfs	frameshift deletion	Pathogenic
g.43049164_43049168delinsTCACT	c.5359_5363AGTGA	p.C1787_G1788delinsSD	nonframeshift substitution	Pathogenic
g.43049165C>A	c.G5362T	p.G1788C	nonsynonymous SNV	Likely_pathogenic
g.43049166_43049167delinsCT	c.5360_5361AG	p.C1787_Y1863del	stopgain	Pathogenic
g.43049174_43049175dup	c.5354_5355insCA	p.Q1785Hfs	frameshift insertion	Pathogenic
g.43049174G>A	c.C5353T	p.Q1785X	stopgain	Pathogenic
g.43049175dup	c.5352dupA	p.Q1785Tfs	frameshift insertion	Pathogenic
g.43049178del	c.5350delG	p.V1784Yfs	frameshift deletion	Pathogenic
g.43049179del	c.5348delT	p.M1783Rfs	frameshift deletion	Pathogenic
g.43049181C>T	c.G5346A	p.W1782X	stopgain	Pathogenic
g.43049182C>T	c.G5345A	p.W1782X	stopgain	Pathogenic
g.43049184_43049186delinsCA	c.5341_5343TG	p.E1781Cfs	frameshift substitution	Pathogenic
g.43049187del	c.5341delG	p.E1781Nfs	frameshift deletion	Pathogenic
g.43049186C>A	c.G5341T	p.E1781X	stopgain	Pathogenic
g.43049188A>G	c.T5339C	p.L1780P	nonsynonymous SNV	Pathogenic/Likely_pathogenic
g.43049189del	c.5338delC	p.L1780Wfs	frameshift deletion	Pathogenic
g.43049192del	c.5335delC	p.Q1779Nfs	frameshift deletion	Pathogenic
g.43049192G>A	c.C5335T	p.Q1779X	stopgain	Pathogenic
g.43049195C>A	c.5333-1G>T		splice site	Pathogenic
g.43049195C>G	c.5333-1G>C		splice site	Pathogenic/Likely_pathogenic
g.43049195C>T	c.5333-1G>A		splice site	Pathogenic/Likely_pathogenic
g.43049196T>A	c.5333-2A>T		splice site	Likely_pathogenic
g.43049196T>C	c.5333-2A>G		splice site	Likely_pathogenic
g.43049196T>G	c.5333-2A>C		splice site	Pathogenic
g.43049197A>C	c.5333-3T>G		intron variant	Pathogenic
g.43049217_43049231del	c.5333-36_5333-22del		intron variant	Pathogenic
g.43051057_43051064delinsATGTTG	c.5331_5332CA	p.D1778N	nonframeshift substitution	Pathogenic
g.43051061A>C	c.5332+2T>G		splice site	Pathogenic
g.43051061A>G	c.5332+2T>C		splice site	Pathogenic
g.43051061A>T	c.5332+2T>A		splice site	Pathogenic/Likely_pathogenic
g.43051064_43051086del	c.5311_5332del	p.P1771Ifs	frameshift deletion	Pathogenic
g.43051062C>A	c.5332+1G>T		splice site	Pathogenic/Likely_pathogenic
g.43051062C>G	c.5332+1G>C		splice site	Pathogenic/Likely_pathogenic
g.43051062C>T	c.5332+1G>A		splice site	Pathogenic
g.43051062_43051064delinsATGTTG	c.5331_5332CA	p.D1778N	nonframeshift substitution	Pathogenic
g.43051063_43051116del	c.5279_5332del	p.I1760_D1778delinsN	nonframeshift deletion	Pathogenic
g.43051069dup	c.5328dupC	p.T1777Hfs	frameshift insertion	Pathogenic
g.43051069del	c.5328delC	p.T1777Qfs	frameshift deletion	Pathogenic
g.43051071_43051072del	c.5323_5324del	p.M1775Afs	frameshift deletion	Pathogenic
g.43051071A>C	c.T5324G	p.M1775R	nonsynonymous SNV	Pathogenic
g.43051071A>T	c.T5324A	p.M1775K	nonsynonymous SNV	Pathogenic
g.43051074_43051075del	c.5320_5321del	p.N1774Hfs	frameshift deletion	Pathogenic
g.43051077dup	c.5319dupC	p.N1774Qfs	frameshift insertion	Pathogenic
g.43051081del	c.5315delT	p.F1772Sfs	frameshift deletion	Pathogenic
g.43051084_43051085del	c.5310_5311del	p.P1771Lfs	frameshift deletion	Pathogenic
g.43051087dup	c.5310dupG	p.P1771Afs	frameshift insertion	Pathogenic
g.43051087del	c.5310delG	p.F1772Sfs	frameshift deletion	Pathogenic
g.43051086C>A	c.G5309T	p.G1770V	nonsynonymous SNV	Pathogenic
g.43051088A>C	c.T5307G	p.Y1769X	stopgain	Likely_pathogenic
g.43051088A>T	c.T5307A	p.Y1769X	stopgain	Pathogenic
g.43051091del	c.5304delC	p.Y1769Mfs	frameshift deletion	Pathogenic
g.43051094del	c.5302delT	p.C1768Afs	frameshift deletion	Pathogenic
g.43051095_43051096del	c.5300_5301del	p.C1767Lfs	frameshift deletion	Pathogenic
g.43051094A>T	c.T5301A	p.C1767X	stopgain	Pathogenic
g.43051096del	c.5299delT	p.C1767Vfs	frameshift deletion	Pathogenic
g.43051101dup	c.5296dupA	p.I1766Nfs	frameshift insertion	Pathogenic
g.43051098A>C	c.T5297G	p.I1766S	nonsynonymous SNV	Pathogenic
g.43051098A>T	c.T5297A	p.I1766N	nonsynonymous SNV	Pathogenic
g.43051102C>A	c.G5293T	p.E1765X	stopgain	Pathogenic
g.43051104A>G	c.T5291C	p.L1764P	nonsynonymous SNV	Pathogenic
g.43051105del	c.5290delC	p.L1764fs	stopgain	Pathogenic
g.43051110dup	c.5289dupG	p.L1764Afs	frameshift insertion	Pathogenic
g.43051110del	c.5289delG	p.L1764fs	frameshift deletion	Pathogenic
g.43051111del	c.5284delA	p.R1762Gfs	frameshift deletion	Pathogenic
g.43051114del	c.5282delT	p.F1761Sfs	frameshift deletion	Pathogenic
g.43051118C>A	c.5278-1G>T		splice site	Pathogenic
g.43051118C>G	c.5278-1G>C		splice site	Pathogenic
g.43051118C>T	c.5278-1G>A		splice site	Pathogenic
g.43051119del	c.5278-2A>-		splice site	Pathogenic
g.43051119T>A	c.5278-2A>T		splice site	Likely_pathogenic
g.43051119T>C	c.5278-2A>G		splice site	Pathogenic/Likely_pathogenic
g.43051119T>G	c.5278-2A>C		splice site	Likely_pathogenic
g.43053874_43057073del	c.5256_5277del	p.R1753Sfs	frameshift deletion	Pathogenic
g.43057050_43057055del	c.5277+1_5277+6del		splice site	Pathogenic
g.43057052del	c.5277+1G>-		splice site	Pathogenic/Likely_pathogenic
g.43057051C>A	c.5277+1G>T		splice site	Pathogenic
g.43057051C>T	c.5277+1G>A		splice site	Pathogenic
g.43057052_43057058del	c.5271_5277del	p.D1757Efs	frameshift deletion	Pathogenic
g.43057052C>A	c.G5277T	p.K1759N	nonsynonymous SNV	Likely_pathogenic
g.43057055del	c.5276delA	p.K1759Rfs	frameshift deletion	Pathogenic
g.43057053_43057059del	c.5270_5276del	p.D1757Gfs	frameshift deletion	Pathogenic
g.43057056_43057062del	c.5268_5274del	p.D1757Rfs	frameshift deletion	Pathogenic
g.43057059_43057063del	c.5269_5273del	p.D1757Kfs	frameshift deletion	Pathogenic
g.43057059_43057060insG	c.5269_5270insC	p.D1757Afs	frameshift insertion	Pathogenic
g.43057060_43057061insG	c.5268_5269insC	p.D1757Rfs	frameshift insertion	Pathogenic
g.43057061_43057062insG	c.5267_5268insC	p.Q1756Hfs	frameshift insertion	Pathogenic
g.43057065dup	c.5266dupC	p.Q1756Pfs	frameshift insertion	Pathogenic
g.43057063G>A	c.C5266T	p.Q1756X	stopgain	Pathogenic
g.43057069C>A	c.G5260T	p.E1754X	stopgain	Pathogenic
g.43057070del	c.5259delA	p.E1754Nfs	frameshift deletion	Pathogenic
g.43057073dup	c.5257dupA	p.R1753Kfs	frameshift insertion	Pathogenic
g.43057075C>G	c.G5254C	p.A1752P	nonsynonymous SNV	Likely_pathogenic
g.43057077C>G	c.G5252C	p.R1751P	nonsynonymous SNV	Likely_pathogenic
g.43057079_43057094del	c.5236_5251del	p.H1746Efs	frameshift deletion	Pathogenic
g.43057078G>A	c.C5251T	p.R1751X	stopgain	Pathogenic
g.43057079del	c.5250delG	p.K1750Nfs	frameshift deletion	Pathogenic
g.43057082dup	c.5249dupA	p.R1751Afs	frameshift insertion	Pathogenic
g.43057082del	c.5249delA	p.K1750Sfs	frameshift deletion	Pathogenic
g.43057080_43057081insGA	c.5248_5249insTC	p.K1750Ifs	frameshift insertion	Pathogenic
g.43057081T>A	c.A5248T	p.K1750X	stopgain	Pathogenic
g.43057081_43057082insGA	c.5247_5248insTC	p.K1750Sfs	frameshift insertion	Pathogenic
g.43057081_43057120delinsGA	c.5209_5248TC	p.R1737Sfs	frameshift substitution	Pathogenic
g.43057082_43057121delinsGA	c.5208_5247TC	p.R1737Qfs	frameshift substitution	Pathogenic
g.43057083G>C	c.C5246G	p.P1749R	nonsynonymous SNV	Pathogenic
g.43057087del	c.5243delG	p.G1748Vfs	frameshift deletion	Pathogenic
g.43057086C>T	c.G5243A	p.G1748D	nonsynonymous SNV	Likely_pathogenic
g.43057089del	c.5241delA	p.G1748Vfs	frameshift deletion	Pathogenic
g.43057091dup	c.5239dupC	p.Q1747Pfs	frameshift insertion	Pathogenic
g.43057091del	c.5239delC	p.Q1747Kfs	frameshift deletion	Pathogenic
g.43057090G>A	c.C5239T	p.Q1747X	stopgain	Pathogenic
g.43057092del	c.5237delA	p.H1746Pfs	frameshift deletion	Pathogenic
g.43057091_43057097delinsCTCGCTTTGGAC	c.5232_5238GTCCAAAGCGAG	p.N1745Sfs	frameshift substitution	Pathogenic/Likely_pathogenic
g.43057093_43057100del	c.5230_5237del	p.R1744Pfs	frameshift deletion	Pathogenic
g.43057093_43057145dup	c.5236_5237insTTTCTTTCAGCATGATTTTGAAGTCAGAGGAGATGTGGTCAATGGAAGAAACC	p.H1746Lfs	frameshift insertion	Pathogenic
g.43057094del	c.5236delC	p.H1746Tfs	frameshift deletion	Pathogenic
g.43057097dup	c.5234dupA	p.N1745Kfs	frameshift insertion	Pathogenic
g.43057098del	c.5231delG	p.R1744Kfs	frameshift deletion	Pathogenic
g.43057100del	c.5230delA	p.R1744Efs	frameshift deletion	Pathogenic
g.43057099_43057100del	c.5229_5230del	p.R1744Kfs	frameshift deletion	Pathogenic
g.43057102C>A	c.G5227T	p.G1743X	stopgain	Pathogenic
g.43057105_43057108del	c.5221_5224del	p.V1741Mfs	frameshift deletion	Pathogenic
g.43057106del	c.5223delC	p.N1742Mfs	frameshift deletion	Pathogenic
g.43057113del	c.5216delA	p.D1739Vfs	frameshift deletion	Pathogenic
g.43057113_43057114TC	c.5215_5216del	p.D1739Cfs	frameshift deletion	Pathogenic
g.43057117del	c.5213delG	p.G1738Efs	frameshift deletion	Pathogenic
g.43057116C>A	c.G5213T	p.G1738V	nonsynonymous SNV	Pathogenic
g.43057116C>T	c.G5213A	p.G1738E	nonsynonymous SNV	Pathogenic/Likely_pathogenic
g.43057117_43057118CT	c.5211_5212del	p.G1738Rfs	frameshift deletion	Pathogenic
g.43057117C>A	c.G5212T	p.G1738X	stopgain	Pathogenic
g.43057117C>G	c.G5212C	p.G1738R	nonsynonymous SNV	Pathogenic
g.43057117C>T	c.G5212A	p.G1738R	nonsynonymous SNV	Pathogenic
g.43057118_43057119insG	c.5210_5211insC	p.R1737Sfs	frameshift insertion	Pathogenic
g.43057119_43057120insG	c.5209_5210insC	p.R1737Tfs	frameshift insertion	Pathogenic
g.43057120dup	c.5209dupA	p.R1737Kfs	frameshift insertion	Pathogenic
g.43057120T>A	c.A5209T	p.R1737X	stopgain	Pathogenic
g.43057122del	c.5207delT	p.V1736Afs	frameshift deletion	Pathogenic
g.43057122A>C	c.T5207G	p.V1736G	nonsynonymous SNV	Pathogenic/Likely_pathogenic
g.43057122A>G	c.T5207C	p.V1736A	nonsynonymous SNV	Pathogenic
g.43057125del	c.5205delA	p.V1736Sfs	frameshift deletion	Pathogenic
g.43057130del	c.5202delT	p.F1734Lfs	frameshift deletion	Pathogenic
g.43057127_43057128insG	c.5201_5202insC	p.E1735fs	frameshift insertion	Pathogenic
g.43057128_43057129insG	c.5200_5201insC	p.F1734Sfs	frameshift insertion	Pathogenic
g.43057132_43057136delinsAATA	c.5194_5197TATT	p.H1732_D1733delinsYY	nonframeshift substitution	Pathogenic
g.43057136C>A	c.5194-1G>T		splice site	Pathogenic
g.43057136C>G	c.5194-1G>C		splice site	Pathogenic
g.43057136C>T	c.5194-1G>A		splice site	Pathogenic
g.43057137T>C	c.5194-2A>G		splice site	Pathogenic/Likely_pathogenic
g.43057137T>G	c.5194-2A>C		splice site	Likely_pathogenic
g.43057147C>T	c.5194-12G>A		intron variant	Pathogenic
g.43061133_43063725delinsAAAAAAAAAAAA	c.5153_5193TTTTTTTTTTTT	p.W1718Ffs	frameshift substitution	Pathogenic
g.43063331del	c.5193+2T>-		splice site	Pathogenic
g.43063331A>C	c.5193+2T>G		splice site	Pathogenic
g.43063333del	c.5193+1G>-		splice site	Pathogenic
g.43063332C>A	c.5193+1G>T		splice site	Pathogenic
g.43063332C>G	c.5193+1G>C		splice site	Pathogenic
g.43063332C>T	c.5193+1G>A		splice site	Pathogenic
g.43063336_43063349del	c.5179_5192del	p.K1727Afs	frameshift deletion	Pathogenic
g.43063335C>A	c.G5191T	p.E1731X	stopgain	Pathogenic
g.43063340del	c.5186delT	p.L1729Rfs	frameshift deletion	Pathogenic
g.43063348dup	c.5182dupA	p.M1728Nfs	frameshift insertion	Pathogenic
g.43063348del	c.5182delA	p.M1728Cfs	frameshift deletion	Pathogenic
g.43063347_43063348del	c.5181_5182del	p.K1727Nfs	frameshift deletion	Pathogenic
g.43063349_43063352CTTT	c.5177_5180del	p.R1726Kfs	frameshift deletion	Pathogenic
g.43063347T>A	c.A5179T	p.K1727X	stopgain	Pathogenic
g.43063349_43063350del	c.5177_5178del	p.R1726Kfs	frameshift deletion	Pathogenic
g.43063352del	c.5176delA	p.R1726Efs	frameshift deletion	Pathogenic
g.43063350T>A	c.A5176T	p.R1726X	stopgain	Pathogenic
g.43063353C>A	c.G5173T	p.E1725X	stopgain	Pathogenic
g.43063356dup	c.5172dupA	p.E1725Rfs	frameshift insertion	Pathogenic
g.43063359delinsAAA	c.5167delinsTTT	p.I1723Ffs	frameshift substitution	Pathogenic
g.43063361dup	c.5165dupC	p.I1723fs	frameshift insertion	Pathogenic
g.43063362_43063366del	c.5161_5165del	p.Q1721fs	frameshift deletion	Pathogenic
g.43063361G>A	c.C5165T	p.S1722F	nonsynonymous SNV	Pathogenic/Likely_pathogenic
g.43063362_43063363insG	c.5163_5164insC	p.S1722Lfs	frameshift insertion	Pathogenic
g.43063362A>G	c.T5164C	p.S1722P	nonsynonymous SNV	Likely_pathogenic
g.43063364del	c.5162delA	p.Q1721Rfs	frameshift deletion	Pathogenic
g.43063364T>G	c.A5162C	p.Q1721P	nonsynonymous SNV	Likely_pathogenic
g.43063367del	c.5161delC	p.Q1721Sfs	frameshift deletion	Likely_pathogenic
g.43063365G>A	c.C5161T	p.Q1721X	stopgain	Pathogenic
g.43063368_43063371dup	c.5158_5159insGTGA	p.T1720Sfs	frameshift insertion	Pathogenic
g.43063367_43063371delinsTTT	c.5155_5159AAA	p.V1719Kfs	frameshift substitution	Pathogenic
g.43063370_43063371del	c.5156_5157del	p.V1719Dfs	frameshift deletion	Pathogenic
g.43063369_43063370insTATT	c.5156_5157insAATA	p.T1720Ifs	frameshift insertion	Pathogenic
g.43063370del	c.5156delT	p.V1719Gfs	frameshift deletion	Pathogenic/Likely_pathogenic
g.43063374dup	c.5155dupG	p.V1719Gfs	frameshift insertion	Pathogenic
g.43063374del	c.5155delG	p.V1719fs	stopgain	Pathogenic
g.43063370_43063389delinsTATT	c.5153_5156AATA	p.W1718_Y1863del	stopgain	Likely_pathogenic
g.43063372C>A	c.G5154T	p.W1718C	nonsynonymous SNV	Likely_pathogenic
g.43063372C>T	c.G5154A	p.W1718X	stopgain	Pathogenic
g.43063373C>G	c.G5153C	p.W1718S	nonsynonymous SNV	Likely_pathogenic
g.43063373C>T	c.G5153A	p.W1718X	stopgain	Pathogenic
g.43063374C>G	c.5153-1G>C		splice site	Pathogenic
g.43063374C>T	c.5153-1G>A		splice site	Pathogenic
g.43063375del	c.5153-2A>-		splice site	Pathogenic
g.43063375T>C	c.5153-2A>G		splice site	Pathogenic/Likely_pathogenic
g.43063866_43063881delinsCTATTT	c.5145_5152AAATAG	p.S1715Rfs	frameshift substitution	Likely_pathogenic
g.43063869C>A	c.5152+5G>T		intron variant	Likely_pathogenic
g.43063869C>G	c.5152+5G>C		intron variant	Pathogenic
g.43063869C>T	c.5152+5G>A		intron variant	Pathogenic/Likely_pathogenic
g.43063870_43063871insA	c.5152+3_5152+4insT		intron variant	Pathogenic
g.43063871T>G	c.5152+3A>C		intron variant	Pathogenic
g.43063872dup	c.5152+2dupT		intron variant	Pathogenic
g.43063872A>C	c.5152+2T>G		splice site	Pathogenic
g.43063872A>G	c.5152+2T>C		splice site	Likely_pathogenic
g.43063872A>T	c.5152+2T>A		splice site	Pathogenic
g.43063873C>A	c.5152+1G>T		splice site	Pathogenic
g.43063873C>G	c.5152+1G>C		splice site	Pathogenic
g.43063873C>T	c.5152+1G>A		splice site	Pathogenic
g.43063874_43063951del	c.5075_5152del	p.D1692_W1718delinsG	nonframeshift deletion	Pathogenic
g.43063878del	c.5150delT	p.F1717Sfs	frameshift deletion	Pathogenic
g.43063877_43063878insG	c.5148_5149insC	p.F1717Lfs	frameshift insertion	Pathogenic
g.43063878_43063879insG	c.5147_5148insC	p.W1718Lfs	frameshift insertion	Pathogenic
g.43063878A>C	c.T5148G	p.Y1716X	stopgain	Pathogenic
g.43063878A>T	c.T5148A	p.Y1716X	stopgain	Pathogenic
g.43063881del	c.5145delC	p.Y1716Ifs	frameshift deletion	Pathogenic
g.43063881G>C	c.C5145G	p.S1715R	nonsynonymous SNV	Pathogenic
g.43063882C>T	c.G5144A	p.S1715N	nonsynonymous SNV	Pathogenic
g.43063883T>G	c.A5143C	p.S1715R	nonsynonymous SNV	Pathogenic
g.43063885A>C	c.T5141G	p.V1714G	nonsynonymous SNV	Likely_pathogenic
g.43063891dup	c.5137dupG	p.V1713Gfs	frameshift insertion	Pathogenic
g.43063891del	c.5137delG	p.V1713fs	stopgain	Pathogenic
g.43063890C>T	c.G5136A	p.W1712X	stopgain	Pathogenic
g.43063891C>T	c.G5135A	p.W1712X	stopgain	Pathogenic
g.43063896dup	c.5133dupA	p.W1712Mfs	frameshift insertion	Pathogenic
g.43063896del	c.5133delA	p.K1711Nfs	frameshift deletion	Pathogenic
g.43063895T>A	c.A5131T	p.K1711X	stopgain	Pathogenic
g.43063898del	c.5129delG	p.G1710Efs	frameshift deletion	Pathogenic
g.43063898C>A	c.G5128T	p.G1710X	stopgain	Pathogenic
g.43063902del	c.5126delG	p.G1709Efs	frameshift deletion	Pathogenic
g.43063903del	c.5123delC	p.A1708Gfs	frameshift deletion	Pathogenic
g.43063903G>T	c.C5123A	p.A1708E	nonsynonymous SNV	Pathogenic
g.43063905_43063912del	c.5114_5121del	p.L1705Rfs	frameshift deletion	Pathogenic
g.43063909C>T	c.G5117A	p.G1706E	nonsynonymous SNV	Pathogenic
g.43063910C>G	c.G5116C	p.G1706R	nonsynonymous SNV	Likely_pathogenic
g.43063910C>T	c.G5116A	p.G1706R	nonsynonymous SNV	Pathogenic/Likely_pathogenic
g.43063912A>G	c.T5114C	p.L1705P	nonsynonymous SNV	Pathogenic/Likely_pathogenic
g.43063917del	c.5112delT	p.L1705fs	frameshift deletion	Pathogenic
g.43063917A>C	c.T5109G	p.Y1703X	stopgain	Pathogenic
g.43063922del	c.5106delA	p.K1702Nfs	frameshift deletion	Pathogenic
g.43063923_43063924del	c.5102_5103del	p.L1701Qfs	frameshift deletion	Pathogenic
g.43063924del	c.5102delT	p.L1701Rfs	frameshift deletion	Pathogenic
g.43063928del	c.5098delA	p.T1700Hfs	frameshift deletion	Pathogenic
g.43063928T>C	c.A5098G	p.T1700A	nonsynonymous SNV	Likely_pathogenic
g.43063930C>T	c.G5096A	p.R1699Q	nonsynonymous SNV	Pathogenic
g.43063931G>A	c.C5095T	p.R1699W	nonsynonymous SNV	Pathogenic
g.43063934_43063935CA	c.5091_5092del	p.C1697fs	stopgain	Pathogenic
g.43063934C>A	c.G5092T	p.E1698X	stopgain	Likely_pathogenic
g.43063935del	c.5091delT	p.C1697Wfs	frameshift deletion	Pathogenic
g.43063937A>G	c.T5089C	p.C1697R	nonsynonymous SNV	Pathogenic
g.43063942_43063943del	c.5084_5085del	p.F1695Cfs	frameshift deletion	Pathogenic
g.43063941_43063942insC	c.5084_5085insG	p.F1695Lfs	frameshift insertion	Pathogenic
g.43063942_43063943insC	c.5083_5084insG	p.F1695Cfs	frameshift insertion	Pathogenic
g.43063946del	c.5080delG	p.E1694Sfs	frameshift deletion	Pathogenic
g.43063948_43063950del	c.5078_5080del	p.A1693del	nonframeshift deletion	Pathogenic/Likely_pathogenic
g.43063946C>A	c.G5080T	p.E1694X	stopgain	Pathogenic
g.43063946_43063949delinsGCAGAATCAA	c.5077_5080TTGATTCTGC	p.A1693_E1694delinsLILQ	nonframeshift substitution	Pathogenic
g.43063948_43063951del	c.5075_5078del	p.D1692Vfs	frameshift deletion	Pathogenic
g.43063950del	c.5076delT	p.D1692Efs	frameshift deletion	Pathogenic
g.43063952C>G	c.5075-1G>C		splice site	Pathogenic
g.43063952C>T	c.5075-1G>A		splice site	Pathogenic/Likely_pathogenic
g.43063953del	c.5075-2A>-		splice site	Pathogenic/Likely_pathogenic
g.43063953T>A	c.5075-2A>T		splice site	Pathogenic
g.43063953T>C	c.5075-2A>G		splice site	Pathogenic
g.43063953T>G	c.5075-2A>C		splice site	Pathogenic
g.43063954G>C	c.5075-3C>G		intron variant	Likely_pathogenic
g.43063959A>C	c.5075-8T>G		intron variant	Pathogenic
g.43066860_43069976del	c.4987_5074del	p.V1665Sfs	frameshift deletion	Pathogenic
g.43067266_43068273del	c.4987_5074del	p.V1665Sfs	frameshift deletion	Pathogenic
g.43067524_43070203del	c.4987_5074del	p.V1665Sfs	frameshift deletion	Pathogenic
g.43067605T>C	c.5074+3A>G		intron variant	Pathogenic/Likely_pathogenic
g.43067606A>G	c.5074+2T>C		splice site	Pathogenic
g.43067606A>T	c.5074+2T>A		splice site	Likely_pathogenic
g.43067608del	c.5074+1G>-		splice site	Likely_pathogenic
g.43067607C>A	c.5074+1G>T		splice site	Pathogenic
g.43067607C>G	c.5074+1G>C		splice site	Pathogenic
g.43067607C>T	c.5074+1G>A		splice site	Pathogenic
g.43067611_43067698del	c.4987_5074del	p.V1665Sfs	frameshift deletion	Pathogenic
g.43067608C>A	c.G5074T	p.D1692Y	nonsynonymous SNV	Pathogenic
g.43067608C>G	c.G5074C	p.D1692H	nonsynonymous SNV	Pathogenic
g.43067608C>T	c.G5074A	p.D1692N	nonsynonymous SNV	Pathogenic/Likely_pathogenic
g.43067610G>A	c.C5072T	p.T1691I	nonsynonymous SNV	Likely_pathogenic
g.43067614dup	c.5071dupA	p.T1691Nfs	frameshift insertion	Pathogenic
g.43067610G>T	c.C5072A	p.T1691K	nonsynonymous SNV	Likely_pathogenic
g.43067614T>A	c.A5068T	p.K1690X	stopgain	Pathogenic
g.43067617dup	c.5065dupA	p.M1689Nfs	frameshift insertion	Pathogenic
g.43067616A>C	c.T5066G	p.M1689R	nonsynonymous SNV	Pathogenic/Likely_pathogenic
g.43067619_43067621ACA	c.5062_5064del	p.V1688del	nonframeshift deletion	Pathogenic
g.43067620C>A	c.G5062T	p.V1688F	nonsynonymous SNV	Likely_pathogenic
g.43067622_43067623insGTTG	c.5059_5060insCAAC	p.V1687Afs	frameshift insertion	Pathogenic
g.43067623del	c.5059delG	p.V1687Lfs	frameshift deletion	Pathogenic
g.43067623_43067624insGTTG	c.5058_5059insCAAC	p.V1687Qfs	frameshift insertion	Pathogenic
g.43067626_43067629dup	c.5057_5058insCTCA	p.V1687Sfs	frameshift insertion	Pathogenic
g.43067625T>C	c.A5057G	p.H1686R	nonsynonymous SNV	Pathogenic/Likely_pathogenic
g.43067626dup	c.5056dupC	p.H1686Pfs	frameshift insertion	Pathogenic
g.43067628G>A	c.C5054T	p.T1685I	nonsynonymous SNV	Pathogenic
g.43067629_43067630dup	c.5053_5054insTA	p.T1685Ifs	frameshift insertion	Pathogenic
g.43067629T>C	c.A5053G	p.T1685A	nonsynonymous SNV	Pathogenic
g.43067631del	c.5051delC	p.T1684Ifs	frameshift deletion	Pathogenic
g.43067631_43067632del	c.5050_5051del	p.T1684Yfs	frameshift deletion	Pathogenic
g.43067634_43067638delinsA	c.5044_5048T	p.E1682fs	stopgain	Pathogenic
g.43067635C>A	c.G5047T	p.E1683X	stopgain	Pathogenic
g.43067639_43067640insTTAA	c.5043_5044insTAAT	p.E1682fs	stopgain	Pathogenic
g.43067640del	c.5042delC	p.T1681Mfs	frameshift deletion	Pathogenic
g.43067643_43067646dup	c.5041_5042insATTA	p.T1681Nfs	frameshift insertion	Pathogenic
g.43067641_43067642insTAAT	c.5041_5042insTTAA	p.T1681Ifs	frameshift insertion	Pathogenic
g.43067643del	c.5040delT	p.T1681Lfs	frameshift deletion	Pathogenic
g.43067642_43067643del	c.5039_5040del	p.I1680Nfs	frameshift deletion	Pathogenic
g.43067643_43067647ATTAG	c.5035_5039del	p.L1679fs	frameshift deletion	Pathogenic
g.43067648_43067658del	c.5026_5036del	p.L1676Nfs	frameshift deletion	Pathogenic
g.43067647del	c.5035delC	p.L1679fs	stopgain	Pathogenic
g.43067652_43067655dup	c.5033_5034insCTAA	p.L1679fs	stopgain	Pathogenic
g.43067652_43067655del	c.5030_5033del	p.T1677Ifs	frameshift deletion	Pathogenic
g.43067652_43067656del	c.5027_5031del	p.L1676fs	stopgain	Pathogenic
g.43067657dup	c.5027dupT	p.L1676Ffs	frameshift insertion	Pathogenic
g.43067657del	c.5027delT	p.L1676fs	stopgain	Pathogenic
g.43067656_43067657del	c.5026_5027del	p.L1676Nfs	frameshift deletion	Pathogenic
g.43067655A>C	c.T5027G	p.L1676X	stopgain	Pathogenic
g.43067655A>T	c.T5027A	p.L1676X	stopgain	Pathogenic
g.43067661dup	c.5021dupT	p.T1675Hfs	frameshift insertion	Pathogenic
g.43067663del	c.5019delC	p.H1673Qfs	frameshift deletion	Pathogenic
g.43067672dup	c.5013dupA	p.H1672Tfs	frameshift insertion	Pathogenic
g.43067673_43067674insG	c.5008_5009insC	p.R1670Tfs	frameshift insertion	Pathogenic
g.43067676dup	c.5007dupC	p.R1670Qfs	frameshift insertion	Pathogenic
g.43067675_43067687dup	c.5007_5008insGTACAAGTTTGCC	p.R1670Vfs	frameshift insertion	Pathogenic
g.43067677del	c.5005delG	p.A1669Pfs	frameshift deletion	Pathogenic
g.43067683T>A	c.A4999T	p.K1667X	stopgain	Pathogenic
g.43067685dup	c.4997dupA	p.Y1666fs	stopgain	Pathogenic
g.43067685_43067686dup	c.4997_4998insTA	p.K1667Tfs	frameshift insertion	Pathogenic
g.43067684G>T	c.C4998A	p.Y1666X	stopgain	Pathogenic
g.43067695del	c.4987delA	p.M1663Cfs	frameshift deletion	Pathogenic
g.43067696%3D	c.4987-1G>G		splice site	Pathogenic
g.43067696C>A	c.4987-1G>T		splice site	Pathogenic
g.43067696C>G	c.4987-1G>C		splice site	Likely_pathogenic
g.43067696C>T	c.4987-1G>A		splice site	Pathogenic
g.43067697T>C	c.4987-2A>G		splice site	Pathogenic
g.43067697T>G	c.4987-2A>C		splice site	Pathogenic/Likely_pathogenic
g.43067700A>T	c.4987-5T>A		intron variant	Pathogenic
g.43070037_43072667del	c.4676_4986del	p.E1559Dfs	frameshift deletion	Pathogenic
g.43070922A>C	c.4986+6T>C		intron variant	Pathogenic
g.43070922A>G	c.4986+6T>G		intron variant	Pathogenic/Likely_pathogenic
g.43070923C>G	c.4986+5G>C		intron variant	Pathogenic
g.43070923C>T	c.4986+5G>A		intron variant	Pathogenic/Likely_pathogenic
g.43070924T>A	c.4986+4A>T		intron variant	Pathogenic/Likely_pathogenic
g.43070924T>C	c.4986+4A>G		intron variant	Likely_pathogenic
g.43070924T>G	c.4986+4A>C		intron variant	Pathogenic/Likely_pathogenic
g.43070925_43070926CA	c.4986+2_4986+3del		splice site	Pathogenic
g.43070925C>G	c.4986+3G>C		intron variant	Pathogenic/Likely_pathogenic
g.43070926A>G	c.4986+2T>C		splice site	Pathogenic
g.43070927C>A	c.4986+1G>T		splice site	Pathogenic
g.43070930dup	c.4986+1->T		splice site	Pathogenic
g.43070927C>T	c.4986+1G>A		splice site	Pathogenic
g.43070931_43070949del	c.4966_4984del	p.G1656Lfs	frameshift deletion	Pathogenic
g.43070932_43070950del	c.4964_4982del	p.S1655Yfs	frameshift deletion	Pathogenic
g.43070933C>A	c.G4981T	p.E1661X	stopgain	Pathogenic
g.43070935_43070950del	c.4964_4979del	p.S1655fs	stopgain	Pathogenic
g.43070941del	c.4976delC	p.P1659Qfs	frameshift deletion	Pathogenic
g.43070942del	c.4972delA	p.T1658Pfs	frameshift deletion	Pathogenic
g.43070946del	c.4969delC	p.L1657fs	stopgain	Pathogenic
g.43070950G>A	c.C4964T	p.S1655F	nonsynonymous SNV	Pathogenic/Likely_pathogenic
g.43070968_43070970del	c.4946_4948del	p.R1649del	nonframeshift deletion	Pathogenic
g.43070967_43070969delinsAAAA	c.4945_4947TTTT	p.R1649Ffs	frameshift substitution	Pathogenic
g.43070972del	c.4945delA	p.R1649Efs	frameshift deletion	Pathogenic
g.43070971_43070972del	c.4944_4945del	p.R1649Nfs	frameshift deletion	Pathogenic
g.43070969_43070970insAAAA	c.4944_4945insTTTT	p.R1649Ffs	stopgain	Pathogenic
g.43070972T>A	c.A4942T	p.K1648X	stopgain	Pathogenic
g.43070973del	c.4941delC	p.N1647Kfs	frameshift deletion	Pathogenic
g.43070975_43071056del	c.4860_4941del	p.D1621Kfs	frameshift deletion	Pathogenic
g.43070980del	c.4936delG	p.V1646Sfs	frameshift deletion	Pathogenic
g.43070978_43070979insTT	c.4935_4936insAA	p.V1646Kfs	frameshift insertion	Pathogenic
g.43070979_43070980insTT	c.4934_4935insAA	p.V1646Rfs	frameshift insertion	Pathogenic
g.43070982_43070983dup	c.4933_4934insAA	p.R1645Kfs	frameshift insertion	Pathogenic
g.43070984C>A	c.G4930T	p.E1644X	stopgain	Pathogenic
g.43070993del	c.4921delG	p.A1641Lfs	frameshift deletion	Pathogenic
g.43070995_43071013del	c.4901_4919del	p.R1634Kfs	frameshift deletion	Pathogenic
g.43071005del	c.4910delC	p.P1637Qfs	frameshift deletion	Pathogenic
g.43071008_43071009TC	c.4905_4906del	p.K1636Afs	frameshift deletion	Pathogenic
g.43071013dup	c.4903dupG	p.E1635Gfs	frameshift insertion	Pathogenic
g.43071013del	c.4903delG	p.E1635Rfs	frameshift deletion	Pathogenic
g.43071011C>A	c.G4903T	p.E1635X	stopgain	Pathogenic
g.43071019_43071020AC	c.4895_4896del	p.V1632Efs	frameshift deletion	Pathogenic
g.43071021_43071027del	c.4887_4893del	p.E1630fs	frameshift deletion	Pathogenic
g.43071025dup	c.4891dupA	p.S1631Kfs	frameshift insertion	Pathogenic
g.43071025del	c.4891delA	p.S1631Vfs	frameshift deletion	Pathogenic
g.43071026_43071027del	c.4888_4889del	p.E1630Kfs	frameshift deletion	Pathogenic
g.43071026C>A	c.G4888T	p.E1630X	stopgain	Likely_pathogenic
g.43071030dup	c.4885dupG	p.E1629Gfs	frameshift insertion	Pathogenic
g.43071030del	c.4885delG	p.E1629Kfs	frameshift deletion	Pathogenic
g.43071031_43071043del	c.4873_4885del	p.Y1625Kfs	frameshift deletion	Pathogenic
g.43071036dup	c.4878dupT	p.A1627Cfs	frameshift insertion	Pathogenic
g.43071038del	c.4877delA	p.N1626Mfs	frameshift deletion	Pathogenic
g.43071039A>T	c.T4875A	p.Y1625X	stopgain	Pathogenic
g.43071044_43071053del	c.4862_4871del	p.D1621Gfs	frameshift deletion	Pathogenic/Likely_pathogenic
g.43071043_43071044insT	c.4870_4871insA	p.G1624Efs	frameshift insertion	Likely_pathogenic
g.43071046G>C	c.C4868G	p.A1623G	nonsynonymous SNV	Pathogenic/Likely_pathogenic
g.43071071dup	c.4843dupG	p.A1615Gfs	frameshift insertion	Pathogenic
g.43071074dup	c.4841dupC	p.A1615Sfs	frameshift insertion	Pathogenic
g.43071075_43071076insG	c.4838_4839insC	p.P1614Sfs	frameshift insertion	Pathogenic
g.43071077del	c.4837delA	p.S1613Vfs	frameshift deletion	Pathogenic
g.43071076_43071077delinsGGC	c.4837_4838GCC	p.S1613Afs	frameshift substitution	Pathogenic
g.43071078dup	c.4836dupG	p.S1613Efs	frameshift insertion	Pathogenic
g.43071079_43071080del	c.4834_4835del	p.Q1612Efs	frameshift deletion	Pathogenic
g.43071082del	c.4834delC	p.Q1612Rfs	frameshift deletion	Pathogenic
g.43071080G>A	c.C4834T	p.Q1612X	stopgain	Pathogenic
g.43071085del	c.4829delC	p.S1610Lfs	frameshift deletion	Pathogenic
g.43071086dup	c.4828dupT	p.S1610Ffs	frameshift insertion	Pathogenic
g.43071090_43071091insC	c.4823_4824insG	p.E1609Rfs	frameshift insertion	Pathogenic
g.43071092dup	c.4822dupG	p.A1608Gfs	frameshift insertion	Pathogenic
g.43071098del	c.4818delA	p.V1607Lfs	frameshift deletion	Pathogenic
g.43071102_43071103insAAAT	c.4814_4815insTATT	p.L1605Ffs	frameshift insertion	Pathogenic
g.43071107del	c.4810delC	p.Q1604Nfs	frameshift deletion	Pathogenic/Likely_pathogenic
g.43071104G>A	c.C4810T	p.Q1604X	stopgain	Pathogenic
g.43071109del	c.4806delT	p.Q1604Nfs	frameshift deletion	Pathogenic
g.43071113del	c.4803delA	p.V1602Ffs	frameshift deletion	Pathogenic
g.43071113T>A	c.A4801T	p.K1601X	stopgain	Pathogenic
g.43071116dup	c.4799dupT	p.L1600Ffs	frameshift insertion	Pathogenic
g.43071124del	c.4791delC	p.S1598Lfs	frameshift deletion	Pathogenic
g.43071127G>T	c.C4787A	p.S1596X	stopgain	Pathogenic
g.43071130del	c.4784delC	p.S1595Ffs	frameshift deletion	Pathogenic
g.43071132del	c.4782delA	p.S1595Lfs	frameshift deletion	Pathogenic
g.43071135_43071139delinsG	c.4775_4779C	p.N1592Tfs	frameshift substitution	Pathogenic
g.43071150_43071151del	c.4764_4765del	p.R1589Cfs	frameshift deletion	Pathogenic
g.43071150del	c.4764delT	p.R1589Vfs	frameshift deletion	Pathogenic
g.43071154G>C	c.C4760G	p.S1587X	stopgain	Pathogenic
g.43071154_43071155insT	c.4759_4760insA	p.S1587Yfs	frameshift insertion	Pathogenic
g.43071155_43071156insT	c.4758_4759insA	p.S1587Ifs	frameshift insertion	Pathogenic
g.43071158C>A	c.G4756T	p.E1586X	stopgain	Pathogenic
g.43071159del	c.4755delA	p.E1586Sfs	frameshift deletion	Pathogenic
g.43071159_43071160del	c.4754_4755del	p.P1585Rfs	frameshift deletion	Pathogenic
g.43071163dup	c.4754dupC	p.E1586Rfs	frameshift insertion	Pathogenic
g.43071164del	c.4750delG	p.A1584Pfs	frameshift deletion	Pathogenic
g.43071164_43071165CT	c.4749_4750del	p.R1583Sfs	frameshift deletion	Pathogenic
g.43071169del	c.4745delA	p.D1582Afs	frameshift deletion	Pathogenic
g.43071172del	c.4743delA	p.D1582Tfs	frameshift deletion	Pathogenic
g.43071173C>A	c.G4741T	p.E1581X	stopgain	Pathogenic
g.43071177_43071180del	c.4736_4739del	p.P1579Lfs	frameshift deletion	Pathogenic
g.43071192del	c.4724delC	p.P1575Lfs	frameshift deletion	Pathogenic
g.43071197del	c.4717delG	p.D1573Mfs	frameshift deletion	Pathogenic
g.43071202_43071206del	c.4712_4716del	p.F1571fs	stopgain	Pathogenic
g.43071203del	c.4712delT	p.F1571Sfs	frameshift deletion	Pathogenic
g.43071205dup	c.4709dupT	p.F1571Lfs	frameshift insertion	Pathogenic
g.43071204_43071214delinsT	c.4700_4710A	p.G1567Dfs	frameshift substitution	Pathogenic
g.43071206_43071215del	c.4699_4708del	p.G1567Sfs	frameshift deletion	Pathogenic
g.43071211_43071217ATTCCAG	c.4704_4705insTGGAATC	p.S1569Wfs	frameshift insertion	Pathogenic
g.43071214_43071215dup	c.4700_4701insGG	p.I1568Efs	frameshift insertion	Pathogenic
g.43071216_43071217insT	c.4697_4698insA	p.G1567Wfs	frameshift insertion	Pathogenic
g.43071217_43071218insT	c.4696_4697insA	p.S1566Yfs	frameshift insertion	Pathogenic
g.43071220dup	c.4695dupA	p.S1566Ifs	frameshift insertion	Pathogenic
g.43071220_43071226delinsC	c.4688_4694G	p.Y1563_Y1863del	stopgain	Pathogenic
g.43071225G>C	c.C4689G	p.Y1563X	stopgain	Pathogenic
g.43071226dup	c.4688dupA	p.Y1563fs	stopgain	Pathogenic
g.43071231_43071232del	c.4684_4685del	p.P1562Lfs	frameshift deletion	Pathogenic
g.43071234del	c.4681delA	p.T1561Pfs	frameshift deletion	Pathogenic
g.43071236_43071237del	c.4678_4679del	p.G1560Nfs	frameshift deletion	Pathogenic
g.43071236C>A	c.G4678T	p.G1560X	stopgain	Pathogenic
g.43071239C>A	c.4676-1G>T		splice site	Pathogenic
g.43071239C>G	c.4676-1G>C		splice site	Likely_pathogenic
g.43071239C>T	c.4676-1G>A		splice site	Pathogenic
g.43071240T>C	c.4676-2A>G		splice site	Pathogenic/Likely_pathogenic
g.43071240T>G	c.4676-2A>C		splice site	Likely_pathogenic
g.43074328T>A	c.4675+3A>T		intron variant	Pathogenic
g.43074336_43074526del	c.4487_4675del	p.S1496_Y1863del	stopgain	Pathogenic
g.43074329A>C	c.4675+2T>G		splice site	Likely_pathogenic
g.43074329A>G	c.4675+2T>C		splice site	Pathogenic
g.43074329A>T	c.4675+2T>A		splice site	Pathogenic
g.43074330C>A	c.4675+1G>T		splice site	Pathogenic
g.43074330_43074331insT	c.4675+1->A		splice site	Pathogenic
g.43074330C>G	c.4675+1G>C		splice site	Pathogenic
g.43074330C>T	c.4675+1G>A		splice site	Pathogenic
g.43074332dup	c.4674dupA	p.E1559Rfs	frameshift insertion	Pathogenic
g.43074331C>G	c.G4675C	p.E1559Q	nonsynonymous SNV	Pathogenic/Likely_pathogenic
g.43074331C>T	c.G4675A	p.E1559K	nonsynonymous SNV	Pathogenic
g.43074332del	c.4674delA	p.E1559Rfs	frameshift deletion	Pathogenic
g.43074337_43074356del	c.4654_4673del	p.Y1552Rfs	frameshift deletion	Pathogenic
g.43074334del	c.4672delC	p.L1558fs	stopgain	Pathogenic
g.43074339dup	c.4668dupA	p.D1557Rfs	frameshift insertion	Pathogenic
g.43074340G>A	c.C4666T	p.Q1556X	stopgain	Pathogenic
g.43074343_43074362del	c.4646_4665del	p.E1549Afs	frameshift deletion	Pathogenic
g.43074344del	c.4663delA	p.R1555Gfs	frameshift deletion	Pathogenic
g.43074349del	c.4658delT	p.L1553Cfs	frameshift deletion	Pathogenic
g.43074351_43074354del	c.4655_4658del	p.Y1552Cfs	frameshift deletion	Pathogenic
g.43074350del	c.4656delC	p.L1553Cfs	frameshift deletion	Pathogenic
g.43074350G>C	c.C4656G	p.Y1552X	stopgain	Pathogenic
g.43074351dup	c.4655dupA	p.Y1552fs	stopgain	Pathogenic
g.43074351_43074352insC	c.4654_4655insG	p.Y1552fs	stopgain	Pathogenic
g.43074351_43074352insG	c.4654_4655insC	p.Y1552Sfs	frameshift insertion	Pathogenic
g.43074359_43074360dup	c.4648_4649insAA	p.T1550Kfs	frameshift insertion	Pathogenic
g.43074371del	c.4635delC	p.H1545Qfs	frameshift deletion	Pathogenic
g.43074375_43074384del	c.4623_4632del	p.E1541Dfs	frameshift deletion	Likely_pathogenic
g.43074381_43074382del	c.4625_4626del	p.S1542Wfs	frameshift deletion	Pathogenic
g.43074383_43074384CT	c.4622_4623del	p.E1541Vfs	frameshift deletion	Pathogenic
g.43074385C>A	c.G4621T	p.E1541X	stopgain	Pathogenic
g.43074385_43074388delinsTTT	c.4618_4621AAA	p.E1540Kfs	frameshift substitution	Pathogenic
g.43074388C>A	c.G4618T	p.E1540X	stopgain	Pathogenic
g.43074390dup	c.4616dupT	p.E1540Gfs	frameshift insertion	Pathogenic
g.43074393_43074394insC	c.4612_4613insG	p.Q1538Rfs	frameshift insertion	Pathogenic
g.43074394G>A	c.C4612T	p.Q1538X	stopgain	Pathogenic
g.43074394_43074395insC	c.4611_4612insG	p.Q1538Afs	frameshift insertion	Pathogenic
g.43074395_43074396insGG	c.4610_4611insCC	p.Q1537Hfs	frameshift insertion	Pathogenic
g.43074397_43074398insGG	c.4609_4610insCC	p.Q1537Pfs	frameshift insertion	Pathogenic
g.43074397G>A	c.C4609T	p.Q1537X	stopgain	Pathogenic
g.43074400C>A	c.G4606T	p.E1536X	stopgain	Pathogenic
g.43074403C>A	c.G4603T	p.E1535X	stopgain	Pathogenic
g.43074410_43074411insGA	c.4596_4597insCT	p.D1533Lfs	frameshift insertion	Pathogenic
g.43074411_43074412insGA	c.4595_4596insCT	p.D1533Lfs	frameshift insertion	Pathogenic
g.43074414dup	c.4593dupT	p.V1532Cfs	frameshift insertion	Pathogenic
g.43074416del	c.4591delG	p.V1531Lfs	frameshift deletion	Pathogenic
g.43074416_43074419del	c.4587_4590del	p.I1529Mfs	frameshift deletion	Pathogenic
g.43074425_43074435del	c.4575_4585del	p.Q1525Hfs	frameshift deletion	Pathogenic
g.43074430C>A	c.G4576T	p.E1526X	stopgain	Pathogenic
g.43074431_43074432del	c.4574_4575del	p.Q1525Rfs	frameshift deletion	Pathogenic
g.43074433G>A	c.C4573T	p.Q1525X	stopgain	Pathogenic
g.43074434_43074437del	c.4569_4572del	p.S1524Kfs	frameshift deletion	Pathogenic
g.43074435_43074436insGG	c.4571_4572insCC	p.Q1525Lfs	frameshift insertion	Pathogenic
g.43074436del	c.4570delT	p.S1524Lfs	frameshift deletion	Pathogenic
g.43074436_43074437insGG	c.4569_4570insCC	p.S1524Pfs	frameshift insertion	Pathogenic
g.43074440del	c.4568delC	p.P1523Hfs	frameshift deletion	Likely_pathogenic
g.43074440G>C	c.C4566G	p.Y1522X	stopgain	Pathogenic
g.43074440G>T	c.C4566A	p.Y1522X	stopgain	Pathogenic
g.43074454G>A	c.C4552T	p.Q1518X	stopgain	Pathogenic
g.43074467G>T	c.C4539A	p.C1513X	stopgain	Pathogenic
g.43074471_43074472del	c.4534_4535del	p.S1512Lfs	frameshift deletion	Pathogenic
g.43074472del	c.4534delA	p.S1512Vfs	frameshift deletion	Pathogenic/Likely_pathogenic
g.43074472_43074473TG	c.4533_4534del	p.H1511Qfs	frameshift deletion	Pathogenic
g.43074474dup	c.4532dupA	p.H1511Qfs	frameshift insertion	Pathogenic
g.43074478del	c.4528delA	p.M1510Cfs	frameshift deletion	Pathogenic
g.43074479G>T	c.C4527A	p.Y1509X	stopgain	Pathogenic
g.43074480_43074483delinsCTCATCTAATGATGGGCA	c.4523_4526TGCCCATCATTAGATGAG	p.W1508Lfs	stopgain	Pathogenic
g.43074482C>T	c.G4524A	p.W1508X	stopgain	Pathogenic
g.43074483C>T	c.G4523A	p.W1508X	stopgain	Pathogenic
g.43074490del	c.4516delG	p.D1506Ifs	frameshift deletion	Pathogenic
g.43074495_43074499del	c.4507_4511del	p.S1503Rfs	frameshift deletion	Pathogenic
g.43074498G>C	c.C4508G	p.S1503X	stopgain	Pathogenic
g.43074498G>T	c.C4508A	p.S1503X	stopgain	Pathogenic
g.43074503del	c.4505delC	p.P1502Hfs	frameshift deletion	Pathogenic
g.43074503G>T	c.C4503A	p.C1501X	stopgain	Pathogenic
g.43074516del	c.4493delC	p.P1498Lfs	frameshift deletion	Pathogenic
g.43074519G>C	c.C4487G	p.S1496X	stopgain	Pathogenic
g.43074519G>T	c.C4487A	p.S1496X	stopgain	Pathogenic
g.43074520del	c.4486delT	p.S1496Hfs	frameshift deletion	Pathogenic
g.43074522C>A	c.4485-1G>T		splice site	Pathogenic
g.43074522C>G	c.4485-1G>C		splice site	Pathogenic
g.43074522C>T	c.4485-1G>A		splice site	Pathogenic/Likely_pathogenic
g.43074523T>A	c.4485-2A>T		splice site	Pathogenic/Likely_pathogenic
g.43074523T>C	c.4485-2A>G		splice site	Pathogenic/Likely_pathogenic
g.43074523T>G	c.4485-2A>C		splice site	Likely_pathogenic
g.43076483C>G	c.4484+5G>C		intron variant	Pathogenic
g.43076486A>G	c.4484+2T>C		splice site	Pathogenic
g.43076488del	c.4484+1G>-		splice site	Pathogenic
g.43076487C>A	c.4484+1G>T		splice site	Pathogenic
g.43076487C>T	c.4484+1G>A		splice site	Pathogenic
g.43076492_43076618del	c.4358_4484del	p.A1453Gfs	frameshift deletion	Pathogenic
g.43076488C>A	c.G4484T	p.R1495M	nonsynonymous SNV	Pathogenic
g.43076488C>G	c.G4484C	p.R1495T	nonsynonymous SNV	Pathogenic
g.43076488C>T	c.G4484A	p.R1495K	nonsynonymous SNV	Pathogenic/Likely_pathogenic
g.43076491del	c.4483delA	p.R1495Gfs	frameshift deletion	Pathogenic
g.43076490_43076491del	c.4482_4483del	p.R1495Vfs	frameshift deletion	Pathogenic
g.43076492C>A	c.G4480T	p.E1494X	stopgain	Pathogenic
g.43076498_43076519del	c.4453_4474del	p.T1485Efs	frameshift deletion	Pathogenic
g.43076498C>A	c.G4474T	p.G1492X	stopgain	Pathogenic
g.43076504C>A	c.G4468T	p.E1490X	stopgain	Pathogenic
g.43076513dup	c.4463dupA	p.N1488Kfs	frameshift insertion	Pathogenic
g.43076515del	c.4457delG	p.S1486Ifs	frameshift deletion	Pathogenic
g.43076516del	c.4456delA	p.S1486Vfs	frameshift deletion	Pathogenic
g.43076518_43076521del	c.4452_4455del	p.T1485Vfs	frameshift deletion	Pathogenic
g.43076525del	c.4447delA	p.S1483Vfs	frameshift deletion	Pathogenic
g.43076534dup	c.4438dupT	p.S1480Ffs	frameshift insertion	Pathogenic
g.43076538del	c.4435delG	p.V1479Cfs	frameshift deletion	Pathogenic
g.43076540C>A	c.G4432T	p.E1478X	stopgain	Pathogenic
g.43076546dup	c.4427dupA	p.F1477Vfs	frameshift insertion	Pathogenic
g.43076557del	c.4417delT	p.S1473Lfs	frameshift deletion	Pathogenic
g.43076554_43076572delinsAAA	c.4400_4418TTT	p.Q1467Lfs	frameshift substitution	Pathogenic
g.43076555_43076556delinsC	c.4416_4417G	p.S1473Lfs	frameshift substitution	Pathogenic
g.43076559del	c.4414delC	p.L1472Ffs	frameshift deletion	Pathogenic
g.43076561del	c.4412delG	p.G1471Afs	frameshift deletion	Pathogenic
g.43076563dup	c.4410dupA	p.G1471Rfs	frameshift insertion	Pathogenic
g.43076564C>A	c.G4408T	p.E1470X	stopgain	Pathogenic
g.43076567dup	c.4406dupC	p.E1470Rfs	frameshift insertion	Pathogenic
g.43076569_43076581delinsAA	c.4391_4403TT	p.P1464Lfs	frameshift substitution	Pathogenic
g.43076571del	c.4401delG	p.N1468Ifs	frameshift deletion	Pathogenic
g.43076573G>A	c.C4399T	p.Q1467X	stopgain	Pathogenic
g.43076573_43076574insT	c.4398_4399insA	p.Q1467Tfs	frameshift insertion	Pathogenic
g.43076574_43076575insT	c.4397_4398insA	p.S1466Rfs	frameshift insertion	Pathogenic
g.43076577dup	c.4396dupA	p.S1466Kfs	frameshift insertion	Pathogenic/Likely_pathogenic
g.43076578dup	c.4394dupT	p.S1466Kfs	frameshift insertion	Pathogenic
g.43076579del	c.4393delA	p.I1465fs	stopgain	Pathogenic
g.43076580_43076583dup	c.4392_4393insCCCT	p.I1465Pfs	frameshift insertion	Pathogenic
g.43076580del	c.4392delT	p.I1465fs	frameshift deletion	Pathogenic
g.43076579_43076581delinsAA	c.4391_4393TT	p.P1464Lfs	frameshift substitution	Pathogenic
g.43076583dup	c.4391dupC	p.I1465Yfs	frameshift insertion	Pathogenic
g.43076583del	c.4391delC	p.P1464Lfs	frameshift deletion	Pathogenic
g.43076585_43076601del	c.4373_4389del	p.Q1458Pfs	frameshift deletion	Pathogenic
g.43076583G>C	c.C4389G	p.Y1463X	stopgain	Pathogenic
g.43076586_43076592dup	c.4388_4389insGTGAATA	p.Y1463fs	stopgain	Pathogenic
g.43076583G>T	c.C4389A	p.Y1463X	stopgain	Pathogenic
g.43076585del	c.4387delT	p.Y1463Tfs	frameshift deletion	Pathogenic
g.43076587dup	c.4386dupA	p.Y1463Ifs	frameshift insertion	Pathogenic
g.43076593del	c.4379delG	p.S1460Ifs	frameshift deletion	Pathogenic
g.43076597T>A	c.A4375T	p.K1459X	stopgain	Pathogenic
g.43076599_43076600TG	c.4372_4373del	p.Q1458Efs	frameshift deletion	Pathogenic
g.43076600G>A	c.C4372T	p.Q1458X	stopgain	Pathogenic
g.43076602G>C	c.C4370G	p.S1457X	stopgain	Pathogenic
g.43076602G>T	c.C4370A	p.S1457X	stopgain	Pathogenic
g.43076608A>C	c.T4364G	p.L1455X	stopgain	Pathogenic
g.43079400C>T	c.4358-2786G>A		splice site	Likely_pathogenic
g.43080387_43084221del	c.4186_4357del	p.R1397fs	frameshift deletion	Pathogenic
g.43080468_43083426del	c.4186_4357del	p.R1397fs	frameshift deletion	Pathogenic
g.43082395_43082404del	c.4357+1_4357+10del		splice site	Pathogenic
g.43082398A>G	c.4357+6T>C		intron variant	Pathogenic
g.43082402A>C	c.4357+2T>G		splice site	Pathogenic/Likely_pathogenic
g.43082402A>G	c.4357+2T>C		splice site	Pathogenic
g.43082404del	c.4357+1G>-		splice site	Pathogenic
g.43082403C>A	c.4357+1G>T		splice site	Pathogenic
g.43082403C>G	c.4357+1G>C		splice site	Likely_pathogenic
g.43082403C>T	c.4357+1G>A		splice site	Pathogenic
g.43082409del	c.4356delA	p.A1453Qfs	frameshift deletion	Likely_pathogenic
g.43082407T>A	c.A4354T	p.K1452X	stopgain	Pathogenic
g.43082412G>C	c.C4349G	p.S1450X	stopgain	Pathogenic
g.43082413dup	c.4348dupT	p.S1450Ffs	frameshift insertion	Pathogenic
g.43082413del	c.4348delT	p.S1450Qfs	frameshift deletion	Pathogenic
g.43082421dup	c.4342dupA	p.S1448Kfs	frameshift insertion	Pathogenic
g.43082422G>A	c.C4339T	p.Q1447X	stopgain	Pathogenic
g.43082423_43082426dup	c.4338_4339insAGAA	p.Q1447Rfs	frameshift insertion	Pathogenic
g.43082426_43082433del	c.4331_4338del	p.N1444Tfs	frameshift deletion	Pathogenic
g.43082429_43082430del	c.4331_4332del	p.N1444Tfs	frameshift deletion	Pathogenic
g.43082434G>A	c.C4327T	p.R1443X	stopgain	Pathogenic
g.43082441dup	c.4321dupG	p.D1441Gfs	frameshift insertion	Pathogenic
g.43082441del	c.4321delG	p.D1441Tfs	frameshift deletion	Pathogenic
g.43082451del	c.4310delC	p.S1437Lfs	frameshift deletion	Pathogenic
g.43082453del	c.4309delT	p.S1437Lfs	frameshift deletion	Pathogenic
g.43082453_43082454AG	c.4307_4308del	p.S1436Ffs	frameshift deletion	Pathogenic
g.43082462dup	c.4300dupA	p.S1434Kfs	frameshift insertion	Pathogenic
g.43082466_43082472del	c.4290_4296del	p.S1431fs	frameshift deletion	Pathogenic
g.43082474dup	c.4289dupC	p.S1431Ffs	frameshift insertion	Pathogenic
g.43082474_43082475insC	c.4286_4287insG	p.Y1429fs	stopgain	Pathogenic
g.43082474G>T	c.C4287A	p.Y1429X	stopgain	Pathogenic
g.43082476dup	c.4285dupT	p.Y1429Lfs	frameshift insertion	Pathogenic
g.43082475_43082476insC	c.4285_4286insG	p.Y1429fs	stopgain	Pathogenic
g.43082476_43082477insC	c.4284_4285insG	p.Y1429Vfs	frameshift insertion	Pathogenic
g.43082476_43082477delinsC	c.4284_4285G	p.S1428Rfs	frameshift substitution	Pathogenic
g.43082478dup	c.4283dupG	p.S1428Rfs	frameshift insertion	Pathogenic
g.43082478_43082479del	c.4282_4283del	p.S1428Lfs	frameshift deletion	Pathogenic
g.43082479del	c.4282delA	p.S1428Afs	frameshift deletion	Pathogenic
g.43082517_43082518insAGTTAGAAGGCTGGCTCCCATGCTGTTCTAACACAGCTT	c.4281_4282insTAAGCTGTGTTAGAACAGCATGGGAGCCAGCCTTCTAAC	p.S1428_Y1863del	stopgain	Pathogenic
g.43082486del	c.4276delT	p.S1426Lfs	frameshift deletion	Pathogenic
g.43082491G>A	c.C4270T	p.Q1424X	stopgain	Pathogenic
g.43082498_43082571del	c.4194_4267del	p.D1398Efs	frameshift deletion	Pathogenic
g.43082497dup	c.4266dupG	p.S1423Efs	frameshift insertion	Pathogenic
g.43082497del	c.4266delG	p.S1423Afs	frameshift deletion	Pathogenic
g.43082503G>A	c.C4258T	p.Q1420X	stopgain	Pathogenic
g.43082506C>A	c.G4255T	p.E1419X	stopgain	Pathogenic
g.43082508A>C	c.T4253G	p.L1418X	stopgain	Pathogenic
g.43082510_43082511CA	c.4251_4252del	p.L1418Rfs	frameshift deletion	Pathogenic
g.43082511del	c.4250delT	p.V1417Gfs	frameshift deletion	Pathogenic
g.43082517_43082518insA	c.4243_4244insT	p.E1415Vfs	frameshift insertion	Pathogenic
g.43082518del	c.4243delG	p.E1415Kfs	frameshift deletion	Pathogenic
g.43082518C>A	c.G4243T	p.E1415X	stopgain	Pathogenic
g.43082521dup	c.4240dupC	p.L1414Pfs	frameshift insertion	Pathogenic
g.43082523del	c.4239delA	p.E1413Dfs	frameshift deletion	Pathogenic
g.43082524C>A	c.G4237T	p.E1413X	stopgain	Pathogenic
g.43082529A>G	c.T4232C	p.M1411T	nonsynonymous SNV	Likely_pathogenic
g.43082533C>A	c.G4228T	p.E1410X	stopgain	Pathogenic
g.43082536G>A	c.C4225T	p.Q1409X	stopgain	Pathogenic
g.43082537C>G	c.G4224C	p.Q1408H	nonsynonymous SNV	Likely_pathogenic
g.43082539G>A	c.C4222T	p.Q1408X	stopgain	Pathogenic
g.43082543del	c.4218delG	p.K1406Nfs	frameshift deletion	Pathogenic
g.43082545T>A	c.A4216T	p.K1406X	stopgain	Pathogenic
g.43082547dup	c.4214dupT	p.L1407Afs	frameshift insertion	Pathogenic
g.43082547del	c.4214delT	p.I1405Kfs	frameshift deletion	Pathogenic
g.43082550del	c.4211delT	p.L1404Rfs	frameshift deletion	Likely_pathogenic
g.43082552del	c.4210delC	p.L1404fs	stopgain	Pathogenic
g.43082555_43082556del	c.4206_4207del	p.H1402Qfs	frameshift deletion	Pathogenic
g.43082556del	c.4205delA	p.H1402Lfs	frameshift deletion	Pathogenic
g.43082560G>A	c.C4201T	p.Q1401X	stopgain	Pathogenic
g.43082565del	c.4197delC	p.M1400Cfs	frameshift deletion	Pathogenic
g.43082564_43082565delinsA	c.4196_4197T	p.T1399Ifs	frameshift substitution	Pathogenic
g.43082565_43082566del	c.4195_4196del	p.T1399Hfs	frameshift deletion	Pathogenic
g.43082566del	c.4195delA	p.T1399Pfs	frameshift deletion	Pathogenic
g.43082566_43082567insCC	c.4194_4195insGG	p.T1399Gfs	frameshift insertion	Pathogenic
g.43082567_43082568insCC	c.4193_4194insGG	p.D1398Efs	frameshift insertion	Pathogenic
g.43082575G>A	c.C4186T	p.Q1396X	stopgain	Pathogenic
g.43086839G>A	c.4185+4105C>T		intron variant	Likely_pathogenic
g.43090878_43091113del	c.4097_4185del	p.G1366Afs	frameshift deletion	Pathogenic
g.43090922_43090942delinsT	c.4185+2_4185+22delinsA		splice site	Pathogenic
g.43090942_43090945del	c.4185delG	p.Q1395Hfs	frameshift deletion	Pathogenic
g.43090942A>G	c.4185+2T>C		splice site	Pathogenic
g.43090942A>T	c.4185+2T>A		splice site	Pathogenic
g.43090944del	c.4185+1G>-		splice site	Pathogenic
g.43090943C>A	c.4185+1G>T		splice site	Pathogenic
g.43090943C>G	c.4185+1G>C		splice site	Likely_pathogenic
g.43090943C>T	c.4185+1G>A		splice site	Pathogenic
g.43090944C>G	c.G4185C	p.Q1395H	nonsynonymous SNV	Likely_pathogenic
g.43090947_43090948dup	c.4183_4184insTC	p.Q1395Lfs	frameshift insertion	Pathogenic
g.43090947_43090948del	c.4182_4183del	p.Q1395Afs	frameshift deletion	Pathogenic
g.43090946G>A	c.C4183T	p.Q1395X	stopgain	Pathogenic
g.43090957del	c.4175delT	p.L1392fs	stopgain	Pathogenic
g.43090959_43090962del	c.4167_4170del	p.S1389Rfs	frameshift deletion	Pathogenic
g.43090960_43090961dup	c.4169_4170insGA	p.D1390Efs	frameshift insertion	Pathogenic
g.43090960_43090961del	c.4168_4169del	p.D1390Hfs	frameshift deletion	Pathogenic
g.43090962_43090963del	c.4167_4168del	p.S1389Rfs	frameshift deletion	Pathogenic
g.43090961_43090962insCT	c.4167_4168insAG	p.D1390Rfs	frameshift insertion	Pathogenic
g.43090962del	c.4167delT	p.S1389Rfs	frameshift deletion	Pathogenic
g.43090963_43090964CT	c.4166_4167insAG	p.S1389Rfs	frameshift insertion	Pathogenic
g.43090963_43090964CT	c.4165_4166del	p.S1389fs	frameshift deletion	Pathogenic
g.43090963_43090966del	c.4163_4166del	p.Q1388Lfs	frameshift deletion	Pathogenic
g.43090964del	c.4165delA	p.S1389Vfs	frameshift deletion	Pathogenic
g.43090965_43090968del	c.4161_4164del	p.Q1388Vfs	frameshift deletion	Pathogenic
g.43090966dup	c.4163dupA	p.S1389Efs	frameshift insertion	Pathogenic
g.43090966_43090967del	c.4162_4163del	p.Q1388Efs	frameshift deletion	Pathogenic
g.43090968_43090969AG	c.4162_4163insTC	p.Q1388Lfs	frameshift insertion	Pathogenic
g.43090968_43090969AG	c.4161_4162del	p.Q1388Efs	frameshift deletion	Pathogenic
g.43090969_43090973del	c.4158_4162del	p.S1387Efs	frameshift deletion	Pathogenic
g.43090967G>A	c.C4162T	p.Q1388X	stopgain	Pathogenic
g.43090974_43090983dup	c.4155_4156insCTCAGGGCTA	p.S1386Lfs	frameshift insertion	Pathogenic
g.43090976_43090977del	c.4152_4153del	p.L1385Ifs	frameshift deletion	Pathogenic
g.43090981G>C	c.C4148G	p.S1383X	stopgain	Pathogenic
g.43090983G>T	c.C4146A	p.C1382X	stopgain	Pathogenic
g.43090989_43090990del	c.4139_4140del	p.E1380Gfs	frameshift deletion	Pathogenic
g.43090991_43090992del	c.4137_4138del	p.E1380Rfs	frameshift deletion	Pathogenic
g.43090992del	c.4137delT	p.E1380Kfs	frameshift deletion	Pathogenic
g.43090993_43090994GA	c.4136_4137del	p.S1379fs	stopgain	Pathogenic
g.43090996_43091053del	c.4097_4134del	p.G1366Vfs	frameshift deletion	Likely_pathogenic
g.43091001del	c.4129delA	p.S1377Afs	frameshift deletion	Pathogenic
g.43091000_43091001del	c.4128_4129del	p.S1377Rfs	frameshift deletion	Pathogenic
g.43091002_43091005del	c.4126_4129del	p.T1376Afs	frameshift deletion	Pathogenic
g.43091002del	c.4127delC	p.T1376Kfs	frameshift deletion	Pathogenic
g.43091007_43091008del	c.4122_4123del	p.S1374Rfs	frameshift deletion	Pathogenic
g.43091006C>A	c.G4123T	p.E1375X	stopgain	Pathogenic
g.43091009_43091010TC	c.4120_4121del	p.S1374fs	frameshift deletion	Pathogenic
g.43091011_43091012insAA	c.4117_4118insTT	p.E1373Vfs	frameshift insertion	Pathogenic
g.43091013_43091014AC	c.4116_4117del	p.C1372fs	stopgain	Pathogenic
g.43091012C>A	c.G4117T	p.E1373X	stopgain	Pathogenic
g.43091013_43091014insAA	c.4116_4117insTT	p.E1373Lfs	frameshift insertion	Pathogenic
g.43091013del	c.4116delT	p.C1372Wfs	frameshift deletion	Pathogenic
g.43091013A>T	c.T4116A	p.C1372X	stopgain	Pathogenic
g.43091018del	c.4113delG	p.C1372Vfs	frameshift deletion	Pathogenic
g.43091016_43091017insAGAT	c.4112_4113insATCT	p.C1372Sfs	frameshift insertion	Pathogenic
g.43091017_43091018insAGAT	c.4111_4112insATCT	p.G1371Dfs	frameshift insertion	Pathogenic
g.43091018_43091019del	c.4110_4111del	p.G1371Vfs	frameshift deletion	Pathogenic
g.43091019_43091022dup	c.4110_4111insATCT	p.G1371Ifs	frameshift insertion	Pathogenic
g.43091021_43091022insGATA	c.4108_4109insATCT	p.S1370Yfs	frameshift insertion	Pathogenic
g.43091021_43091022insAGAT	c.4107_4108insATCT	p.S1370Ifs	frameshift insertion	Pathogenic
g.43091030C>A	c.G4099T	p.E1367X	stopgain	Pathogenic
g.43091033C>T	c.4097-1G>A		splice site	Pathogenic
g.43091034T>C	c.4097-2A>G		splice site	Pathogenic
g.43091034T>G	c.4097-2A>C		splice site	Pathogenic
g.43091425_43091540delinsAT	c.3991_4096AT	p.Q1331Mfs	frameshift substitution	Likely_pathogenic
g.43091438del	c.4094delT	p.L1365fs	stopgain	Pathogenic
g.43091437A>C	c.T4094G	p.L1365X	stopgain	Pathogenic
g.43091438_43091439del	c.4092_4093del	p.L1365Rfs	frameshift deletion	Pathogenic
g.43091438A>C	c.T4093G	p.L1365V	nonsynonymous SNV	Likely_pathogenic
g.43091442_43091458del	c.4074_4090del	p.Q1359Lfs	frameshift deletion	Pathogenic
g.43091443G>C	c.C4088G	p.S1363X	stopgain	Pathogenic
g.43091443G>T	c.C4088A	p.S1363X	stopgain	Pathogenic
g.43091446dup	c.4085dupA	p.D1362Efs	frameshift insertion	Likely_pathogenic
g.43091446del	c.4085delA	p.D1362Vfs	frameshift deletion	Pathogenic
g.43091452del	c.4079delG	p.S1360Tfs	frameshift deletion	Pathogenic
g.43091456G>A	c.C4075T	p.Q1359X	stopgain	Pathogenic
g.43091457dup	c.4074dupG	p.Q1359Afs	frameshift insertion	Pathogenic
g.43091459C>A	c.G4072T	p.E1358X	stopgain	Pathogenic
g.43091461del	c.4071delA	p.E1358Sfs	frameshift deletion	Pathogenic
g.43091462_43091463insAATC	c.4070_4071insTTGA	p.E1357Dfs	stopgain	Pathogenic
g.43091461_43091462insTCAA	c.4069_4070insTTGA	p.E1357Vfs	frameshift insertion	Pathogenic
g.43091462_43091465del	c.4066_4069del	p.Q1356Kfs	frameshift deletion	Pathogenic
g.43091462C>A	c.G4069T	p.E1357X	stopgain	Pathogenic
g.43091462_43091463delinsA	c.4068_4069T	p.Q1356Hfs	frameshift substitution	Pathogenic
g.43091465_43091468del	c.4065_4068del	p.N1355Kfs	frameshift deletion	Pathogenic
g.43091465_43091471del	c.4062_4068del	p.N1354Kfs	frameshift deletion	Pathogenic
g.43091465del	c.4066delC	p.Q1356Kfs	frameshift deletion	Pathogenic
g.43091465_43091469del	c.4062_4066del	p.N1354Kfs	frameshift deletion	Pathogenic
g.43091465G>A	c.C4066T	p.Q1356X	stopgain	Pathogenic
g.43091465_43091467delinsA	c.4064_4066T	p.N1355Ifs	frameshift substitution	Pathogenic
g.43091466_43091469del	c.4062_4065del	p.N1355Kfs	frameshift deletion	Pathogenic
g.43091468dup	c.4064dupA	p.N1355Kfs	frameshift insertion	Pathogenic
g.43091469_43091472del	c.4061_4064del	p.N1354Ifs	frameshift deletion	Pathogenic
g.43091472_43091476del	c.4057_4061del	p.E1353fs	frameshift deletion	Pathogenic
g.43091474C>A	c.G4057T	p.E1353X	stopgain	Pathogenic
g.43091477C>A	c.G4054T	p.E1352X	stopgain	Pathogenic
g.43091480dup	c.4052dupT	p.L1351Ffs	frameshift insertion	Pathogenic
g.43091479_43091480insC	c.4051_4052insG	p.L1351Cfs	frameshift insertion	Pathogenic
g.43091479A>T	c.T4052A	p.L1351X	stopgain	Pathogenic
g.43091480_43091481insC	c.4050_4051insG	p.L1351Vfs	frameshift insertion	Pathogenic
g.43091484dup	c.4049dupG	p.E1352Gfs	frameshift insertion	Pathogenic
g.43091486_43091487insAT	c.4045_4046insTA	p.T1349Ifs	frameshift insertion	Pathogenic
g.43091489del	c.4043delG	p.G1348Efs	frameshift deletion	Pathogenic
g.43091489_43091490CT	c.4041_4042del	p.G1348Nfs	frameshift deletion	Pathogenic
g.43091489C>A	c.G4042T	p.G1348X	stopgain	Pathogenic
g.43091490_43091493TCTT	c.4038_4041del	p.R1347Efs	frameshift deletion	Pathogenic
g.43091494dup	c.4039dupA	p.R1347Kfs	frameshift insertion	Pathogenic
g.43091493_43091494del	c.4038_4039del	p.G1348Nfs	frameshift deletion	Pathogenic
g.43091492T>A	c.A4039T	p.R1347X	stopgain	Pathogenic
g.43091495del	c.4036delG	p.E1346Kfs	frameshift deletion	Pathogenic
g.43091497del	c.4035delA	p.E1346Kfs	frameshift deletion	Pathogenic
g.43091498C>A	c.G4033T	p.E1345X	stopgain	Pathogenic
g.43091509delinsGGTCC	c.4022delinsGGACC	p.V1341Gfs	frameshift substitution	Pathogenic
g.43091512_43091513dup	c.4019_4020insTT	p.L1340Ffs	frameshift insertion	Pathogenic
g.43091514_43091515insAA	c.4016_4017insTT	p.E1339Dfs	frameshift insertion	Pathogenic
g.43091517dup	c.4015dupG	p.E1339Gfs	frameshift insertion	Pathogenic
g.43091516C>A	c.G4015T	p.E1339X	stopgain	Pathogenic
g.43091519del	c.4013delA	p.K1338Rfs	frameshift deletion	Pathogenic
g.43091527_43091536del	c.3999_4008del	p.G1334Tfs	frameshift deletion	Pathogenic
g.43091527_43091530del	c.4002_4005del	p.L1335Vfs	frameshift deletion	Pathogenic
g.43091531del	c.4001delG	p.G1334Vfs	frameshift deletion	Pathogenic
g.43091532_43091538del	c.3995_4001del	p.G1332Vfs	frameshift deletion	Pathogenic
g.43091533del	c.3999delT	p.G1334Vfs	frameshift deletion	Pathogenic
g.43091540_43091543del	c.3990_3993del	p.S1330Rfs	frameshift deletion	Pathogenic
g.43091540G>A	c.C3991T	p.Q1331X	stopgain	Pathogenic
g.43091544_43091546delinsGAAA	c.3985_3987TTTC	p.E1329Ffs	frameshift substitution	Pathogenic
g.43091549dup	c.3982dupT	p.S1328Ffs	frameshift insertion	Pathogenic
g.43091550del	c.3981delG	p.Q1327Hfs	frameshift deletion	Pathogenic
g.43091552G>A	c.C3979T	p.Q1327X	stopgain	Pathogenic
g.43091556_43091583dup	c.3976_3977insTTGATTGGTTCTTCCAAACAAATGAGGC	p.H1326Lfs	frameshift insertion	Pathogenic
g.43091558del	c.3973delA	p.R1325Gfs	frameshift deletion	Pathogenic
g.43091557_43091559delinsTT	c.3972_3974AA	p.M1324Ifs	frameshift substitution	Pathogenic
g.43091559del	c.3972delG	p.M1324Ifs	frameshift deletion	Pathogenic
g.43091560_43092541dup	c.3971_3972insATCTGCTAGAGGAAAACTTTGAGGAACATTCAATGTCACCTGAAAGAGAAATGGGAAATGAGAACATTCCAAGTACAGTGAGCACAATTAGCCGTAATAACATTAGAGAAAATGTTTTTAAAGAAGCCAGCTCAAGCAATATTAATGAAGTAGGTTCCAGTACTAATGAAGTGGGCTCCAGTATTAATGAAATAGGTTCCAGTGATGAAAACATTCAAGCAGAACTAGGTAGAAACAGAGGGCCAAAATTGAATGCTATGCTTAGATTAGGGGTTTTGCAACCTGAGGTCTATAAACAAAGTCTTCCTGGAAGTAATTGTAAGCATCCTGAAATAAAAAAGCAAGAATATGAAGAAGTAGTTCAGACTGTTAATACAGATTTCTC…	p.M1324Ifs	stopgain	Likely_pathogenic
g.43091560_43091563del	c.3968_3971del	p.Q1323Rfs	frameshift deletion	Pathogenic
g.43091562_43091563del	c.3969_3970del	p.Q1323Hfs	frameshift deletion	Pathogenic
g.43091561_43091564TTTG	c.3967_3970del	p.Q1323fs	frameshift deletion	Pathogenic
g.43091564del	c.3967delC	p.Q1323Kfs	frameshift deletion	Pathogenic
g.43091564G>A	c.C3967T	p.Q1323X	stopgain	Pathogenic
g.43091567del	c.3966delA	p.K1322Nfs	frameshift deletion	Pathogenic
g.43091567T>A	c.A3964T	p.K1322X	stopgain	Pathogenic
g.43091571del	c.3961delT	p.S1321Pfs	frameshift deletion	Pathogenic
g.43091572del	c.3959delC	p.S1320Ffs	frameshift deletion	Pathogenic
g.43091574_43091575del	c.3956_3957del	p.G1319Vfs	frameshift deletion	Pathogenic
g.43091579_43091582del	c.3952_3955del	p.I1318Vfs	frameshift deletion	Pathogenic
g.43091578dup	c.3954dupT	p.G1319Wfs	frameshift insertion	Pathogenic
g.43091578del	c.3954delT	p.I1318Mfs	frameshift deletion	Pathogenic
g.43091584_43091587del	c.3947_3950del	p.F1316fs	stopgain	Pathogenic
g.43091594G>A	c.C3937T	p.Q1313X	stopgain	Pathogenic
g.43091600_43091603dup	c.3934_3935insAACA	p.T1312Kfs	frameshift insertion	Pathogenic
g.43091600_43091603del	c.3931_3934del	p.N1311Pfs	frameshift deletion	Pathogenic
g.43091601del	c.3932delA	p.N1311Tfs	frameshift deletion	Pathogenic
g.43091602_43091605del	c.3927_3930del	p.N1309Kfs	frameshift deletion	Pathogenic
g.43091603dup	c.3928dupA	p.T1310Nfs	frameshift insertion	Pathogenic
g.43091607del	c.3926delA	p.N1309Ifs	frameshift deletion	Pathogenic
g.43091615del	c.3917delT	p.L1306fs	stopgain	Pathogenic
g.43091614_43091615del	c.3916_3917del	p.L1306Dfs	frameshift deletion	Pathogenic
g.43091617del	c.3914delA	p.D1305Afs	frameshift deletion	Pathogenic
g.43091622del	c.3910delG	p.E1304Kfs	frameshift deletion	Pathogenic
g.43091621C>A	c.G3910T	p.E1304X	stopgain	Pathogenic
g.43091622_43091623dup	c.3909_3910insTG	p.E1304Wfs	frameshift insertion	Pathogenic
g.43091624dup	c.3908dupT	p.L1303Ffs	frameshift insertion	Pathogenic
g.43091623_43091624delinsTCC	c.3907_3908GGA	p.L1303Gfs	frameshift substitution	Pathogenic
g.43091627C>A	c.G3904T	p.E1302X	stopgain	Pathogenic
g.43091629_43091630del	c.3901_3902del	p.S1301fs	frameshift deletion	Pathogenic
g.43091636G>A	c.C3895T	p.Q1299X	stopgain	Pathogenic
g.43091638G>C	c.C3893G	p.S1298X	stopgain	Pathogenic
g.43091638G>T	c.C3893A	p.S1298X	stopgain	Pathogenic
g.43091645del	c.3889delT	p.S1297Lfs	frameshift deletion	Pathogenic
g.43091646del	c.3885delG	p.L1295Ffs	frameshift deletion	Pathogenic
g.43091651_43091654del	c.3880_3883del	p.S1294Cfs	frameshift deletion	Pathogenic
g.43091649del	c.3882delC	p.L1295Cfs	frameshift deletion	Pathogenic
g.43091654_43091655del	c.3876_3877del	p.A1293fs	frameshift deletion	Pathogenic
g.43091654_43091661del	c.3870_3877del	p.K1290Nfs	frameshift deletion	Pathogenic
g.43091655del	c.3876delT	p.A1293Lfs	frameshift deletion	Pathogenic
g.43091658del	c.3874delT	p.S1292Lfs	frameshift deletion	Pathogenic
g.43091658_43091659insG	c.3872_3873insC	p.S1292Ffs	frameshift insertion	Pathogenic
g.43091659del	c.3872delG	p.C1291Ffs	frameshift deletion	Pathogenic
g.43091659_43091660insG	c.3871_3872insC	p.C1291Sfs	frameshift insertion	Pathogenic
g.43091660_43091664del	c.3867_3871del	p.K1290Ffs	frameshift deletion	Pathogenic
g.43091660_43091661insG	c.3870_3871insC	p.C1291Lfs	frameshift insertion	Pathogenic
g.43091663_43091664del	c.3869_3870del	p.K1290Mfs	frameshift deletion	Pathogenic
g.43091663T>A	c.A3868T	p.K1290X	stopgain	Pathogenic
g.43091668del	c.3865delA	p.T1289Qfs	frameshift deletion	Likely_pathogenic
g.43091670del	c.3862delG	p.E1288Kfs	frameshift deletion	Pathogenic
g.43091669C>A	c.G3862T	p.E1288X	stopgain	Pathogenic
g.43091672_43091675del	c.3858_3861del	p.S1286Rfs	frameshift deletion	Pathogenic
g.43091675del	c.3856delA	p.S1286Vfs	frameshift deletion	Pathogenic
g.43091679del	c.3853delC	p.S1286Vfs	frameshift deletion	Pathogenic
g.43091680_43091681dup	c.3852_3853insAC	p.L1285Tfs	frameshift insertion	Pathogenic
g.43091685_43091695del	c.3840_3850del	p.Q1281Pfs	frameshift deletion	Pathogenic
g.43091688del	c.3844delG	p.E1282Nfs	frameshift deletion	Pathogenic
g.43091688_43091692del	c.3839_3843del	p.S1280fs	stopgain	Pathogenic
g.43091689_43091690del	c.3841_3842del	p.Q1281Gfs	frameshift deletion	Pathogenic
g.43091688_43091692delinsGCCT	c.3839_3843AGGC	p.S1280fs	stopgain	Pathogenic
g.43091690G>A	c.C3841T	p.Q1281X	stopgain	Pathogenic
g.43091691_43091694del	c.3837_3840del	p.S1280Rfs	frameshift deletion	Pathogenic
g.43091697del	c.3835delG	p.A1279Hfs	frameshift deletion	Pathogenic
g.43091700del	c.3833delA	p.K1278Rfs	frameshift deletion	Pathogenic
g.43091701dup	c.3830dupC	p.A1279Gfs	frameshift insertion	Pathogenic
g.43091706dup	c.3825dupA	p.L1276Ifs	frameshift insertion	Pathogenic
g.43091706del	c.3825delA	p.L1276Wfs	frameshift deletion	Pathogenic
g.43091707dup	c.3824dupT	p.L1276Ifs	frameshift insertion	Pathogenic
g.43091709_43091713del	c.3819_3823del	p.Q1273Hfs	frameshift deletion	Pathogenic
g.43091710dup	c.3821dupT	p.I1275Nfs	frameshift insertion	Pathogenic
g.43091712dup	c.3820dupG	p.V1274Gfs	frameshift insertion	Pathogenic
g.43091712del	c.3820delG	p.V1274fs	stopgain	Pathogenic
g.43091714G>A	c.C3817T	p.Q1273X	stopgain	Pathogenic
g.43091715_43091716insA	c.3815_3816insT	p.Q1273Pfs	frameshift insertion	Pathogenic
g.43091716_43091717insA	c.3814_3815insT	p.N1272Ifs	frameshift insertion	Pathogenic
g.43091718dup	c.3813dupT	p.N1272fs	stopgain	Pathogenic
g.43091721G>T	c.C3810A	p.C1270X	stopgain	Pathogenic
g.43091731A>C	c.T3800G	p.L1267X	stopgain	Pathogenic
g.43091738del	c.3794delA	p.N1265Ifs	frameshift deletion	Pathogenic
g.43091741del	c.3791delA	p.K1264Rfs	frameshift deletion	Pathogenic/Likely_pathogenic
g.43091746G>T	c.C3785A	p.S1262X	stopgain	Pathogenic
g.43091750del	c.3782delT	p.L1261Yfs	frameshift deletion	Pathogenic
g.43091749A>C	c.T3782G	p.L1261X	stopgain	Pathogenic
g.43091749A>T	c.T3782A	p.L1261X	stopgain	Pathogenic
g.43091751dup	c.3780dupA	p.L1261Ifs	frameshift insertion	Pathogenic
g.43091754del	c.3779delT	p.L1260Yfs	frameshift deletion	Pathogenic
g.43091752_43091753insT	c.3778_3779insA	p.L1260Yfs	frameshift insertion	Pathogenic
g.43091752A>C	c.T3779G	p.L1260X	stopgain	Pathogenic
g.43091753_43091760del	c.3771_3778del	p.E1257Dfs	frameshift deletion	Pathogenic
g.43091754_43091761del	c.3770_3777del	p.E1257Vfs	frameshift deletion	Pathogenic
g.43091755_43091759del	c.3772_3776del	p.E1258Ffs	frameshift deletion	Pathogenic
g.43091756_43091757TC	c.3774_3775del	p.N1259Ffs	frameshift deletion	Pathogenic
g.43091759_43091760del	c.3771_3772del	p.N1259Ffs	frameshift deletion	Pathogenic
g.43091759C>A	c.G3772T	p.E1258X	stopgain	Pathogenic
g.43091759_43091760delinsG	c.3771_3772C	p.E1257Dfs	frameshift substitution	Pathogenic
g.43091760_43091761CT	c.3770_3771del	p.E1257Gfs	frameshift deletion	Pathogenic
g.43091764_43091782del	c.3751_3769del	p.C1251Rfs	frameshift deletion	Pathogenic
g.43091764_43091765GT	c.3767_3768del	p.T1256Rfs	frameshift deletion	Pathogenic
g.43091765dup	c.3766dupA	p.T1256Nfs	frameshift insertion	Pathogenic
g.43091766del	c.3765delC	p.N1255Kfs	frameshift deletion	Pathogenic
g.43091768dup	c.3764dupA	p.N1255Kfs	frameshift insertion	Pathogenic
g.43091767_43091768del	c.3763_3764del	p.N1255Hfs	frameshift deletion	Pathogenic
g.43091769_43091770del	c.3762_3763del	p.N1255Hfs	frameshift deletion	Pathogenic
g.43091768_43091769insAA	c.3762_3763insTT	p.N1255Lfs	frameshift insertion	Pathogenic
g.43091769_43091770insA	c.3761_3762insT	p.K1254Nfs	frameshift insertion	Pathogenic
g.43091769_43091770insAA	c.3761_3762insTT	p.K1254Nfs	stopgain	Pathogenic
g.43091770_43091771insA	c.3760_3761insT	p.K1254Ifs	frameshift insertion	Pathogenic
g.43091771_43091772del	c.3759_3760del	p.K1254Efs	frameshift deletion	Pathogenic
g.43091771_43091775del	c.3756_3760del	p.S1253Efs	frameshift deletion	Pathogenic
g.43091772dup	c.3759dupT	p.K1254fs	stopgain	Pathogenic
g.43091772del	c.3759delT	p.K1254Rfs	frameshift deletion	Pathogenic
g.43091773_43091774del	c.3758_3759del	p.S1253fs	stopgain	Pathogenic
g.43091773_43091776GACA	c.3756_3759del	p.S1253Rfs	frameshift deletion	Pathogenic
g.43091775_43091776del	c.3756_3757del	p.S1253fs	frameshift deletion	Pathogenic
g.43091777_43091778del	c.3754_3755del	p.L1252Vfs	frameshift deletion	Pathogenic
g.43091778A>T	c.T3753A	p.C1251X	stopgain	Pathogenic
g.43091780_43091783del	c.3749_3752del	p.E1250Vfs	frameshift deletion	Pathogenic
g.43091781del	c.3750delG	p.E1250Dfs	frameshift deletion	Pathogenic
g.43091782_43091783insG	c.3748_3749insC	p.E1250Afs	frameshift insertion	Pathogenic
g.43091783C>A	c.G3748T	p.E1250X	stopgain	Pathogenic
g.43091785dup	c.3747dupC	p.E1250Rfs	frameshift insertion	Pathogenic
g.43091784_43091826dup	c.3747_3748insCAATATACCTTCTCAGTCTACTAGGCATAGCACCGTTGCTACC	p.E1250Qfs	stopgain	Pathogenic
g.43091788_43091821del	c.3714_3747del	p.Q1240Vfs	frameshift deletion	Pathogenic
g.43091790_43091802del	c.3731_3743del	p.H1244Lfs	frameshift deletion	Pathogenic
g.43091793_43091811del	c.3722_3740del	p.S1241Lfs	frameshift deletion	Pathogenic
g.43091794_43091801del	c.3731_3738del	p.H1244Rfs	frameshift deletion	Pathogenic
g.43091795del	c.3736delA	p.T1246Pfs	frameshift deletion	Pathogenic
g.43091797del	c.3734delG	p.S1245Tfs	frameshift deletion	Pathogenic
g.43091800_43091801insCCTAGTAGACTGAGAAGGTATATTGTTTACTTTACCAAATAACAAGTGTC	c.3730_3731insGACACTTGTTATTTGGTAAAGTAAACAATATACCTTCTCAGTCTACTAGG	p.H1244Rfs	frameshift insertion	Pathogenic
g.43091850_43091851insCCCTAGTAGACTGAGAAGGTATATTGTTTACTTTACCAAATAACAAGTGT	c.3729_3730insGACACTTGTTATTTGGTAAAGTAAACAATATACCTTCTCAGTCTACTAGG	p.H1244Dfs	stopgain	Pathogenic
g.43091805dup	c.3726dupT	p.R1243fs	stopgain	Pathogenic
g.43091813G>A	c.C3718T	p.Q1240X	stopgain	Pathogenic
g.43091815dup	c.3716dupC	p.Q1240Sfs	frameshift insertion	Pathogenic
g.43091814_43091816delinsG	c.3715_3717C	p.S1239Pfs	frameshift substitution	Pathogenic
g.43091817del	c.3715delT	p.S1239Lfs	frameshift deletion	Pathogenic
g.43091817_43091821del	c.3711_3715del	p.P1238Sfs	frameshift deletion	Pathogenic
g.43091819_43091826del	c.3706_3713del	p.N1236Ffs	frameshift deletion	Pathogenic
g.43091819_43091820del	c.3711_3712del	p.P1238Ffs	frameshift deletion	Pathogenic
g.43091821_43091822AT	c.3711_3712insTA	p.P1238Yfs	frameshift insertion	Pathogenic
g.43091821del	c.3710delT	p.I1237Nfs	frameshift deletion	Pathogenic
g.43091824_43091825del	c.3706_3707del	p.N1236Yfs	frameshift deletion	Pathogenic
g.43091826_43091829del	c.3704_3707del	p.N1235Ifs	frameshift deletion	Pathogenic
g.43091829del	c.3704delA	p.N1235Tfs	frameshift deletion	Pathogenic
g.43091827_43091831TTTAC	c.3700_3704del	p.V1234Qfs	frameshift deletion	Pathogenic
g.43091834del	c.3699delA	p.V1234fs	frameshift deletion	Pathogenic
g.43091833_43091836del	c.3695_3698del	p.G1232Efs	frameshift deletion	Pathogenic
g.43091834T>A	c.A3697T	p.K1233X	stopgain	Pathogenic
g.43091837del	c.3695delG	p.G1232Vfs	frameshift deletion	Pathogenic
g.43091840dup	c.3693dupT	p.G1232Wfs	frameshift insertion	Pathogenic
g.43091841dup	c.3690dupA	p.F1231Ifs	frameshift insertion	Likely_pathogenic
g.43091842A>C	c.T3689G	p.L1230X	stopgain	Pathogenic
g.43091845A>T	c.T3686A	p.L1229X	stopgain	Pathogenic
g.43091848del	c.3683delA	p.H1228Pfs	frameshift deletion	Pathogenic
g.43091853_43091856del	c.3676_3679del	p.F1226Nfs	frameshift deletion	Pathogenic
g.43091852G>A	c.C3679T	p.Q1227X	stopgain	Pathogenic
g.43091856G>T	c.C3675A	p.C1225X	stopgain	Pathogenic
g.43091861del	c.3672delC	p.C1225Afs	frameshift deletion	Pathogenic
g.43091861_43091864dup	c.3671_3672insTTCC	p.C1225Sfs	frameshift insertion	Pathogenic
g.43091863del	c.3669delT	p.C1225Afs	frameshift deletion	Pathogenic
g.43091865_43091866CT	c.3665_3666del	p.E1222Afs	frameshift deletion	Pathogenic
g.43091866del	c.3665delA	p.E1222Gfs	frameshift deletion	Pathogenic
g.43091867C>A	c.G3664T	p.E1222X	stopgain	Pathogenic
g.43091870C>A	c.G3661T	p.E1221X	stopgain	Pathogenic
g.43091874del	c.3658delG	p.D1220Mfs	frameshift deletion	Pathogenic
g.43091879_43091883del	c.3648_3652del	p.S1217fs	frameshift deletion	Pathogenic
g.43091880dup	c.3651dupT	p.S1218fs	stopgain	Pathogenic
g.43091880_43091881insT	c.3650_3651insA	p.S1218fs	frameshift insertion	Pathogenic
g.43091882dup	c.3649dupT	p.S1217Ffs	frameshift insertion	Pathogenic
g.43091881_43091882insT	c.3649_3650insA	p.S1217fs	frameshift insertion	Pathogenic
g.43091883dup	c.3648dupA	p.S1217Ifs	frameshift insertion	Pathogenic
g.43091884_43091888del	c.3644_3648del	p.N1215Ifs	frameshift deletion	Pathogenic
g.43091884A>C	c.T3647G	p.L1216X	stopgain	Pathogenic
g.43091884A>T	c.T3647A	p.L1216X	stopgain	Pathogenic
g.43091891_43091895del	c.3640_3644del	p.E1214Lfs	frameshift deletion	Pathogenic
g.43091889_43091890CT	c.3643_3644insGA	p.N1215Rfs	frameshift insertion	Pathogenic
g.43091889_43091890CT	c.3642_3643del	p.N1215Lfs	frameshift deletion	Pathogenic
g.43091890del	c.3641delA	p.E1214Gfs	frameshift deletion	Pathogenic
g.43091891C>A	c.G3640T	p.E1214X	stopgain	Pathogenic
g.43091894del	c.3637delG	p.E1213Kfs	frameshift deletion	Pathogenic
g.43091894C>A	c.G3637T	p.E1213X	stopgain	Pathogenic
g.43091896G>C	c.C3635G	p.S1212X	stopgain	Pathogenic
g.43091897_43091900del	c.3631_3634del	p.S1211Qfs	frameshift deletion	Pathogenic
g.43091901_43091902CT	c.3629_3630del	p.E1210Vfs	frameshift deletion	Pathogenic
g.43091902dup	c.3629dupA	p.S1211Vfs	frameshift insertion	Pathogenic
g.43091903del	c.3628delG	p.E1210Sfs	frameshift deletion	Pathogenic
g.43091904dup	c.3627dupA	p.E1210Rfs	frameshift insertion	Pathogenic
g.43091906dup	c.3626dupT	p.L1209Ffs	frameshift insertion	Pathogenic
g.43091906del	c.3626delT	p.L1209fs	stopgain	Pathogenic
g.43091905_43091906insT	c.3625_3626insA	p.L1209Yfs	frameshift insertion	Pathogenic
g.43091905A>C	c.T3626G	p.L1209X	stopgain	Pathogenic
g.43091905_43091910delinsTT	c.3621_3626AA	p.L1209Sfs	frameshift substitution	Pathogenic
g.43091909dup	c.3624dupA	p.L1209Ifs	frameshift insertion	Pathogenic
g.43091909del	c.3624delA	p.K1208Nfs	frameshift deletion	Pathogenic
g.43091910del	c.3621delG	p.K1208Nfs	frameshift deletion	Pathogenic
g.43091912dup	c.3620dupA	p.K1208Efs	frameshift insertion	Pathogenic
g.43091912T>A	c.A3619T	p.K1207X	stopgain	Pathogenic
g.43091918del	c.3616delG	p.A1206Pfs	frameshift deletion	Pathogenic
g.43091919del	c.3612delA	p.A1206Pfs	frameshift deletion	Pathogenic
g.43091924G>A	c.C3607T	p.R1203X	stopgain	Pathogenic
g.43091926dup	c.3605dupA	p.Y1202fs	stopgain	Pathogenic
g.43091928del	c.3604delT	p.Y1202Tfs	frameshift deletion	Pathogenic
g.43091931_43091937del	c.3596_3602del	p.A1199Vfs	frameshift deletion	Pathogenic
g.43091931_43091932del	c.3599_3600del	p.Q1200Rfs	frameshift deletion	Pathogenic
g.43091933G>A	c.C3598T	p.Q1200X	stopgain	Pathogenic
g.43091939_43091940dup	c.3593_3594insTT	p.L1198Ffs	frameshift insertion	Pathogenic
g.43091940del	c.3593delT	p.L1198Wfs	frameshift deletion	Pathogenic
g.43091938A>T	c.T3593A	p.L1198X	stopgain	Pathogenic
g.43091941del	c.3590delA	p.H1197Lfs	frameshift deletion	Pathogenic
g.43091941_43091948del	c.3583_3590del	p.H1195Ffs	frameshift deletion	Pathogenic
g.43091945_43091952del	c.3582_3589del	p.H1195Ffs	frameshift deletion	Pathogenic
g.43091944dup	c.3587dupC	p.H1197Tfs	frameshift insertion	Pathogenic
g.43091945dup	c.3586dupA	p.T1196Nfs	frameshift insertion	Pathogenic
g.43091950del	c.3583delC	p.H1195Ifs	frameshift deletion	Pathogenic
g.43091950_43091951insA	c.3580_3581insT	p.T1194Ifs	frameshift insertion	Pathogenic
g.43091951del	c.3580delA	p.T1194Pfs	frameshift deletion	Pathogenic
g.43091951_43091952insA	c.3579_3580insT	p.T1194Yfs	frameshift insertion	Pathogenic
g.43091955dup	c.3578dupT	p.T1194Hfs	frameshift insertion	Pathogenic
g.43091954_43091955insTT	c.3576_3577insAA	p.F1193Nfs	frameshift insertion	Pathogenic
g.43091960del	c.3571delA	p.S1191Afs	frameshift deletion	Pathogenic
g.43091961del	c.3570delT	p.S1191Afs	frameshift deletion	Pathogenic
g.43091961_43091962del	c.3569_3570del	p.P1190Qfs	frameshift deletion	Pathogenic
g.43091963del	c.3569delC	p.P1190Lfs	frameshift deletion	Pathogenic
g.43091968dup	c.3564dupG	p.S1189Efs	frameshift insertion	Pathogenic
g.43091978C>A	c.G3553T	p.E1185X	stopgain	Pathogenic
g.43091981_43091982del	c.3549_3550del	p.G1184Rfs	frameshift deletion	Pathogenic
g.43091981_43091982delinsA	c.3549_3550T	p.K1183Nfs	frameshift substitution	Pathogenic
g.43091983_43091984del	c.3548_3549del	p.K1183Rfs	frameshift deletion	Pathogenic
g.43091981_43091984delinsATC	c.3547_3550GAT	p.K1183Dfs	frameshift substitution	Pathogenic
g.43091987G>A	c.C3544T	p.Q1182X	stopgain	Pathogenic
g.43091987_43091988insTC	c.3543_3544insGA	p.Q1182Dfs	frameshift insertion	Pathogenic
g.43091989_43091990del	c.3541_3542del	p.V1181Pfs	frameshift deletion	Pathogenic
g.43091990del	c.3541delG	p.V1181Sfs	frameshift deletion	Pathogenic
g.43091991_43091992del	c.3540_3541del	p.V1181Pfs	frameshift deletion	Pathogenic
g.43091996T>A	c.A3535T	p.K1179X	stopgain	Pathogenic
g.43091997del	c.3534delC	p.S1178Rfs	frameshift deletion	Pathogenic
g.43091998_43092000delinsTT	c.3531_3533AA	p.F1177Lfs	frameshift substitution	Pathogenic
g.43092004dup	c.3531dupT	p.S1178fs	stopgain	Pathogenic
g.43092004del	c.3531delT	p.F1177Lfs	frameshift deletion	Pathogenic
g.43092005del	c.3526delG	p.V1176Ffs	frameshift deletion	Pathogenic
g.43092017C>A	c.G3514T	p.E1172X	stopgain	Pathogenic
g.43092020del	c.3512delA	p.K1171Rfs	frameshift deletion	Pathogenic
g.43092020T>A	c.A3511T	p.K1171X	stopgain	Pathogenic
g.43092024_43092028del	c.3505_3509del	p.D1169fs	frameshift deletion	Pathogenic
g.43092025dup	c.3506dupA	p.D1169Efs	frameshift insertion	Pathogenic
g.43092026_43092027insT	c.3504_3505insA	p.D1169Rfs	frameshift insertion	Pathogenic
g.43092031dup	c.3503dupA	p.N1168Kfs	frameshift insertion	Pathogenic
g.43092031del	c.3503delA	p.N1168Mfs	frameshift deletion	Pathogenic
g.43092032_43092042del	c.3489_3499del	p.S1164Kfs	frameshift deletion	Pathogenic
g.43092033del	c.3498delT	p.E1167Kfs	frameshift deletion	Pathogenic
g.43092035del	c.3496delG	p.A1166Lfs	frameshift deletion	Pathogenic
g.43092038_43092039del	c.3494_3495del	p.F1165Cfs	frameshift deletion	Pathogenic
g.43092038_43092050del	c.3481_3493del	p.E1161Lfs	frameshift deletion	Pathogenic
g.43092039_43092049del	c.3482_3492del	p.E1161Vfs	frameshift deletion	Pathogenic
g.43092042_43092048del	c.3485_3491del	p.D1162Vfs	frameshift deletion	Pathogenic
g.43092042_43092052del	c.3481_3491del	p.E1161Ffs	frameshift deletion	Pathogenic
g.43092043_43092046del	c.3485_3488del	p.D1162Vfs	frameshift deletion	Pathogenic
g.43092043_43092052del	c.3479_3488del	p.K1160Ifs	frameshift deletion	Pathogenic
g.43092047_43092056del	c.3478_3487del	p.K1160Lfs	frameshift deletion	Pathogenic
g.43092046del	c.3485delA	p.D1162Vfs	frameshift deletion	Pathogenic
g.43092050_43092054del	c.3479_3483del	p.K1160Rfs	frameshift deletion	Pathogenic
g.43092051del	c.3481delG	p.E1161Kfs	frameshift deletion	Pathogenic
g.43092050C>A	c.G3481T	p.E1161X	stopgain	Pathogenic
g.43092051_43092054del	c.3477_3480del	p.I1159Mfs	frameshift deletion	Pathogenic
g.43092054dup	c.3479dupA	p.E1161Gfs	frameshift insertion	Pathogenic
g.43092054del	c.3479delA	p.K1160Rfs	frameshift deletion	Pathogenic
g.43092053_43092054del	c.3478_3479del	p.K1160Gfs	frameshift deletion	Pathogenic
g.43092052_43092054delinsG	c.3477_3479C	p.K1160Gfs	frameshift substitution	Pathogenic
g.43092058dup	c.3475dupA	p.I1159Nfs	frameshift insertion	Pathogenic/Likely_pathogenic
g.43092058del	c.3475delA	p.I1159fs	stopgain	Pathogenic
g.43092059C>A	c.G3472T	p.E1158X	stopgain	Pathogenic
g.43092063del	c.3468delT	p.D1156Efs	frameshift deletion	Pathogenic
g.43092069dup	c.3462dupA	p.D1155Rfs	frameshift insertion	Pathogenic
g.43092069_43092073del	c.3458_3462del	p.L1153Rfs	frameshift deletion	Pathogenic
g.43092070A>C	c.T3461G	p.L1154X	stopgain	Pathogenic
g.43092072_43092073del	c.3459_3460del	p.L1154Rfs	frameshift deletion	Pathogenic
g.43092073del	c.3458delT	p.L1153Rfs	frameshift deletion	Pathogenic
g.43092076del	c.3455delA	p.D1152Afs	frameshift deletion	Pathogenic
g.43092081dup	c.3450dupT	p.D1151fs	stopgain	Pathogenic
g.43092081del	c.3450delT	p.D1151Mfs	frameshift deletion	Pathogenic
g.43092083GT	c.3447_3448del	p.P1150fs	frameshift deletion	Pathogenic
g.43092089del	c.3442delG	p.E1148Rfs	frameshift deletion	Pathogenic
g.43092089C>A	c.G3442T	p.E1148X	stopgain	Pathogenic
g.43092091_43092092del	c.3440_3441del	p.S1147fs	stopgain	Pathogenic
g.43092095_43092098del	c.3436_3439del	p.C1146Lfs	frameshift deletion	Pathogenic
g.43092099del	c.3433delG	p.V1145Ffs	frameshift deletion	Pathogenic
g.43092101G>A	c.C3430T	p.Q1144X	stopgain	Pathogenic
g.43092103delinsTA	c.3428delinsTA	p.S1143Lfs	frameshift substitution	Pathogenic
g.43092104_43092115delinsG	c.3416_3427C	p.S1139Tfs	frameshift substitution	Pathogenic
g.43092107del	c.3424delG	p.A1142Hfs	frameshift deletion	Pathogenic
g.43092111dup	c.3420dupT	p.H1141Sfs	frameshift insertion	Pathogenic
g.43092114del	c.3417delT	p.S1139Rfs	frameshift deletion	Pathogenic
g.43092115dup	c.3416dupG	p.S1139Rfs	frameshift insertion	Pathogenic
g.43092115del	c.3416delG	p.S1139Ifs	frameshift deletion	Pathogenic
g.43092116_43092117insC	c.3414_3415insG	p.S1139Efs	frameshift insertion	Pathogenic
g.43092120dup	c.3413dupG	p.S1139Kfs	frameshift insertion	Pathogenic
g.43092120del	c.3413delG	p.G1138Efs	frameshift deletion	Pathogenic
g.43092119C>A	c.G3412T	p.G1138X	stopgain	Pathogenic
g.43092128_43092132del	c.3401_3405del	p.E1134Afs	frameshift deletion	Pathogenic
g.43092128G>A	c.C3403T	p.Q1135X	stopgain	Pathogenic
g.43092131C>A	c.G3400T	p.E1134X	stopgain	Pathogenic
g.43092133_43092134del	c.3397_3398del	p.L1133Rfs	frameshift deletion	Pathogenic
g.43092133A>C	c.T3398G	p.L1133X	stopgain	Pathogenic
g.43092133A>T	c.T3398A	p.L1133X	stopgain	Pathogenic
g.43092135del	c.3396delC	p.L1133fs	frameshift deletion	Pathogenic
g.43092137del	c.3395delA	p.N1132Tfs	frameshift deletion	Pathogenic
g.43092140_43092147del	c.3384_3391del	p.I1129fs	frameshift deletion	Pathogenic
g.43092141del	c.3390delA	p.D1131Ifs	frameshift deletion	Pathogenic
g.43092142G>C	c.C3389G	p.S1130X	stopgain	Pathogenic
g.43092145del	c.3388delT	p.S1130Qfs	frameshift deletion	Pathogenic
g.43092150A>C	c.T3381G	p.Y1127X	stopgain	Pathogenic
g.43092155del	c.3377delC	p.P1126Hfs	frameshift deletion	Pathogenic
g.43092155_43092156GA	c.3375_3376del	p.P1126Ifs	frameshift deletion	Pathogenic
g.43092158dup	c.3373dupT	p.S1125Ffs	frameshift insertion	Pathogenic
g.43092163_43092173del	c.3358_3368del	p.V1120Ffs	frameshift deletion	Pathogenic
g.43092166_43092167del	c.3365_3366del	p.T1122Rfs	frameshift deletion	Pathogenic
g.43092168_43092172del	c.3359_3363del	p.V1120Dfs	frameshift deletion	Pathogenic
g.43092170del	c.3362delA	p.N1121Ifs	frameshift deletion	Pathogenic
g.43092172dup	c.3360dupT	p.N1121fs	stopgain	Pathogenic
g.43092171_43092172del	c.3359_3360del	p.V1120Efs	frameshift deletion	Pathogenic
g.43092173_43092174del	c.3358_3359del	p.V1120fs	frameshift deletion	Pathogenic
g.43092174del	c.3357delT	p.V1120Lfs	frameshift deletion	Pathogenic
g.43092177_43092178del	c.3354_3355del	p.Q1118Hfs	frameshift deletion	Pathogenic
g.43092179G>A	c.C3352T	p.Q1118X	stopgain	Pathogenic
g.43092181dup	c.3351dupT	p.Q1118Sfs	frameshift insertion	Pathogenic
g.43092187_43092190del	c.3342_3345del	p.E1115fs	frameshift deletion	Pathogenic
g.43092188del	c.3343delG	p.E1115Kfs	frameshift deletion	Pathogenic
g.43092191_43092193del	c.3339_3341del	p.Y1113_Y1863del	stopgain	Pathogenic
g.43092191C>A	c.G3340T	p.E1114X	stopgain	Pathogenic
g.43092192A>C	c.T3339G	p.Y1113X	stopgain	Pathogenic
g.43092194dup	c.3337dupT	p.Y1113Lfs	frameshift insertion	Likely_pathogenic
g.43092196_43092199del	c.3333_3336del	p.Q1111Hfs	frameshift deletion	Pathogenic
g.43092196_43092200del	c.3331_3335del	p.Q1111Ifs	frameshift deletion	Pathogenic
g.43092197del	c.3334delG	p.E1112Nfs	frameshift deletion	Pathogenic
g.43092200_43092203del	c.3331_3334del	p.Q1111Nfs	frameshift deletion	Pathogenic
g.43092199dup	c.3333dupA	p.E1112Rfs	frameshift insertion	Pathogenic
g.43092199del	c.3333delA	p.E1112Nfs	frameshift deletion	Pathogenic
g.43092200del	c.3331delC	p.Q1111Kfs	frameshift deletion	Pathogenic
g.43092200G>A	c.C3331T	p.Q1111X	stopgain	Pathogenic
g.43092200_43092201insT	c.3330_3331insA	p.Q1111Tfs	frameshift insertion	Pathogenic
g.43092201del	c.3330delG	p.K1110Nfs	frameshift deletion	Pathogenic
g.43092201_43092202del	c.3329_3330del	p.K1110Tfs	frameshift deletion	Pathogenic
g.43092207dup	c.3329dupA	p.Q1111Afs	frameshift insertion	Pathogenic
g.43092207del	c.3329delA	p.K1110Sfs	frameshift deletion	Pathogenic
g.43092204_43092207del	c.3326_3329del	p.K1109Sfs	frameshift deletion	Pathogenic
g.43092203_43092207del	c.3325_3329del	p.K1109Afs	frameshift deletion	Pathogenic
g.43092208_43092211del	c.3323_3326del	p.I1108Kfs	frameshift deletion	Pathogenic
g.43092208_43092209del	c.3323_3324del	p.I1108Kfs	frameshift deletion	Pathogenic
g.43092212C>A	c.G3319T	p.E1107X	stopgain	Pathogenic
g.43092215del	c.3317delC	p.P1106Lfs	frameshift deletion	Pathogenic
g.43092217del	c.3314delA	p.H1105Lfs	frameshift deletion	Pathogenic
g.43092221_43092222insG	c.3309_3310insC	p.K1104Qfs	frameshift insertion	Pathogenic
g.43092222_43092223insG	c.3308_3309insC	p.K1104fs	frameshift insertion	Pathogenic
g.43092222A>T	c.T3309A	p.C1103X	stopgain	Pathogenic
g.43092223_43092224insG	c.3307_3308insC	p.C1103Sfs	frameshift insertion	Pathogenic
g.43092225_43092228del	c.3304_3307del	p.N1102Vfs	frameshift deletion	Pathogenic
g.43092228_43092231del	c.3302_3305del	p.S1101Ifs	frameshift deletion	Pathogenic
g.43092236del	c.3296delC	p.P1099Lfs	frameshift deletion	Pathogenic
g.43092238del	c.3294delT	p.P1099Lfs	frameshift deletion	Pathogenic
g.43092239_43092240del	c.3292_3293del	p.L1098Sfs	frameshift deletion	Pathogenic
g.43092244dup	c.3289dupA	p.S1097Kfs	frameshift insertion	Pathogenic
g.43092244del	c.3289delA	p.S1097Vfs	frameshift deletion	Pathogenic
g.43092243_43092244del	c.3288_3289del	p.L1098Sfs	frameshift deletion	Pathogenic
g.43092245_43092290dup	c.3288_3289insTGCTATGCTTAGATTAGGGGTTTTGCAACCTGAGGTCTATAAACAA	p.S1097Cfs	stopgain	Pathogenic
g.43092245del	c.3286delC	p.Q1096Kfs	frameshift deletion	Pathogenic
g.43092245G>A	c.C3286T	p.Q1096X	stopgain	Pathogenic
g.43092248del	c.3285delA	p.K1095Nfs	frameshift deletion	Pathogenic
g.43092249A>C	c.T3282G	p.Y1094X	stopgain	Pathogenic
g.43092252_43092253del	c.3279_3280del	p.Y1094fs	frameshift deletion	Pathogenic
g.43092252del	c.3279delC	p.Y1094Ifs	frameshift deletion	Pathogenic
g.43092256_43092271del	c.3262_3277del	p.V1088Sfs	frameshift deletion	Pathogenic
g.43092263G>A	c.C3268T	p.Q1090X	stopgain	Pathogenic
g.43092268del	c.3266delT	p.L1089Cfs	frameshift deletion	Pathogenic
g.43092265A>T	c.T3266A	p.L1089X	stopgain	Pathogenic
g.43092272del	c.3262delG	p.V1088Ffs	frameshift deletion	Pathogenic
g.43092270_43092271insTAG	c.3260_3261insCTA	p.V1088_Y1863del	stopgain	Pathogenic
g.43092273del	c.3258delA	p.V1088Ffs	frameshift deletion	Pathogenic
g.43092275dup	c.3257dupT	p.L1086Ffs	frameshift insertion	Pathogenic
g.43092273_43092274insTC	c.3257_3258insGA	p.G1087Kfs	frameshift insertion	Pathogenic
g.43092275del	c.3257delT	p.L1086fs	stopgain	Pathogenic
g.43092274_43092275insTC	c.3256_3257insGA	p.L1086fs	stopgain	Pathogenic
g.43092274A>C	c.T3257G	p.L1086X	stopgain	Pathogenic
g.43092274A>T	c.T3257A	p.L1086X	stopgain	Pathogenic
g.43092276dup	c.3255dupA	p.L1086Ifs	frameshift insertion	Pathogenic
g.43092277_43092278dup	c.3255_3256insGA	p.L1086Dfs	frameshift insertion	Pathogenic
g.43092276del	c.3255delA	p.R1085Sfs	frameshift deletion	Pathogenic
g.43092276_43092277insTC	c.3254_3255insGA	p.L1086Nfs	frameshift insertion	Pathogenic
g.43092278dup	c.3253dupA	p.R1085Kfs	frameshift insertion	Pathogenic
g.43092278T>A	c.A3253T	p.R1085X	stopgain	Pathogenic
g.43092280_43092284AGCAT	c.3247_3251del	p.M1083fs	frameshift deletion	Pathogenic
g.43092292A>T	c.T3239A	p.L1080X	stopgain	Pathogenic
g.43092293_43092300del	c.3231_3238del	p.P1078Efs	frameshift deletion	Pathogenic
g.43092302_43092303CT	c.3228_3229del	p.G1077Afs	frameshift deletion	Pathogenic
g.43092302_43092305del	c.3226_3229del	p.R1076Gfs	frameshift deletion	Pathogenic
g.43092305del	c.3226delA	p.R1076Efs	frameshift deletion	Pathogenic
g.43092305T>A	c.A3226T	p.R1076X	stopgain	Pathogenic
g.43092309dup	c.3224dupA	p.N1075Kfs	frameshift insertion	Pathogenic
g.43092313_43092314del	c.3217_3218del	p.G1073fs	frameshift deletion	Pathogenic
g.43092317del	c.3214delC	p.L1072fs	stopgain	Pathogenic
g.43092320_43092321dup	c.3212_3213insGA	p.L1072Nfs	frameshift insertion	Pathogenic
g.43092320dup	c.3211dupG	p.E1071Gfs	frameshift insertion	Pathogenic
g.43092320C>A	c.G3211T	p.E1071X	stopgain	Pathogenic
g.43092321dup	c.3210dupA	p.E1071Rfs	frameshift insertion	Pathogenic
g.43092325_43092383dup	c.3208_3209insTACTAATGAAGTGGGCTCCAGTATTAATGAAATAGGTTCCAGTGATGAAAACATTCAAG	p.A1070Vfs	stopgain	Pathogenic
g.43092327_43092330del	c.3203_3206del	p.I1068Kfs	frameshift deletion	Pathogenic
g.43092326del	c.3205delC	p.Q1069Kfs	frameshift deletion	Pathogenic
g.43092326G>A	c.C3205T	p.Q1069X	stopgain	Pathogenic
g.43092328del	c.3204delT	p.Q1069Kfs	frameshift deletion	Pathogenic
g.43092335dup	c.3196dupG	p.E1066Gfs	frameshift insertion	Pathogenic
g.43092335C>A	c.G3196T	p.E1066X	stopgain	Pathogenic
g.43092336_43092337insC	c.3194_3195insG	p.D1065Efs	frameshift insertion	Pathogenic
g.43092338dup	c.3193dupG	p.D1065Gfs	frameshift insertion	Pathogenic
g.43092342_43092343delinsC	c.3188_3189G	p.S1063fs	stopgain	Pathogenic
g.43092348del	c.3183delA	p.I1061Mfs	frameshift deletion	Pathogenic
g.43092349del	c.3182delT	p.I1061Kfs	frameshift deletion	Pathogenic
g.43092352del	c.3181delA	p.I1061fs	stopgain	Pathogenic
g.43092353C>A	c.G3178T	p.E1060X	stopgain	Pathogenic
g.43092358del	c.3174delT	p.N1059Mfs	frameshift deletion	Pathogenic
g.43092359_43092362del	c.3169_3172del	p.S1057Lfs	frameshift deletion	Pathogenic
g.43092364del	c.3168delC	p.S1057Vfs	frameshift deletion	Pathogenic
g.43092368_43092371dup	c.3164_3165insTGGG	p.S1056Gfs	frameshift insertion	Pathogenic
g.43092369del	c.3164delG	p.G1055Afs	frameshift deletion	Pathogenic
g.43092372_43092373insC	c.3158_3159insG	p.V1054Sfs	frameshift insertion	Pathogenic
g.43092374dup	c.3157dupG	p.E1053Gfs	frameshift insertion	Pathogenic
g.43092374del	c.3157delG	p.E1053Kfs	frameshift deletion	Pathogenic
g.43092374C>A	c.G3157T	p.E1053X	stopgain	Pathogenic
g.43092377del	c.3155delA	p.N1052Mfs	frameshift deletion	Pathogenic
g.43092387del	c.3145delT	p.S1049Pfs	frameshift deletion	Pathogenic
g.43092389del	c.3143delG	p.G1048Vfs	frameshift deletion	Pathogenic
g.43092391_43092394del	c.3138_3141del	p.G1048Pfs	frameshift deletion	Pathogenic
g.43092395_43092398del	c.3135_3138del	p.N1045Kfs	frameshift deletion	Pathogenic
g.43092395_43092404del	c.3129_3138del	p.N1043Kfs	frameshift deletion	Pathogenic
g.43092399_43092408del	c.3125_3134del	p.S1042Mfs	frameshift deletion	Pathogenic
g.43092400del	c.3132delT	p.N1045Mfs	frameshift deletion	Pathogenic
g.43092409G>C	c.C3122G	p.S1041X	stopgain	Pathogenic
g.43092414_43092417del	c.3117_3120del	p.S1040Qfs	frameshift deletion	Pathogenic
g.43092415del	c.3117delC	p.S1040Afs	frameshift deletion	Pathogenic
g.43092414_43092417delinsTC	c.3114_3117GA	p.A1039Kfs	frameshift substitution	Pathogenic
g.43092416del	c.3115delG	p.A1039Pfs	frameshift deletion	Pathogenic
g.43092417_43092418del	c.3113_3114del	p.E1038Gfs	frameshift deletion	Pathogenic
g.43092416_43092418delinsTC	c.3113_3115GA	p.E1038Gfs	frameshift substitution	Pathogenic
g.43092419_43092424del	c.3107_3112del	p.F1036_Y1863del	stopgain	Pathogenic
g.43092419C>A	c.G3112T	p.E1038X	stopgain	Pathogenic
g.43092420_43092421insA	c.3110_3111insT	p.K1037Nfs	frameshift insertion	Pathogenic
g.43092421_43092422insA	c.3109_3110insT	p.K1037Ifs	frameshift insertion	Pathogenic
g.43092422_43092425del	c.3106_3109del	p.F1036Kfs	frameshift deletion	Pathogenic
g.43092427dup	c.3108dupT	p.K1037fs	stopgain	Pathogenic
g.43092427del	c.3108delT	p.F1036Lfs	frameshift deletion	Pathogenic
g.43092428_43092429del	c.3103_3104del	p.V1035Ffs	frameshift deletion	Pathogenic
g.43092433_43092446dup	c.3100_3101insTAACATTAGAGAAA	p.N1034Ifs	frameshift insertion	Pathogenic
g.43092434C>A	c.G3097T	p.E1033X	stopgain	Pathogenic
g.43092435del	c.3096delA	p.E1033Kfs	frameshift deletion	Pathogenic
g.43092437_43092447del	c.3084_3094del	p.N1029Rfs	frameshift deletion	Pathogenic
g.43092440dup	c.3091dupA	p.I1031Nfs	frameshift insertion	Pathogenic
g.43092448del	c.3083delG	p.R1028Lfs	frameshift deletion	Pathogenic
g.43092455_43092456insGTGCTCACTGTACTTGGAATGATCTCATTTCCCATTTCTCTTTCAGGTGACATTGAATGTTCCTCAAAGTTTTCCT	c.3076_3077insGGAAAACTTTGAGGAACATTCAATGTCACCTGAAAGAGAAATGGGAAATGAGATCATTCCAAGTACAGTGAGCACA	p.I1026Rfs	stopgain	Pathogenic
g.43092477_43092478insATCTCATTTCCCATTTCTCTTTCAGGTGACATTGAATGTTCCTCAAAGTTTTCCTGTGCTCACTGTACTTGGAATG	c.3075_3076insGGAAAACTTTGAGGAACATTCAATGTCACCTGAAAGAGAAATGGGAAATGAGATCATTCCAAGTACAGTGAGCACA	p.I1026Gfs	stopgain	Pathogenic
g.43092463del	c.3068delT	p.V1023Gfs	frameshift deletion	Pathogenic
g.43092465del	c.3066delA	p.V1023fs	frameshift deletion	Pathogenic
g.43092467dup	c.3064dupA	p.T1022Nfs	frameshift insertion	Pathogenic
g.43092469del	c.3062delG	p.S1021Ifs	frameshift deletion	Pathogenic
g.43092473del	c.3059delC	p.P1020Qfs	frameshift deletion	Pathogenic
g.43092472_43092475del	c.3056_3059del	p.I1019Kfs	frameshift deletion	Pathogenic
g.43092476_43092477insTCTCA	c.3054_3055insTGAGA	p.I1019fs	stopgain	Pathogenic
g.43092478_43092479insCTCAT	c.3053_3054insTGAGA	p.I1019Efs	frameshift insertion	Pathogenic
g.43092480_43092484dup	c.3052_3053insTGAGA	p.N1018Mfs	frameshift insertion	Pathogenic
g.43092482C>A	c.G3049T	p.E1017X	stopgain	Pathogenic
g.43092489dup	c.3044dupG	p.N1016Kfs	frameshift insertion	Pathogenic
g.43092494_43092495CT	c.3037_3038del	p.E1013Nfs	frameshift deletion	Pathogenic
g.43092498_43092499del	c.3033_3034del	p.E1013Nfs	frameshift deletion	Pathogenic
g.43092501_43092502del	c.3029_3030del	p.P1010Rfs	frameshift deletion	Pathogenic
g.43092505G>T	c.C3026A	p.S1009X	stopgain	Pathogenic
g.43092507dup	c.3024dupG	p.S1009Vfs	frameshift insertion	Pathogenic
g.43092509_43092512del	c.3020_3023del	p.S1007Cfs	frameshift deletion	Pathogenic
g.43092512_43092515del	c.3018_3021del	p.H1006Qfs	frameshift deletion	Pathogenic
g.43092511_43092515del	c.3016_3020del	p.H1006Nfs	frameshift deletion	Pathogenic
g.43092511G>C	c.C3020G	p.S1007X	stopgain	Pathogenic
g.43092511G>T	c.C3020A	p.S1007X	stopgain	Pathogenic
g.43092517dup	c.3015dupA	p.H1006Tfs	frameshift insertion	Pathogenic
g.43092517del	c.3015delA	p.E1005Dfs	frameshift deletion	Pathogenic
g.43092519del	c.3013delG	p.E1005Nfs	frameshift deletion	Pathogenic
g.43092520_43092521del	c.3011_3012del	p.E1004Gfs	frameshift deletion	Pathogenic
g.43092521C>A	c.G3010T	p.E1004X	stopgain	Pathogenic
g.43092523_43092524del	c.3008_3009del	p.F1003fs	stopgain	Pathogenic
g.43092522_43092525del	c.3006_3009del	p.N1002Kfs	frameshift deletion	Pathogenic
g.43092529del	c.3005delA	p.N1002Tfs	frameshift deletion	Pathogenic
g.43092530C>A	c.G3001T	p.E1001X	stopgain	Pathogenic
g.43092532del	c.2999delA	p.E1000Gfs	frameshift deletion	Pathogenic
g.43092535_43092536delinsTA	c.2995_2996TA	p.L999_Y1863del	stopgain	Pathogenic
g.43092544_43092545dup	c.2990_2991insAA	p.N997Kfs	frameshift insertion	Pathogenic
g.43092545del	c.2990delA	p.N997Ifs	frameshift deletion	Pathogenic
g.43092544_43092560del	c.2974_2990del	p.T992Sfs	frameshift deletion	Pathogenic
g.43092548del	c.2984delA	p.K995Rfs	frameshift deletion	Pathogenic
g.43092548T>A	c.A2983T	p.K995X	stopgain	Pathogenic
g.43092550_43092551del	c.2981_2982del	p.C994fs	stopgain	Pathogenic
g.43092550del	c.2981delG	p.C994Lfs	frameshift deletion	Pathogenic
g.43092551del	c.2980delT	p.C994Vfs	frameshift deletion	Pathogenic
g.43092554_43092560del	c.2973_2979del	p.K991Nfs	frameshift deletion	Pathogenic
g.43092560del	c.2974delA	p.T992Lfs	frameshift deletion	Pathogenic
g.43092560T>A	c.A2971T	p.K991X	stopgain	Pathogenic
g.43092562del	c.2970delT	p.T992Lfs	frameshift deletion	Pathogenic
g.43092566del	c.2967delT	p.F989Lfs	frameshift deletion	Pathogenic
g.43092570_43092574del	c.2960_2964del	p.K987Ifs	frameshift deletion	Pathogenic
g.43092568G>T	c.C2963A	p.S988X	stopgain	Pathogenic
g.43092572dup	c.2960dupA	p.S988Vfs	frameshift insertion	Pathogenic
g.43092572T>A	c.A2959T	p.K987X	stopgain	Pathogenic
g.43092578del	c.2955delC	p.I986Sfs	frameshift deletion	Pathogenic
g.43092583dup	c.2952dupT	p.P985Sfs	frameshift insertion	Pathogenic
g.43092583del	c.2952delT	p.I986Sfs	frameshift deletion	Pathogenic
g.43092582_43092583del	c.2951_2952del	p.F984Sfs	frameshift deletion	Pathogenic
g.43092584del	c.2947delC	p.L983Ffs	frameshift deletion	Pathogenic
g.43092587del	c.2945delC	p.P982Hfs	frameshift deletion	Pathogenic
g.43092591del	c.2940delA	p.P981Hfs	frameshift deletion	Pathogenic
g.43092593del	c.2938delA	p.I980Yfs	frameshift deletion	Pathogenic
g.43092597del	c.2934delT	p.R979Vfs	frameshift deletion	Pathogenic
g.43092598dup	c.2933dupA	p.Y978fs	stopgain	Pathogenic
g.43092597A>C	c.T2934G	p.Y978X	stopgain	Pathogenic
g.43092597A>T	c.T2934A	p.Y978X	stopgain	Pathogenic
g.43092602_43092603dup	c.2930_2931insCC	p.Y978Hfs	frameshift insertion	Pathogenic
g.43092607del	c.2927delA	p.N976Tfs	frameshift deletion	Pathogenic
g.43092608G>A	c.C2923T	p.Q975X	stopgain	Pathogenic
g.43092613dup	c.2921dupT	p.L974Ffs	frameshift insertion	Pathogenic
g.43092613del	c.2921delT	p.L974Yfs	frameshift deletion	Pathogenic
g.43092612_43092613del	c.2920_2921del	p.L974Tfs	frameshift deletion	Pathogenic
g.43092610A>T	c.T2921A	p.L974X	stopgain	Pathogenic
g.43092611_43092614del	c.2917_2920del	p.L973Yfs	frameshift deletion	Pathogenic
g.43092617del	c.2915delG	p.G972Dfs	frameshift deletion	Pathogenic
g.43092617C>A	c.G2914T	p.G972X	stopgain	Pathogenic
g.43092618_43092619del	c.2912_2913del	p.H971Rfs	frameshift deletion	Pathogenic
g.43092623del	c.2910delA	p.K970Nfs	frameshift deletion	Pathogenic
g.43092624del	c.2907delT	p.N969Kfs	frameshift deletion	Pathogenic
g.43092623_43092625delinsAG	c.2906_2908CT	p.N969Tfs	frameshift substitution	Pathogenic
g.43092627del	c.2906delA	p.N969Ifs	frameshift deletion	Pathogenic
g.43092626_43092627insGA	c.2904_2905insTC	p.N969Sfs	frameshift insertion	Pathogenic
g.43092629dup	c.2903dupC	p.N969Kfs	frameshift insertion	Pathogenic
g.43092628_43092629insAG	c.2903_2904insTC	p.N969Qfs	frameshift insertion	Pathogenic
g.43092630_43092631dup	c.2902_2903insTC	p.P968Lfs	frameshift insertion	Pathogenic
g.43092634del	c.2898delT	p.T967Lfs	frameshift deletion	Pathogenic
g.43092641_43092642del	c.2889_2890del	p.G964Tfs	frameshift deletion	Pathogenic
g.43092641C>A	c.G2890T	p.G964X	stopgain	Pathogenic
g.43092646del	c.2887delA	p.T963Lfs	frameshift deletion	Pathogenic
g.43092650del	c.2882delA	p.N961Tfs	frameshift deletion	Pathogenic
g.43092652_43092653del	c.2878_2879del	p.G960Qfs	frameshift deletion	Pathogenic
g.43092659_43092663del	c.2872_2876del	p.F958Rfs	frameshift deletion	Pathogenic
g.43092656del	c.2875delA	p.R959Efs	frameshift deletion	Pathogenic
g.43092656T>A	c.A2875T	p.R959X	stopgain	Pathogenic
g.43092658_43092659insT	c.2872_2873insA	p.F958Yfs	frameshift insertion	Pathogenic
g.43092659_43092660insT	c.2871_2872insA	p.F958Ifs	frameshift insertion	Pathogenic
g.43092661dup	c.2870dupA	p.F958Vfs	frameshift insertion	Pathogenic
g.43092664_43092668del	c.2866_2870del	p.S956Vfs	frameshift deletion	Pathogenic
g.43092662G>A	c.C2869T	p.Q957X	stopgain	Pathogenic
g.43092663del	c.2868delT	p.Q957Sfs	frameshift deletion	Pathogenic
g.43092664del	c.2867delC	p.S956Ffs	frameshift deletion	Pathogenic
g.43092665dup	c.2866dupT	p.S956Ffs	frameshift insertion	Pathogenic
g.43092666del	c.2865delA	p.S956Lfs	frameshift deletion	Pathogenic
g.43092666_43092667insA	c.2864_2865insT	p.S956Ifs	frameshift insertion	Pathogenic
g.43092669_43092672del	c.2861_2864del	p.L954Hfs	frameshift deletion	Pathogenic
g.43092667_43092671del	c.2860_2864del	p.L954Ifs	frameshift deletion	Pathogenic
g.43092667G>C	c.C2864G	p.S955X	stopgain	Pathogenic
g.43092667G>T	c.C2864A	p.S955X	stopgain	Pathogenic
g.43092670dup	c.2861dupT	p.S955Ifs	frameshift insertion	Pathogenic
g.43092670del	c.2861delT	p.L954Hfs	frameshift deletion	Pathogenic
g.43092676_43092677del	c.2856_2857del	p.F952Lfs	frameshift deletion	Pathogenic
g.43092681_43092690del	c.2844_2853del	p.G949Ffs	frameshift deletion	Pathogenic
g.43092679_43092680insG	c.2851_2852insC	p.R951Tfs	frameshift insertion	Pathogenic
g.43092681dup	c.2850dupT	p.R951fs	stopgain	Pathogenic
g.43092680_43092681insG	c.2850_2851insC	p.R951Qfs	frameshift insertion	Pathogenic
g.43092683dup	c.2848dupT	p.S950Ffs	frameshift insertion	Pathogenic
g.43092689del	c.2843delG	p.G948Efs	frameshift deletion	Pathogenic
g.43092691_43092692del	c.2840_2841del	p.K947Rfs	frameshift deletion	Pathogenic
g.43092692T>A	c.A2839T	p.K947X	stopgain	Pathogenic
g.43092695_43092696del	c.2836_2837del	p.I946Qfs	frameshift deletion	Pathogenic
g.43092696dup	c.2835dupT	p.I946Yfs	frameshift insertion	Pathogenic
g.43092695_43092696insGG	c.2835_2836insCC	p.I946Pfs	frameshift insertion	Pathogenic
g.43092695_43092697delinsG	c.2834_2836C	p.S945Tfs	frameshift substitution	Pathogenic
g.43092696_43092697del	c.2834_2835del	p.S945Nfs	frameshift deletion	Pathogenic
g.43092699A>T	c.T2832A	p.C944X	stopgain	Pathogenic
g.43092701del	c.2830delT	p.C944Vfs	frameshift deletion	Pathogenic
g.43092701_43092711delinsTTATCAAACTGGCTTATCTT	c.2820_2830AAGATAAGCCAGTTTGATAA	p.D940_Y1863delinsER	stopgain	Pathogenic
g.43092708_43092720del	c.2815_2827del	p.V939Nfs	frameshift deletion	Pathogenic
g.43092708del	c.2823delT	p.N941Kfs	frameshift deletion	Pathogenic
g.43092717del	c.2814delA	p.V939Lfs	frameshift deletion	Pathogenic
g.43092718_43092719del	c.2812_2813del	p.P938Sfs	frameshift deletion	Pathogenic
g.43092718_43092719delinsC	c.2812_2813G	p.P938Efs	frameshift substitution	Pathogenic
g.43092720_43092723del	c.2808_2811del	p.K937Qfs	frameshift deletion	Pathogenic
g.43092723_43092726del	c.2806_2809del	p.D936Sfs	frameshift deletion	Pathogenic
g.43092722T>A	c.A2809T	p.K937X	stopgain	Pathogenic
g.43092725_43092726del	c.2806_2807del	p.D936fs	frameshift deletion	Pathogenic
g.43092728dup	c.2805dupA	p.D936Rfs	frameshift insertion	Pathogenic
g.43092728del	c.2805delA	p.D936Ifs	frameshift deletion	Pathogenic
g.43092729del	c.2802delG	p.D936Ifs	frameshift deletion	Pathogenic
g.43092731G>A	c.C2800T	p.Q934X	stopgain	Pathogenic
g.43092732del	c.2799delT	p.Q934Rfs	frameshift deletion	Pathogenic
g.43092732_43092733del	c.2798_2799del	p.G933Afs	frameshift deletion	Pathogenic
g.43092732_43092735ACCA	c.2796_2799del	p.G933Rfs	frameshift deletion	Pathogenic
g.43092736del	c.2796delT	p.G933Vfs	frameshift deletion	Pathogenic
g.43092742_43092743insAAAGCCTGCAGTGATAA	c.2788_2789insTTATCACTGCAGGCTTT	p.P930Lfs	frameshift insertion	Pathogenic
g.43092759_43092760insAAAAGCCTGCAGTGATA	c.2787_2788insTTATCACTGCAGGCTTT	p.P930Lfs	frameshift insertion	Pathogenic
g.43092749del	c.2783delG	p.G928Afs	frameshift deletion	Pathogenic
g.43092753dup	c.2778dupT	p.A927Cfs	frameshift insertion	Pathogenic
g.43092753_43092754insTA	c.2778_2779insAT	p.A927Mfs	frameshift insertion	Pathogenic
g.43092755_43092756del	c.2776_2777del	p.T926Cfs	frameshift deletion	Pathogenic
g.43092755_43092756insAT	c.2776_2777insTA	p.T926Ifs	frameshift insertion	Pathogenic
g.43092757del	c.2774delT	p.I925Tfs	frameshift deletion	Pathogenic
g.43092762_43092765del	c.2767_2770del	p.V923Ifs	frameshift deletion	Pathogenic
g.43092764_43092767CTGT	c.2764_2767del	p.T922Lfs	frameshift deletion	Pathogenic
g.43092765del	c.2766delA	p.V923Lfs	frameshift deletion	Pathogenic
g.43092769del	c.2762delA	p.Q921Rfs	frameshift deletion	Pathogenic
g.43092770G>A	c.C2761T	p.Q921X	stopgain	Pathogenic
g.43092771del	c.2760delA	p.Q921Rfs	frameshift deletion	Pathogenic
g.43092775_43092776insCACCC	c.2755_2756insGGGTG	p.P919Rfs	frameshift insertion	Pathogenic
g.43092777_43092778insACCCC	c.2754_2755insGGGTG	p.P919Gfs	frameshift insertion	Pathogenic
g.43092776_43092778delinsTG	c.2753_2755CA	p.K918Tfs	frameshift substitution	Pathogenic
g.43092780del	c.2751delC	p.K918Sfs	frameshift deletion	Pathogenic
g.43092781del	c.2750delT	p.I917Tfs	frameshift deletion	Pathogenic
g.43092783_43092793del	c.2740_2750del	p.E914Qfs	frameshift deletion	Pathogenic
g.43092782dup	c.2749dupA	p.I917Nfs	frameshift insertion	Pathogenic
g.43092783del	c.2748delT	p.N916Kfs	frameshift deletion	Pathogenic
g.43092786dup	c.2745dupT	p.N916fs	stopgain	Pathogenic
g.43092787_43092788del	c.2744_2745del	p.S915fs	stopgain	Pathogenic
g.43092791C>A	c.G2740T	p.E914X	stopgain	Pathogenic
g.43092803_43092806del	c.2727_2730del	p.N909Kfs	frameshift deletion	Pathogenic
g.43092803_43092807del	c.2726_2730del	p.N909Rfs	frameshift deletion	Pathogenic
g.43092803del	c.2728delC	p.Q910Kfs	frameshift deletion	Pathogenic
g.43092803G>A	c.C2728T	p.Q910X	stopgain	Pathogenic
g.43092808dup	c.2726dupA	p.N909Kfs	frameshift insertion	Pathogenic
g.43092808del	c.2726delA	p.N909Ifs	frameshift deletion	Pathogenic
g.43092812_43092815del	c.2719_2722del	p.E907Kfs	frameshift deletion	Pathogenic
g.43092809C>A	c.G2722T	p.E908X	stopgain	Pathogenic
g.43092813del	c.2719delG	p.E907Kfs	frameshift deletion	Pathogenic
g.43092812C>A	c.G2719T	p.E907X	stopgain	Pathogenic
g.43092817del	c.2717delA	p.K906Rfs	frameshift deletion	Pathogenic
g.43092818G>A	c.C2713T	p.Q905X	stopgain	Pathogenic
g.43092821del	c.2710delG	p.E904Nfs	frameshift deletion	Pathogenic
g.43092821_43092822CA	c.2709_2710del	p.C903fs	stopgain	Pathogenic
g.43092821C>A	c.G2710T	p.E904X	stopgain	Pathogenic
g.43092822del	c.2709delT	p.C903Wfs	frameshift deletion	Pathogenic
g.43092822A>T	c.T2709A	p.C903X	stopgain	Pathogenic
g.43092824_43092825dup	c.2707_2708insAT	p.C903Yfs	frameshift insertion	Pathogenic
g.43092824del	c.2707delT	p.C903Vfs	frameshift deletion	Pathogenic
g.43092826del	c.2706delA	p.E902Dfs	frameshift deletion	Pathogenic
g.43092827del	c.2704delG	p.E902Nfs	frameshift deletion	Pathogenic
g.43092830_43092831del	c.2702_2703del	p.F901fs	stopgain	Pathogenic
g.43092836del	c.2695delG	p.V899Sfs	frameshift deletion	Pathogenic
g.43092840dup	c.2694dupA	p.V899Sfs	frameshift insertion	Pathogenic
g.43092839_43092840dup	c.2694_2695insAA	p.V899Kfs	frameshift insertion	Pathogenic
g.43092840del	c.2694delA	p.V899Sfs	frameshift deletion	Pathogenic
g.43092842_43092848del	c.2687_2693del	p.S896Kfs	frameshift deletion	Pathogenic
g.43092841_43092851del	c.2683_2693del	p.Q895Sfs	frameshift deletion	Pathogenic
g.43092840_43092841dup	c.2691_2692insCA	p.K898Qfs	frameshift insertion	Pathogenic
g.43092842_43092843insTG	c.2689_2690insAC	p.P897Hfs	frameshift insertion	Pathogenic
g.43092842_43092843insT	c.2688_2689insA	p.P897Tfs	frameshift insertion	Pathogenic
g.43092843_43092844insT	c.2687_2688insA	p.S896Rfs	frameshift insertion	Pathogenic
g.43092848_43092855del	c.2680_2687del	p.K894Sfs	frameshift deletion	Pathogenic
g.43092847dup	c.2686dupA	p.S896Kfs	frameshift insertion	Pathogenic
g.43092847del	c.2686delA	p.S896Vfs	frameshift deletion	Pathogenic
g.43092846_43092847del	c.2685_2686del	p.P897Kfs	frameshift deletion	Pathogenic
g.43092848_43092851del	c.2683_2686del	p.Q895Vfs	frameshift deletion	Pathogenic
g.43092848G>A	c.C2683T	p.Q895X	stopgain	Pathogenic
g.43092851del	c.2682delA	p.K894Nfs	frameshift deletion	Pathogenic
g.43092850_43092851del	c.2681_2682del	p.K894Tfs	frameshift deletion	Pathogenic
g.43092852_43092855del	c.2679_2682del	p.K893Nfs	frameshift deletion	Pathogenic
g.43092852_43092853del	c.2679_2680del	p.K894Tfs	frameshift deletion	Pathogenic
g.43092851T>A	c.A2680T	p.K894X	stopgain	Pathogenic
g.43092855dup	c.2678dupA	p.K894Efs	frameshift insertion	Pathogenic
g.43092853_43092856del	c.2675_2678del	p.L892fs	stopgain	Pathogenic
g.43092854T>A	c.A2677T	p.K893X	stopgain	Pathogenic
g.43092856A>C	c.T2675G	p.L892X	stopgain	Pathogenic
g.43092860del	c.2671delT	p.S891Pfs	frameshift deletion	Pathogenic
g.43092863del	c.2670delG	p.S891Pfs	frameshift deletion	Pathogenic
g.43092865dup	c.2666dupC	p.G890Wfs	frameshift insertion	Pathogenic
g.43092866dup	c.2665dupT	p.S889Ffs	frameshift insertion	Pathogenic
g.43092870_43092871insT	c.2660_2661insA	p.H888Pfs	frameshift insertion	Pathogenic
g.43092872dup	c.2659dupG	p.A887Gfs	frameshift insertion	Pathogenic
g.43092871_43092872insT	c.2659_2660insA	p.A887Dfs	frameshift insertion	Pathogenic
g.43092872_43092873insT	c.2658_2659insA	p.A887Sfs	frameshift insertion	Pathogenic
g.43092874_43092875GA	c.2657_2658del	p.S886Cfs	frameshift deletion	Pathogenic
g.43092878dup	c.2654dupT	p.S886Lfs	frameshift insertion	Pathogenic
g.43092878del	c.2654delT	p.F885Sfs	frameshift deletion	Pathogenic
g.43092879dup	c.2652dupA	p.F885Ifs	frameshift insertion	Pathogenic
g.43092881_43092882insGCCT	c.2650_2651insGGCA	p.T884Rfs	frameshift insertion	Pathogenic
g.43092881_43092882del	c.2649_2650del	p.T884Ifs	frameshift deletion	Pathogenic
g.43092881_43092882insAGCC	c.2649_2650insGGCT	p.T884Gfs	frameshift insertion	Pathogenic
g.43092884_43092885insCTGC	c.2649_2650insGGCA	p.T884Gfs	frameshift insertion	Pathogenic
g.43092882_43092883insTGCC	c.2648_2649insGGCA	p.T884Afs	frameshift insertion	Pathogenic
g.43092883_43092885del	c.2646_2648del	p.C882_Y1863del	stopgain	Pathogenic
g.43092883_43092884insTGCC	c.2647_2648insGGCA	p.A883Gfs	frameshift insertion	Pathogenic
g.43092889dup	c.2643dupA	p.C882Mfs	frameshift insertion	Pathogenic
g.43092889del	c.2643delA	p.E881Dfs	frameshift deletion	Pathogenic
g.43092890C>A	c.G2641T	p.E881X	stopgain	Pathogenic
g.43092895del	c.2637delA	p.E880Rfs	frameshift deletion	Pathogenic
g.43092896C>A	c.G2635T	p.E879X	stopgain	Pathogenic
g.43092903del	c.2630delA	p.N877Mfs	frameshift deletion	Pathogenic
g.43092912del	c.2621delA	p.N874Ifs	frameshift deletion	Pathogenic
g.43092911_43092912del	c.2620_2621del	p.N874Sfs	frameshift deletion	Likely_pathogenic
g.43092917dup	c.2617dupT	p.S873Ffs	frameshift insertion	Pathogenic
g.43092917del	c.2617delT	p.S873Qfs	frameshift deletion	Pathogenic
g.43092918_43092919insA	c.2612_2613insT	p.F872Vfs	frameshift insertion	Pathogenic
g.43092920dup	c.2612dupC	p.F872Vfs	frameshift insertion	Pathogenic
g.43092919_43092920del	c.2611_2612del	p.P871Vfs	frameshift deletion	Pathogenic
g.43092919delinsAA	c.2612delinsTT	p.P871Lfs	frameshift substitution	Pathogenic
g.43092929_43092932dup	c.2604_2605insGTCA	p.F869Vfs	frameshift insertion	Pathogenic
g.43092928G>C	c.C2603G	p.S868X	stopgain	Pathogenic
g.43092928G>T	c.C2603A	p.S868X	stopgain	Pathogenic
g.43092932G>A	c.C2599T	p.Q867X	stopgain	Pathogenic
g.43092939del	c.2594delA	p.K865Sfs	frameshift deletion	Pathogenic
g.43092937_43092942delinsAAAAGAAT	c.2589_2594ATTCTTTT	p.S864Ffs	frameshift substitution	Pathogenic
g.43092943_43092950del	c.2586_2593del	p.V863Afs	frameshift deletion	Pathogenic
g.43092938T>A	c.A2593T	p.K865X	stopgain	Pathogenic
g.43092940G>C	c.C2591G	p.S864X	stopgain	Pathogenic
g.43092943dup	c.2590dupT	p.S864Ffs	frameshift insertion	Pathogenic
g.43092945del	c.2587delG	p.V863Ffs	frameshift deletion	Pathogenic
g.43092952_43092953insAA	c.2578_2579insTT	p.T860Ifs	frameshift insertion	Pathogenic
g.43092954_43092955insAA	c.2577_2578insTT	p.T860Lfs	frameshift insertion	Pathogenic
g.43092956del	c.2576delA	p.N859Ifs	frameshift deletion	Pathogenic
g.43092959G>A	c.C2572T	p.Q858X	stopgain	Pathogenic
g.43092961A>T	c.T2570A	p.L857X	stopgain	Pathogenic
g.43092963A>C	c.T2568G	p.Y856X	stopgain	Pathogenic
g.43092964del	c.2567delA	p.Y856Ffs	frameshift deletion	Pathogenic
g.43092965_43092966insATCAA	c.2566_2567insTGATT	p.Y856Lfs	frameshift insertion	Pathogenic
g.43092967_43092971del	c.2561_2565del	p.A854Vfs	frameshift deletion	Pathogenic
g.43092968_43092969insCG	c.2563_2564insGC	p.Q855Rfs	frameshift insertion	Pathogenic
g.43092968G>A	c.C2563T	p.Q855X	stopgain	Pathogenic
g.43092968_43092969insGC	c.2562_2563insGC	p.Q855Afs	frameshift insertion	Pathogenic
g.43092970_43092971dup	c.2561_2562insGC	p.Q855Lfs	frameshift insertion	Pathogenic
g.43092973dup	c.2558dupA	p.D853Efs	frameshift insertion	Pathogenic
g.43092973_43092974insGAAAAGTGAA	c.2557_2558insTTCACTTTTC	p.D853Vfs	frameshift insertion	Pathogenic
g.43092976dup	c.2556dupT	p.D853fs	stopgain	Pathogenic
g.43092974_43092975insGAAAAGTGAA	c.2556_2557insTTCACTTTTC	p.D853Ffs	frameshift insertion	Pathogenic
g.43092976del	c.2556delT	p.D853Mfs	frameshift deletion	Pathogenic
g.43092978_43092979dup	c.2553_2554insAA	p.L852Nfs	frameshift insertion	Pathogenic
g.43092978_43092979del	c.2552_2553del	p.E851Afs	frameshift deletion	Pathogenic
g.43092980del	c.2551delG	p.E851Nfs	frameshift deletion	Pathogenic
g.43092981_43092982del	c.2550_2551del	p.S850Rfs	frameshift deletion	Pathogenic
g.43092980C>A	c.G2551T	p.E851X	stopgain	Pathogenic
g.43092985del	c.2548delA	p.S850Vfs	frameshift deletion	Pathogenic
g.43092987_43092990del	c.2542_2545del	p.E848Kfs	frameshift deletion	Pathogenic
g.43092986C>A	c.G2545T	p.E849X	stopgain	Pathogenic
g.43092991_43092993delinsC	c.2538_2540G	p.M847Gfs	frameshift substitution	Pathogenic
g.43092997_43093001del	c.2532_2536del	p.S844Rfs	frameshift deletion	Pathogenic
g.43092995C>A	c.G2536T	p.E846X	stopgain	Pathogenic
g.43093001_43093002del	c.2529_2530del	p.S844Hfs	frameshift deletion	Pathogenic
g.43093006del	c.2527delA	p.T843Qfs	frameshift deletion	Pathogenic
g.43093009dup	c.2524dupG	p.E842Gfs	frameshift insertion	Pathogenic
g.43093007C>A	c.G2524T	p.E842X	stopgain	Pathogenic
g.43093011_43093014del	c.2518_2521del	p.S840Gfs	frameshift deletion	Pathogenic
g.43093013del	c.2518delA	p.S840Vfs	frameshift deletion	Pathogenic
g.43093013_43093014TG	c.2517_2518del	p.H839Qfs	frameshift deletion	Pathogenic
g.43093017del	c.2515delC	p.H839Tfs	frameshift deletion	Pathogenic
g.43093019del	c.2513delA	p.N838Tfs	frameshift deletion	Pathogenic
g.43093021del	c.2511delT	p.N838Tfs	frameshift deletion	Pathogenic
g.43093023_43093024del	c.2507_2508del	p.E836Gfs	frameshift deletion	Pathogenic
g.43093025del	c.2506delG	p.E836Kfs	frameshift deletion	Pathogenic
g.43093027dup	c.2504dupA	p.H835Qfs	frameshift insertion	Pathogenic
g.43093027_43093043dup	c.2504_2505insAAGTATCCATTGGGACA	p.H835Qfs	frameshift insertion	Pathogenic
g.43093032del	c.2501delG	p.G834Dfs	frameshift deletion	Pathogenic
g.43093034dup	c.2498dupT	p.L833Ffs	frameshift insertion	Pathogenic
g.43093034_43093041dup	c.2497_2498insGTATCCAT	p.L833Cfs	frameshift insertion	Pathogenic
g.43093035_43093044dup	c.2497_2498insAAGTATCCAT	p.L833fs	stopgain	Pathogenic
g.43093033A>T	c.T2498A	p.L833X	stopgain	Pathogenic
g.43093038_43093039insCA	c.2493_2494insGT	p.P832Vfs	frameshift insertion	Pathogenic
g.43093041_43093044del	c.2489_2492del	p.K830Ifs	frameshift deletion	Pathogenic
g.43093039_43093054delinsCA	c.2477_2492TG	p.T826Mfs	frameshift substitution	Pathogenic
g.43093041_43093042insATGGATACTT	c.2489_2490insAAGTATCCAT	p.Y831Sfs	frameshift insertion	Pathogenic
g.43093042_43093043insAGGGG	c.2488_2489insCCCCT	p.K830Tfs	frameshift insertion	Pathogenic
g.43093043T>A	c.A2488T	p.K830X	stopgain	Pathogenic
g.43093046dup	c.2487dupT	p.K830fs	stopgain	Pathogenic
g.43093044_43093045insGGGGA	c.2487_2488insCCCCT	p.K830Pfs	frameshift insertion	Pathogenic
g.43093046del	c.2487delT	p.F829Lfs	frameshift deletion	Pathogenic
g.43093045_43093046del	c.2486_2487del	p.F829fs	stopgain	Pathogenic
g.43093051del	c.2481delA	p.G828Afs	frameshift deletion	Pathogenic
g.43093054_43093055GT	c.2477_2478del	p.T826Rfs	frameshift deletion	Pathogenic
g.43093054del	c.2477delC	p.T826Kfs	frameshift deletion	Pathogenic
g.43093055del	c.2476delA	p.T826Qfs	frameshift deletion	Pathogenic
g.43093056del	c.2475delC	p.D825Efs	frameshift deletion	Pathogenic
g.43093057dup	c.2474dupA	p.D825Efs	frameshift insertion	Pathogenic
g.43093058del	c.2473delG	p.D825Tfs	frameshift deletion	Pathogenic
g.43093062del	c.2471delA	p.N824Mfs	frameshift deletion	Pathogenic
g.43093063del	c.2468delG	p.R823Kfs	frameshift deletion	Pathogenic
g.43093064del	c.2467delA	p.R823Efs	frameshift deletion	Pathogenic
g.43093075del	c.2457delC	p.D821Ifs	frameshift deletion	Pathogenic
g.43093082del	c.2450delG	p.G817Vfs	frameshift deletion	Pathogenic
g.43093082_43093095del	c.2437_2450del	p.G813Lfs	frameshift deletion	Pathogenic
g.43093085_43093088del	c.2445_2448del	p.I815Mfs	frameshift deletion	Pathogenic
g.43093087dup	c.2445dupT	p.H816Sfs	frameshift insertion	Pathogenic
g.43093089dup	c.2443dupA	p.I815Nfs	frameshift insertion	Pathogenic
g.43093089del	c.2443delA	p.I815Ffs	frameshift deletion	Pathogenic
g.43093088_43093089insA	c.2442_2443insT	p.I815Yfs	frameshift insertion	Pathogenic
g.43093095dup	c.2438dupG	p.L814Tfs	frameshift insertion	Pathogenic
g.43093094C>A	c.G2437T	p.G813X	stopgain	Pathogenic
g.43093097T>A	c.A2434T	p.K812X	stopgain	Pathogenic
g.43093101dup	c.2433dupC	p.K812Qfs	frameshift insertion	Pathogenic
g.43093101del	c.2433delC	p.K812Rfs	frameshift deletion	Pathogenic
g.43093105dup	c.2429dupA	p.N810Kfs	frameshift insertion	Pathogenic
g.43093105del	c.2429delA	p.N810Tfs	frameshift deletion	Pathogenic
g.43093109del	c.2424delT	p.F808Lfs	frameshift deletion	Pathogenic
g.43093113dup	c.2418dupA	p.A807Sfs	frameshift insertion	Pathogenic
g.43093113del	c.2418delA	p.A807Hfs	frameshift deletion	Pathogenic
g.43093114_43093115del	c.2416_2417del	p.A806Sfs	frameshift deletion	Pathogenic
g.43093116A>T	c.T2415A	p.C805X	stopgain	Pathogenic
g.43093119_43093120del	c.2411_2412del	p.Q804Lfs	frameshift deletion	Pathogenic
g.43093120del	c.2411delA	p.Q804Rfs	frameshift deletion	Pathogenic
g.43093120_43093133del	c.2398_2411del	p.K800Vfs	frameshift deletion	Pathogenic
g.43093121_43093122del	c.2409_2410del	p.S803Rfs	frameshift deletion	Pathogenic
g.43093121G>A	c.C2410T	p.Q804X	stopgain	Pathogenic
g.43093122del	c.2409delT	p.Q804Sfs	frameshift deletion	Pathogenic
g.43093124_43093127del	c.2406_2409del	p.Q804Vfs	frameshift deletion	Pathogenic
g.43093124_43093125del	c.2407_2408del	p.Q804Vfs	frameshift deletion	Pathogenic
g.43093125_43093126CA	c.2405_2406del	p.V802Efs	frameshift deletion	Pathogenic
g.43093127_43093129delinsTTGATACAGTAAGTGCCGTCATGTTTTTGCTATAGGGGAAATG	c.2402_2404CATTTCCCCTATAGCAAAAACATGACGGCACTTACTGTATCAA	p.C801Sfs	stopgain	Likely_pathogenic
g.43093128A>T	c.T2403A	p.C801X	stopgain	Pathogenic
g.43093129del	c.2402delG	p.C801Lfs	frameshift deletion	Pathogenic
g.43093130_43093133ATTT	c.2398_2401del	p.K800Vfs	frameshift deletion	Pathogenic
g.43093137del	c.2396delA	p.N799Ifs	frameshift deletion	Pathogenic
g.43093139_43093193dup	c.2394_2395insGGAAAGTATCTCGTTACTGGAAGTTAGCACTCTAGGGAAGGCAAAAACAGAACCA	p.N799Gfs	stopgain	Pathogenic
g.43093139del	c.2393delC	p.P798Qfs	frameshift deletion	Pathogenic
g.43093138_43093139delinsT	c.2392_2393A	p.P798Kfs	frameshift substitution	Pathogenic
g.43093140_43093141del	c.2390_2391del	p.E797Afs	frameshift deletion	Pathogenic
g.43093142_43093143del	c.2389_2390del	p.E797Tfs	frameshift deletion	Pathogenic
g.43093142del	c.2389delG	p.E797Nfs	frameshift deletion	Pathogenic
g.43093142C>A	c.G2389T	p.E797X	stopgain	Pathogenic
g.43093144dup	c.2387dupC	p.E797Rfs	frameshift insertion	Pathogenic
g.43093149dup	c.2386dupA	p.T796Nfs	frameshift insertion	Pathogenic
g.43093144_43093145delinsA	c.2386_2387T	p.T796fs	stopgain	Pathogenic
g.43093149del	c.2386delA	p.T796Qfs	frameshift deletion	Pathogenic
g.43093152dup	c.2380dupG	p.A794Gfs	frameshift insertion	Pathogenic
g.43093154dup	c.2378dupA	p.A794Gfs	frameshift insertion	Pathogenic
g.43093157del	c.2376delG	p.K793Rfs	frameshift deletion	Pathogenic
g.43093163_43093164del	c.2368_2369del	p.T790Sfs	frameshift deletion	Pathogenic
g.43093169del	c.2362delG	p.V788Lfs	frameshift deletion	Pathogenic
g.43093171del	c.2361delA	p.V788Lfs	frameshift deletion	Pathogenic
g.43093173dup	c.2359dupG	p.E787Gfs	frameshift insertion	Pathogenic
g.43093173del	c.2359delG	p.E787Kfs	frameshift deletion	Pathogenic
g.43093174del	c.2357delT	p.L786Rfs	frameshift deletion	Pathogenic
g.43093176_43093182del	c.2351_2357del	p.S784Wfs	frameshift deletion	Pathogenic
g.43093175del	c.2356delC	p.L786Wfs	frameshift deletion	Pathogenic
g.43093176dup	c.2355dupA	p.L786Tfs	frameshift insertion	Pathogenic
g.43093177A>T	c.T2354A	p.L785X	stopgain	Pathogenic
g.43093180_43093181GA	c.2350_2351del	p.S784Vfs	frameshift deletion	Pathogenic
g.43093180G>T	c.C2351A	p.S784X	stopgain	Likely_pathogenic
g.43093184_43093185del	c.2347_2348del	p.I783Lfs	frameshift deletion	Pathogenic
g.43093185dup	c.2346dupT	p.I783Yfs	frameshift insertion	Pathogenic
g.43093185del	c.2346delT	p.S782Rfs	frameshift deletion	Likely_pathogenic
g.43093186del	c.2345delG	p.S782Ifs	frameshift deletion	Pathogenic
g.43093189dup	c.2344dupA	p.S782Kfs	frameshift insertion	Pathogenic
g.43093189_43093192del	c.2340_2343del	p.E781Vfs	frameshift deletion	Pathogenic
g.43093194_43093195del	c.2337_2338del	p.Q780Gfs	frameshift deletion	Pathogenic
g.43093193G>A	c.C2338T	p.Q780X	stopgain	Pathogenic
g.43093199_43093200dup	c.2332_2333insTG	p.G778Vfs	frameshift insertion	Pathogenic
g.43093200A>C	c.T2331G	p.Y777X	stopgain	Pathogenic
g.43093200A>T	c.T2331A	p.Y777X	stopgain	Pathogenic
g.43093203del	c.2329delT	p.Y777Mfs	frameshift deletion	Pathogenic
g.43093204dup	c.2327dupA	p.D776Efs	frameshift insertion	Pathogenic
g.43093209_43093221del	c.2311_2323del	p.V772Ifs	frameshift deletion	Pathogenic
g.43093209del	c.2322delT	p.T775Lfs	frameshift deletion	Pathogenic
g.43093214_43093220del	c.2311_2317del	p.P773Lfs	frameshift deletion	Pathogenic
g.43093216_43093217del	c.2314_2315del	p.V772Tfs	frameshift deletion	Pathogenic
g.43093218del	c.2314delG	p.V772Yfs	frameshift deletion	Pathogenic
g.43093218_43093224del	c.2307_2313del	p.I769Mfs	frameshift deletion	Pathogenic
g.43093218_43093219insG	c.2312_2313insC	p.L771Ffs	frameshift insertion	Pathogenic
g.43093219_43093220insG	c.2311_2312insC	p.L771Sfs	frameshift insertion	Pathogenic
g.43093221_43093239dup	c.2310_2311insAGAGAGTAGCAGTATTTCA	p.L771Rfs	stopgain	Pathogenic
g.43093222G>A	c.C2309T	p.S770L	nonsynonymous SNV	Pathogenic
g.43093222G>C	c.C2309G	p.S770X	stopgain	Pathogenic
g.43093222G>T	c.C2309A	p.S770X	stopgain	Pathogenic
g.43093225del	c.2308delT	p.S770Hfs	frameshift deletion	Pathogenic
g.43093229del	c.2302delA	p.S768Vfs	frameshift deletion	Pathogenic
g.43093232del	c.2299delA	p.S767Afs	frameshift deletion	Pathogenic
g.43093233dup	c.2298dupT	p.S767fs	stopgain	Pathogenic
g.43093233_43093234del	c.2297_2298del	p.S766Kfs	frameshift deletion	Pathogenic
g.43093234_43093235CT	c.2296_2297del	p.S766fs	frameshift deletion	Pathogenic
g.43093236del	c.2295delG	p.S766Vfs	frameshift deletion	Likely_pathogenic
g.43093238C>A	c.G2293T	p.E765X	stopgain	Pathogenic
g.43093242del	c.2289delT	p.V764fs	frameshift deletion	Pathogenic
g.43093248_43093249del	c.2283_2284del	p.R762Ifs	frameshift deletion	Pathogenic
g.43093251_43093285del	c.2246_2280del	p.D749Gfs	frameshift deletion	Pathogenic
g.43093255del	c.2278delA	p.T760Lfs	frameshift deletion	Pathogenic
g.43093256G>A	c.C2275T	p.Q759X	stopgain	Pathogenic
g.43093261dup	c.2273dupT	p.L758Ffs	frameshift insertion	Pathogenic
g.43093261del	c.2273delT	p.L758Cfs	frameshift deletion	Pathogenic
g.43093258A>T	c.T2273A	p.L758X	stopgain	Pathogenic
g.43093264del	c.2269delG	p.V757Ffs	frameshift deletion	Pathogenic
g.43093268del	c.2263delG	p.E755Kfs	frameshift deletion	Pathogenic
g.43093268C>A	c.G2263T	p.E755X	stopgain	Pathogenic
g.43093271_43093275del	c.2256_2260del	p.S753Rfs	frameshift deletion	Pathogenic
g.43093271C>A	c.G2260T	p.G754X	stopgain	Pathogenic
g.43093274_43093278del	c.2255_2259del	p.L752Wfs	frameshift deletion	Pathogenic
g.43093275dup	c.2257dupA	p.S753Kfs	frameshift insertion	Pathogenic
g.43093275_43093276dup	c.2256_2257insTA	p.S753fs	stopgain	Pathogenic
g.43093276A>T	c.T2255A	p.L752X	stopgain	Pathogenic
g.43093278_43093279del	c.2253_2254del	p.M751Ifs	frameshift deletion	Pathogenic
g.43093281_43093285del	c.2248_2252del	p.L750Vfs	frameshift deletion	Pathogenic
g.43093280_43093289del	c.2242_2251del	p.K748Cfs	frameshift deletion	Pathogenic
g.43093283_43093284insTC	c.2247_2248insGA	p.L750Dfs	frameshift insertion	Pathogenic
g.43093286_43093287dup	c.2246_2247insGA	p.D749Efs	frameshift insertion	Pathogenic
g.43093286del	c.2245delG	p.D749Ifs	frameshift deletion	Pathogenic
g.43093289dup	c.2244dupA	p.D749Rfs	frameshift insertion	Pathogenic
g.43093293dup	c.2241dupC	p.K748Qfs	frameshift insertion	Pathogenic
g.43093293del	c.2241delC	p.D749Ifs	frameshift deletion	Pathogenic
g.43093295dup	c.2236dupG	p.D746Gfs	frameshift insertion	Pathogenic
g.43093297dup	c.2235dupA	p.D746Rfs	frameshift insertion	Likely_pathogenic
g.43093304del	c.2228delA	p.N743Mfs	frameshift deletion	Pathogenic
g.43093305_43093306del	c.2226_2227del	p.N742Kfs	frameshift deletion	Pathogenic
g.43093308dup	c.2223dupT	p.N742fs	stopgain	Pathogenic
g.43093309_43093310del	c.2222_2223del	p.S741fs	stopgain	Pathogenic
g.43093311_43093377dup	c.2221_2222insAAAGAATTTGTCAATCCTAGCCTTCCAAGAGAAGAAAAAGAAGAGAAACTAGAAACAGTTAAAGTGT	p.S741fs	stopgain	Pathogenic
g.43093313del	c.2218delG	p.V740Cfs	frameshift deletion	Pathogenic
g.43093316dup	c.2217dupA	p.V740Sfs	frameshift insertion	Pathogenic
g.43093315_43093316del	c.2216_2217del	p.K739Sfs	frameshift deletion	Pathogenic
g.43093313_43093317delinsTTT	c.2214_2218AAA	p.K739Nfs	frameshift substitution	Pathogenic
g.43093314_43093315insAG	c.2216_2217insCT	p.K739Nfs	stopgain	Pathogenic
g.43093315_43093316insAG	c.2215_2216insCT	p.K739Tfs	frameshift insertion	Pathogenic
g.43093317_43093320del	c.2212_2215del	p.V738Kfs	frameshift deletion	Pathogenic
g.43093316T>A	c.A2215T	p.K739X	stopgain	Pathogenic
g.43093318dup	c.2214dupT	p.K739fs	stopgain	Pathogenic
g.43093317_43093318dup	c.2214_2215insTT	p.K739Lfs	frameshift insertion	Pathogenic
g.43093318del	c.2214delT	p.V740Cfs	frameshift deletion	Pathogenic
g.43093319_43093320del	c.2211_2212del	p.V738fs	frameshift deletion	Pathogenic
g.43093320dup	c.2211dupA	p.V738Sfs	frameshift insertion	Pathogenic
g.43093321_43093322del	c.2210_2211del	p.T737Sfs	frameshift deletion	Pathogenic
g.43093321del	c.2210delC	p.T737Kfs	frameshift deletion	Pathogenic
g.43093324del	c.2209delA	p.T737Qfs	frameshift deletion	Pathogenic
g.43093325del	c.2206delG	p.E736Kfs	frameshift deletion	Pathogenic
g.43093326del	c.2205delA	p.E736Kfs	frameshift deletion	Pathogenic
g.43093328del	c.2203delC	p.L735fs	stopgain	Pathogenic
g.43093331dup	c.2202dupA	p.L735Tfs	frameshift insertion	Pathogenic
g.43093331del	c.2202delA	p.K734Nfs	frameshift deletion	Pathogenic
g.43093334_43093338del	c.2197_2201del	p.E733Tfs	frameshift deletion	Pathogenic
g.43093337_43093350del	c.2188_2201del	p.E730Tfs	frameshift deletion	Pathogenic
g.43093332del	c.2199delG	p.K734Nfs	frameshift deletion	Pathogenic
g.43093333dup	c.2198dupA	p.K734Efs	frameshift insertion	Pathogenic
g.43093334C>A	c.G2197T	p.E733X	stopgain	Pathogenic
g.43093336del	c.2196delA	p.E733Rfs	frameshift deletion	Pathogenic
g.43093337_43093340del	c.2193_2196del	p.E732Rfs	frameshift deletion	Pathogenic
g.43093337_43093341del	c.2192_2196del	p.K731Rfs	frameshift deletion	Pathogenic
g.43093335_43093336delinsC	c.2195_2196G	p.E732Gfs	frameshift substitution	Pathogenic
g.43093336_43093343delinsCCTTTTT	c.2188_2195AAAAAGG	p.E730Kfs	frameshift substitution	Pathogenic
g.43093337C>A	c.G2194T	p.E732X	stopgain	Pathogenic
g.43093337delinsTT	c.2194delinsAA	p.E732Kfs	frameshift substitution	Pathogenic
g.43093342del	c.2193delA	p.E732Kfs	frameshift deletion	Pathogenic
g.43093346_43093350del	c.2185_2189del	p.E729Kfs	frameshift deletion	Pathogenic
g.43093343dup	c.2188dupG	p.E730Gfs	frameshift insertion	Pathogenic
g.43093343C>A	c.G2188T	p.E730X	stopgain	Pathogenic
g.43093346del	c.2185delG	p.E729Kfs	frameshift deletion	Pathogenic
g.43093346C>A	c.G2185T	p.E729X	stopgain	Pathogenic
g.43093354_43093355del	c.2176_2177del	p.L726Sfs	frameshift deletion	Pathogenic
g.43093356del	c.2176delC	p.L726Ffs	frameshift deletion	Pathogenic
g.43093357del	c.2174delG	p.S725Tfs	frameshift deletion	Pathogenic
g.43093360_43093460del	c.2071_2171del	p.R691fs	frameshift deletion	Pathogenic
g.43093363_43093376del	c.2155_2168del	p.K719Sfs	frameshift deletion	Pathogenic
g.43093365del	c.2166delC	p.N723Ifs	frameshift deletion	Pathogenic
g.43093367del	c.2164delG	p.V722Sfs	frameshift deletion	Pathogenic
g.43093368_43093375dup	c.2163_2164insAAGAATTT	p.V722Kfs	frameshift insertion	Pathogenic
g.43093369_43093370del	c.2162_2163del	p.F721Cfs	frameshift deletion	Pathogenic
g.43093368_43093369insC	c.2162_2163insG	p.F721Lfs	frameshift insertion	Pathogenic
g.43093369_43093370insC	c.2161_2162insG	p.F721Cfs	frameshift insertion	Pathogenic
g.43093372del	c.2160delA	p.E720Dfs	frameshift deletion	Pathogenic
g.43093373_43093376del	c.2157_2160del	p.K719Nfs	frameshift deletion	Pathogenic
g.43093373_43093374del	c.2158_2159del	p.E720Ifs	frameshift deletion	Pathogenic
g.43093373C>A	c.G2158T	p.E720X	stopgain	Pathogenic
g.43093376dup	c.2157dupA	p.E720Rfs	frameshift insertion	Pathogenic
g.43093376T>A	c.A2155T	p.K719X	stopgain	Pathogenic
g.43093376_43093388delinsAAAGA	c.2143_2155TCTTT	p.T715Sfs	frameshift substitution	Pathogenic
g.43093379_43093382del	c.2149_2152del	p.E717Lfs	frameshift deletion	Pathogenic
g.43093382C>A	c.G2149T	p.E717X	stopgain	Pathogenic
g.43093387del	c.2145delC	p.S716Vfs	frameshift deletion	Pathogenic
g.43093387_43093391del	c.2140_2144del	p.N714Qfs	frameshift deletion	Pathogenic
g.43093387_43093389delinsCT	c.2142_2144AG	p.N714Kfs	frameshift substitution	Pathogenic
g.43093389del	c.2142delT	p.N714Kfs	frameshift deletion	Pathogenic
g.43093392_43093393dup	c.2139_2140insCA	p.N714Qfs	frameshift insertion	Pathogenic
g.43093393G>C	c.C2138G	p.S713X	stopgain	Pathogenic
g.43093393G>T	c.C2138A	p.S713X	stopgain	Pathogenic
g.43093395_43093396AC	c.2135_2136del	p.C712Ffs	frameshift deletion	Pathogenic
g.43093399_43093400del	c.2131_2132del	p.K711Vfs	frameshift deletion	Pathogenic
g.43093401_43093420dup	c.2131_2132insTGCACCTGGTTCTTTTACTA	p.K711Mfs	frameshift insertion	Pathogenic
g.43093401delinsTT	c.2130delinsAA	p.C712Vfs	frameshift substitution	Pathogenic
g.43093403dup	c.2128dupA	p.T710Nfs	frameshift insertion	Pathogenic
g.43093403_43093404insCT	c.2128_2129insGA	p.T710Rfs	frameshift insertion	Pathogenic
g.43093403_43093404insTC	c.2127_2128insGA	p.T710Efs	frameshift insertion	Pathogenic
g.43093407del	c.2127delT	p.F709Lfs	frameshift deletion	Pathogenic
g.43093406_43093407del	c.2126_2127del	p.F709fs	frameshift deletion	Pathogenic
g.43093404_43093405insT	c.2126_2127insA	p.F709Lfs	frameshift insertion	Pathogenic
g.43093406_43093407insCTA	c.2125_2126insAGT	p.F709_Y1863del	stopgain	Pathogenic
g.43093405_43093406insT	c.2125_2126insA	p.F709Yfs	frameshift insertion	Pathogenic
g.43093412del	c.2120delG	p.G707Vfs	frameshift deletion	Pathogenic
g.43093419_43093420del	c.2111_2112del	p.N704Sfs	frameshift deletion	Pathogenic
g.43093421_43093422del	c.2110_2111del	p.N704Cfs	frameshift deletion	Pathogenic
g.43093427dup	c.2105dupT	p.L702Ffs	frameshift insertion	Pathogenic
g.43093427del	c.2105delT	p.L702fs	stopgain	Pathogenic
g.43093426A>C	c.T2105G	p.L702X	stopgain	Pathogenic
g.43093429_43093430del	c.2101_2102del	p.K701Vfs	frameshift deletion	Pathogenic
g.43093430T>A	c.A2101T	p.K701X	stopgain	Pathogenic
g.43093431_43093432insT	c.2099_2100insA	p.K701Efs	frameshift insertion	Pathogenic
g.43093432_43093433insT	c.2098_2099insA	p.L700Hfs	frameshift insertion	Pathogenic
g.43093436C>A	c.G2095T	p.E699X	stopgain	Pathogenic
g.43093443dup	c.2090dupT	p.E699Rfs	frameshift insertion	Pathogenic
g.43093443del	c.2090delT	p.F697Sfs	frameshift deletion	Pathogenic
g.43093443_43093446del	c.2086_2089del	p.T696Sfs	frameshift deletion	Pathogenic
g.43093445dup	c.2086dupA	p.T696Nfs	frameshift insertion	Pathogenic
g.43093445del	c.2086delA	p.T696Lfs	frameshift deletion	Pathogenic
g.43093448del	c.2083delG	p.D695Ifs	frameshift deletion	Pathogenic
g.43093451dup	c.2080dupA	p.S694Kfs	frameshift insertion	Pathogenic
g.43093452_43093453del	c.2079_2080del	p.D693Efs	frameshift deletion	Pathogenic
g.43093451_43093452insTA	c.2079_2080insTA	p.S694fs	stopgain	Pathogenic
g.43093453_43093454insAT	c.2078_2079insTA	p.S694Tfs	frameshift insertion	Pathogenic
g.43093453_43093454insTA	c.2077_2078insTA	p.D693Vfs	frameshift insertion	Pathogenic
g.43093454delinsTAT	c.2077delinsATA	p.D693Ifs	frameshift substitution	Pathogenic
g.43093455_43093456del	c.2075_2076del	p.H692Rfs	frameshift deletion	Pathogenic
g.43093457_43093458del	c.2074_2075del	p.H692fs	frameshift deletion	Pathogenic
g.43093457del	c.2074delC	p.H692Mfs	frameshift deletion	Pathogenic
g.43093463del	c.2071delA	p.R691Dfs	frameshift deletion	Pathogenic
g.43093462_43093463del	c.2070_2071del	p.R691Tfs	frameshift deletion	Pathogenic
g.43093464_43093467del	c.2066_2069del	p.S689Kfs	frameshift deletion	Pathogenic
g.43093463T>A	c.A2068T	p.K690X	stopgain	Pathogenic
g.43093465dup	c.2066dupG	p.S689Rfs	frameshift insertion	Pathogenic
g.43093465_43093468del	c.2063_2066del	p.T688Ifs	frameshift deletion	Pathogenic
g.43093470_43093473del	c.2061_2064del	p.T688Vfs	frameshift deletion	Pathogenic
g.43093471_43093474del	c.2057_2060del	p.E686Gfs	frameshift deletion	Pathogenic
g.43093472G>A	c.C2059T	p.Q687X	stopgain	Pathogenic
g.43093475C>A	c.G2056T	p.E686X	stopgain	Pathogenic
g.43093484del	c.2048delA	p.K683Sfs	frameshift deletion	Pathogenic
g.43093488dup	c.2043dupT	p.N682fs	stopgain	Pathogenic
g.43093491_43093492insGG	c.2039_2040insCC	p.K680Nfs	frameshift insertion	Pathogenic
g.43093492_43093493insGG	c.2038_2039insCC	p.K680Tfs	frameshift insertion	Pathogenic
g.43093493T>A	c.A2038T	p.K680X	stopgain	Pathogenic
g.43093493_43093494insG	c.2037_2038insC	p.K680Qfs	frameshift insertion	Pathogenic
g.43093494delinsGG	c.2037delinsCC	p.K679Nfs	frameshift substitution	Pathogenic
g.43093496T>A	c.A2035T	p.K679X	stopgain	Pathogenic
g.43093502_43093503del	c.2028_2029del	p.G677Sfs	frameshift deletion	Pathogenic
g.43093502C>A	c.G2029T	p.G677X	stopgain	Pathogenic
g.43093508_43093509dup	c.2023_2024insTG	p.A675Vfs	frameshift insertion	Pathogenic
g.43093511del	c.2021delC	p.P674Lfs	frameshift deletion	Pathogenic
g.43093513del	c.2019delA	p.E673Dfs	frameshift deletion	Pathogenic
g.43093514del	c.2017delG	p.E673Nfs	frameshift deletion	Pathogenic
g.43093514C>A	c.G2017T	p.E673X	stopgain	Pathogenic
g.43093517T>A	c.A2014T	p.K672X	stopgain	Pathogenic
g.43093518_43093519dup	c.2013_2014insGT	p.K672Vfs	frameshift insertion	Pathogenic
g.43093520dup	c.2012dupG	p.K672fs	frameshift insertion	Pathogenic
g.43093531dup	c.2001dupA	p.L668Tfs	frameshift insertion	Pathogenic
g.43093532G>A	c.C1999T	p.Q667X	stopgain	Pathogenic
g.43093536del	c.1996delC	p.L666Yfs	frameshift deletion	Pathogenic
g.43093539del	c.1994delA	p.N665Tfs	frameshift deletion	Pathogenic
g.43093553del	c.1978delG	p.V660Sfs	frameshift deletion	Pathogenic
g.43093553_43093554del	c.1977_1978del	p.V660Qfs	frameshift deletion	Pathogenic
g.43093561del	c.1972delA	p.M658Cfs	frameshift deletion	Pathogenic
g.43093562G>A	c.C1969T	p.Q657X	stopgain	Pathogenic
[truncated: 975 more rows]

## Sheet: BRCA2
Supplementary Table 2B. Human BRCA2 pathogenic variants (ClinVar)
Genome position	HGVS		Mutation Type	Variant impact
(hg38) NC_000013.11	cDNA (NM_000059)	Protein
g.32315358_32316294del	-		UTR5 variant	Pathogenic
g.32316421_32316422del	c.-39-1_-39del		splice site	Likely_pathogenic
g.32316420A>G	c.-39-2A>G		splice site	Pathogenic/Likely_pathogenic
g.32316421G>A	c.-39-1G>A		splice site	Pathogenic
g.32316456_32316471del	c.-5_11del	p.Met1fs	frameshift deletion	Pathogenic
g.32316461A>G	c.A1G	p.P2_M124del	startloss	Pathogenic
g.32316462T>A	c.T2A	p.P2_M124del	startloss	Pathogenic
g.32316462T>C	c.T2C	p.P2_M124del	startloss	Pathogenic/Likely_pathogenic
g.32316462T>G	c.T2G	p.P2_M124del	startloss	Pathogenic
g.32316463del	c.3delG	p.M1Ifs	startloss	Pathogenic
g.32316463G>A	c.G3A	p.P2_M124del	startloss	Pathogenic
g.32316463G>T	c.G3T	p.P2_M124del	startloss	Pathogenic
g.32316465del	c.4delC	p.P2Lfs	frameshift deletion	Pathogenic
g.32316467dup	c.7dupA	p.I3Nfs	frameshift insertion	Pathogenic
g.32316470G>T	c.G10T	p.G4X	stopgain	Pathogenic
g.32316475del	c.14delC	p.E7Rfs	frameshift deletion	Pathogenic
g.32316477_32316478del	c.16_17del	p.K6Rfs	frameshift deletion	Pathogenic
g.32316478_32316479AG	c.18_19del	p.R8Afs	frameshift deletion	Pathogenic
g.32316478_32316479AG	c.18_21del	p.E7Gfs	frameshift deletion	Pathogenic
g.32316486del	c.25delC	p.P9Qfs	frameshift deletion	Pathogenic
g.32316496dup	c.31dupT	p.E13fs	frameshift insertion	Pathogenic
g.32316496del	c.31delT	p.F12Lfs	frameshift deletion	Pathogenic
g.32316492_32316493delinsA	c.32_33A	p.F11Yfs	frameshift substitution	Pathogenic
g.32316497_32316504del	c.33_40del	p.E13fs	frameshift deletion	Pathogenic
g.32316497_32316498insT	c.37_38insT	p.E13Vfs	frameshift insertion	Pathogenic
g.32316497G>T	c.G37T	p.E13X	stopgain	Pathogenic
g.32316508dup	c.48dupG	p.T17Dfs	frameshift insertion	Pathogenic
g.32316508_32316510delinsATCGATCGAT	c.48_50ATCGATCGAT	p.T17Sfs	frameshift substitution	Pathogenic
g.32316509_32316510AC	c.49_50del	p.R18Lfs	frameshift deletion	Pathogenic
g.32316512_32316521del	c.49_58del	p.R18Kfs	frameshift deletion	Pathogenic
g.32316511dup	c.51dupA	p.R18Tfs	frameshift insertion	Pathogenic
g.32316518_32316519insGCTTGCAGTGAGCCGAGATCGCGCC	c.58_59insGCTTGCAGTGAGCCGAGATCGCGCC	p.N20Sfs	stopgain	Pathogenic
g.32316523del	c.61delA	p.A22Qfs	frameshift deletion	Pathogenic
g.32316528del	c.67delG	p.D23fs	frameshift deletion	Pathogenic
g.32316527G>T	c.G67T	p.D23Y	nonsynonymous SNV	Pathogenic
g.32316528G>A	c.67+1G>A		splice site	Pathogenic
g.32316528G>C	c.67+1G>C		splice site	Pathogenic/Likely_pathogenic
g.32316528G>T	c.67+1G>T		splice site	Pathogenic
g.32316529del	c.67+2T>-		splice site	Likely_pathogenic
g.32316529T>A	c.67+2T>A		splice site	Pathogenic
g.32316529T>C	c.67+2T>C		splice site	Pathogenic
g.32316529T>G	c.67+2T>G		splice site	Likely_pathogenic
g.32316530A>G	c.67+3A>G		intron variant	Likely_pathogenic
g.32317681_32321586del	c.68_316del	p.D23_L105del	nonframeshift deletion	Pathogenic
g.32319077_32319325del	c.68_313del	p.D23_L105delinsV	nonframeshift deletion	Pathogenic/Likely_pathogenic
g.32319076G>C	c.68-1G>C		splice site	Pathogenic
g.32319080del	c.69delT	p.L24fs	frameshift deletion	Pathogenic
g.32319080_32319105del	c.69_94del	p.L24fs	frameshift deletion	Pathogenic
g.32319080T>A	c.T71A	p.L24X	stopgain	Pathogenic
g.32319080T>G	c.T71G	p.L24X	stopgain	Pathogenic
g.32319081del	c.72delA	p.G25Dfs	frameshift deletion	Pathogenic
g.32319082G>T	c.G73T	p.G25X	stopgain	Pathogenic
g.32319088dup	c.78dupA	p.I27Nfs	frameshift insertion	Pathogenic
g.32319091_32319156del	c.81_146del	p.L29_S50del	nonframeshift deletion	Likely_pathogenic
g.32319090_32319092delinsTAAGACT	c.81_83TAAGACT	p.S28Kfs	frameshift substitution	Pathogenic
g.32319095_32319096del	c.86_87del	p.L29Qfs	frameshift deletion	Pathogenic
g.32319100del	c.90delT	p.W31Gfs	frameshift deletion	Pathogenic
g.32319101G>A	c.G92A	p.W31X	stopgain	Pathogenic
g.32319102G>A	c.G93A	p.W31X	stopgain	Pathogenic
g.32319106G>T	c.G97T	p.E33X	stopgain	Pathogenic
g.32319109G>T	c.G100T	p.E34X	stopgain	Pathogenic
g.32319112dup	c.103dupC	p.L35Pfs	frameshift insertion	Pathogenic
g.32319115_32319118del	c.103_106del	p.S36Qfs	frameshift deletion	Pathogenic
g.32319113_32319119del	c.103_109del	p.L35Qfs	frameshift deletion	Pathogenic
g.32319115dup	c.104dupT	p.S36Ffs	frameshift insertion	Pathogenic
g.32319118_32319121del	c.109_112del	p.S37Kfs	frameshift deletion	Pathogenic
g.32319119C>A	c.C110A	p.S37X	stopgain	Pathogenic
g.32319119C>G	c.C110G	p.S37X	stopgain	Pathogenic
g.32319124del	c.115delG	p.A39Lfs	frameshift deletion	Pathogenic
g.32319129_32319132del	c.118_121del	p.P41Ifs	frameshift deletion	Pathogenic
g.32319134_32319141dup	c.122_123insCTATAATT	p.E45Ifs	frameshift insertion	Pathogenic
g.32319135T>A	c.T126A	p.Y42X	stopgain	Pathogenic
g.32319137del	c.127delA	p.N43Ifs	frameshift deletion	Pathogenic
g.32319136_32319137del	c.127_128del	p.N43Ffs	frameshift deletion	Pathogenic
g.32319142G>T	c.G133T	p.E45X	stopgain	Pathogenic
g.32319146del	c.136delC	p.P46Lfs	frameshift deletion	Pathogenic
g.32319153del	c.143delA	p.E49Nfs	frameshift deletion	Pathogenic
g.32319154G>T	c.G145T	p.E49X	stopgain	Pathogenic
g.32319160del	c.151delG	p.E51Nfs	frameshift deletion	Pathogenic
g.32319165del	c.156delT	p.H52Qfs	frameshift deletion	Pathogenic
g.32319170dup	c.157dupA	p.N54Kfs	frameshift insertion	Pathogenic
g.32319165_32319166insGCCGGGCGCGGTCGCTCACGCCTGTAATCCCAGCACTTTGGGAGGCCGAGGCGGGCGGATCACGAGGTCAGGAGATCGACACCATCCCGGCTGAAACGGTGAAACCCCGTCTCTACTAAAAATACAAAAAATTAGCCGGGCGTAGTGGCGGGCGCCTGTAGTCCCAGCTACTTGGGAGGCTGAGGCAGGAGAATGGCGTGAACCCGGGAGGCGGAGCTTGCAGTGAGCCGAGATCCCGCCACTGCACTCCAGCCTGGGCGACAGAGCGAGACTCCGCCTCA	c.156_157insGCCGGGCGCGGTCGCTCACGCCTGTAATCCCAGCACTTTGGGAGGCCGAGGCGGGCGGATCACGAGGTCAGGAGATCGACACCATCCCGGCTGAAACGGTGAAACCCCGTCTCTACTAAAAATACAAAAAATTAGCCGGGCGTAGTGGCGGGCGCCTGTAGTCCCAGCTACTTGGGAGGCTGAGGCAGGAGAATGGCGTGAACCCGGGAGGCGGAGCTTGCAGTGAGCCGAGATCCCGCCACTGCACTCCAGCCTGGGCGACAGAGCGAGACTCCGCCTCA	p.K53Afs	stopgain	Pathogenic
g.32319170del	c.157delA	p.N54Tfs	frameshift deletion	Pathogenic
g.32319169_32319170del	c.157_158del	p.N54Qfs	frameshift deletion	Pathogenic
g.32319171del	c.162delC	p.N54Kfs	frameshift deletion	Pathogenic
g.32319176del	c.166delA	p.N56Ifs	frameshift deletion	Pathogenic
g.32319180_32319196del	c.168_184del	p.Y57fs	frameshift deletion	Pathogenic
g.32319179dup	c.170dupA	p.Y57fs	stopgain	Pathogenic
g.32319180del	c.171delC	p.Y57fs	stopgain	Pathogenic
g.32319180C>A	c.C171A	p.Y57X	stopgain	Pathogenic
g.32319180C>G	c.C171G	p.Y57X	stopgain	Pathogenic
g.32319181G>T	c.G172T	p.E58X	stopgain	Pathogenic
g.32319185del	c.175delC	p.P59Qfs	frameshift deletion	Pathogenic
g.32319195del	c.184delT	p.F62Lfs	frameshift deletion	Pathogenic
g.32319203del	c.193delC	p.P65Hfs	frameshift deletion	Pathogenic
g.32319205C>T	c.C196T	p.Q66X	stopgain	Pathogenic
g.32319210_32319228del	c.199_217del	p.R67Sfs	frameshift deletion	Pathogenic
g.32319210_32319211dup	c.200_201insGA	p.K68Rfs	frameshift insertion	Pathogenic
g.32319213dup	c.202dupA	p.P69Tfs	frameshift insertion	Pathogenic
g.32319213del	c.202delA	p.K68Nfs	frameshift deletion	Pathogenic
g.32319212_32319227del	c.202_217del	p.K68Sfs	frameshift deletion	Pathogenic
g.32319221dup	c.212dupA	p.Y71fs	stopgain	Pathogenic
g.32319224delinsTT	c.215delinsTT	p.N72Ifs	frameshift substitution	Pathogenic
g.32319226del	c.217delC	p.Q73Sfs	frameshift deletion	Pathogenic
g.32319226C>T	c.C217T	p.Q73X	stopgain	Pathogenic
g.32319230del	c.221delT	p.L74Rfs	frameshift deletion	Pathogenic
g.32319232_32319233insA	c.223_224insA	p.A75Dfs	frameshift insertion	Pathogenic
g.32319233_32319234insA	c.224_225insA	p.S76Ffs	frameshift insertion	Pathogenic
g.32319236C>G	c.C227G	p.S76X	stopgain	Pathogenic
g.32319240_32319261del	c.231_252del	p.P78Gfs	frameshift deletion	Pathogenic
g.32319255dup	c.244dupA	p.E83Rfs	frameshift insertion	Pathogenic
g.32319255del	c.244delA	p.E83Sfs	frameshift deletion	Pathogenic
g.32319253A>T	c.A244T	p.K82X	stopgain	Pathogenic
g.32319255_32319256AG	c.246_247del	p.E83Afs	frameshift deletion	Pathogenic
g.32319256G>T	c.G247T	p.E83X	stopgain	Pathogenic
g.32319259del	c.250delC	p.Q84Kfs	frameshift deletion	Pathogenic
g.32319259C>T	c.C250T	p.Q84X	stopgain	Pathogenic
g.32319269_32319270CT	c.260_261del	p.L88Afs	frameshift deletion	Pathogenic
g.32319272del	c.263delT	p.L88Rfs	frameshift deletion	Pathogenic
g.32319275del	c.265delC	p.P89Rfs	frameshift deletion	Pathogenic
g.32319276_32319277del	c.266_267del	p.L90Vfs	frameshift deletion	Pathogenic
g.32319279_32319282dup	c.269_270insGTAC	p.Q92Vfs	frameshift insertion	Pathogenic
g.32319280_32319281del	c.271_272del	p.Y91Pfs	frameshift deletion	Pathogenic
g.32319283del	c.273delC	p.Q92Nfs	frameshift deletion	Pathogenic
g.32319282C>A	c.C273A	p.Y91X	stopgain	Pathogenic
g.32319282C>G	c.C273G	p.Y91X	stopgain	Pathogenic
g.32319285dup	c.275dupA	p.S93Ifs	frameshift insertion	Pathogenic
g.32319283C>T	c.C274T	p.Q92X	stopgain	Pathogenic
g.32319284_32319285insCCAT	c.275_276insCCAT	p.Q92Hfs	frameshift insertion	Pathogenic
g.32319298G>T	c.G289T	p.E97X	stopgain	Pathogenic
g.32319302T>G	c.T293G	p.L98X	stopgain	Pathogenic
g.32319307A>T	c.A298T	p.K100X	stopgain	Pathogenic
g.32319315dup	c.304dupA	p.L103Ifs	frameshift insertion	Pathogenic
g.32319317dup	c.307dupT	p.L103Ffs	frameshift insertion	Pathogenic/Likely_pathogenic
g.32319317del	c.307delT	p.L103fs	stopgain	Pathogenic
g.32319323del	c.313delT	p.L105fs	stopgain	Pathogenic
g.32319323T>A	c.T314A	p.L105X	stopgain	Pathogenic
g.32319323T>G	c.T314G	p.L105X	stopgain	Pathogenic
g.32319326G>A	c.316+1G>A		splice site	Pathogenic/Likely_pathogenic
g.32319326G>C	c.316+1G>C		splice site	Pathogenic
g.32319326G>T	c.316+1G>T		splice site	Pathogenic
g.32319327T>C	c.316+2T>C		splice site	Pathogenic
g.32319327T>G	c.316+2T>G		splice site	Pathogenic
g.32319329del	c.316+4del		intron variant	Pathogenic
g.32319330G>A	c.316+5G>A		intron variant	Pathogenic
g.32319330G>C	c.316+5G>C		intron variant	Pathogenic
g.32325074A>G	c.317-2A>G		splice site	Likely_pathogenic
g.32325096A>T	c.A337T	p.R113X	stopgain	Pathogenic
g.32325101_32325102del	c.341_342del	p.H114Qfs	frameshift deletion	Pathogenic
g.32325101dup	c.342dupT	p.K115fs	stopgain	Pathogenic
g.32325108_32325109del	c.348_349del	p.L117Sfs	frameshift deletion	Pathogenic
g.32325110_32325111del	c.351_352del	p.R118Hfs	frameshift deletion	Pathogenic
g.32325123del	c.361delA	p.T122Lfs	frameshift deletion	Pathogenic
g.32325129del	c.367delA	p.M124Wfs	frameshift deletion	Pathogenic
g.32325126_32325129del	c.367_370del	p.K123Wfs	frameshift deletion	Pathogenic
g.32325127_32325131del	c.368_372del	p.K123Rfs	frameshift deletion	Pathogenic
g.32325129_32325133del	c.369_373del	p.M124Sfs	frameshift deletion	Pathogenic
g.32325128_32325130delinsTA	c.369_371TA	p.K123Nfs	frameshift substitution	Pathogenic
g.32325137dup	c.377dupA	p.A127Sfs	frameshift insertion	Pathogenic
g.32325135C>T	c.C376T	p.Q126X	stopgain	Likely_pathogenic
g.32325145del	c.386delA	p.D129Vfs	frameshift deletion	Pathogenic
g.32325150del	c.389delT	p.S131Pfs	frameshift deletion	Pathogenic
g.32325155T>A	c.T396A	p.C132X	stopgain	Pathogenic
g.32325162_32325169dup	c.402_403insCTAAATTC	p.C138fs	frameshift insertion	Pathogenic/Likely_pathogenic
g.32325166del	c.405delA	p.N136Ifs	frameshift deletion	Pathogenic
g.32325172_32325176del	c.409_413del	p.C138fs	frameshift deletion	Pathogenic
g.32325169del	c.410delC	p.S137Ffs	frameshift deletion	Pathogenic
g.32325173T>A	c.T414A	p.C138X	stopgain	Pathogenic
g.32325178del	c.419delG	p.S140Mfs	frameshift deletion	Pathogenic
g.32325184G>T	c.G425T	p.S142I	nonsynonymous SNV	Likely_pathogenic
g.32325185G>A	c.425+1G>A		splice site	Pathogenic/Likely_pathogenic
g.32325186T>C	c.425+2T>C		splice site	Likely_pathogenic
g.32326095_32326113del	c.426_436del	p.P143Tfs	frameshift deletion	Pathogenic
g.32326099A>G	c.426-2A>G		splice site	Pathogenic/Likely_pathogenic
g.32326099A>T	c.426-2A>T		splice site	Pathogenic
g.32326100G>A	c.426-1G>A		splice site	Likely_pathogenic
g.32326103dup	c.427dupC	p.V144Cfs	frameshift insertion	Pathogenic
g.32326103del	c.427delC	p.P143Lfs	frameshift deletion	Pathogenic
g.32326104del	c.429delT	p.V144Lfs	frameshift deletion	Pathogenic
g.32326108_32326112del	c.432_436del	p.V145Tfs	frameshift deletion	Pathogenic
g.32326110_32326119del	c.432_441del	p.L146Hfs	frameshift deletion	Pathogenic
g.32326113del	c.438delA	p.Q147Nfs	frameshift deletion	Pathogenic
g.32326114C>T	c.C439T	p.Q147X	stopgain	Pathogenic
g.32326116del	c.440delA	p.Q147Hfs	frameshift deletion	Pathogenic
g.32326126_32326127dup	c.449_450insTG	p.T152fs	frameshift insertion	Pathogenic
g.32326127dup	c.452dupT	p.T152Nfs	frameshift insertion	Likely_pathogenic
g.32326137_32326138del	c.461_462del	p.D156fs	frameshift deletion	Pathogenic
g.32326139_32326140GA	c.463_464del	p.D156fs	frameshift deletion	Pathogenic
g.32326139_32326143del	c.464_468del	p.R155Kfs	frameshift deletion	Pathogenic
g.32326140_32326141insT	c.465_466insT	p.D156fs	stopgain	Pathogenic
g.32326143dup	c.468dupT	p.K157fs	stopgain	Pathogenic
g.32326145dup	c.469dupA	p.S158Vfs	frameshift insertion	Pathogenic
g.32326145del	c.469delA	p.K157Sfs	frameshift deletion	Pathogenic
g.32326144_32326145del	c.469_470del	p.K157Vfs	frameshift deletion	Pathogenic
g.32326145_32326149del	c.469_473del	p.K157Sfs	frameshift deletion	Pathogenic
g.32326144_32326145insT	c.469_470insT	p.K157Ifs	frameshift insertion	Pathogenic
g.32326144A>T	c.A469T	p.K157X	stopgain	Likely_pathogenic
g.32326146del	c.471delG	p.K157Nfs	frameshift deletion	Pathogenic
g.32326146_32326147insA	c.471_472insA	p.S158Ifs	frameshift insertion	Pathogenic
g.32326148C>A	c.C473A	p.S158X	stopgain	Pathogenic
g.32326148C>G	c.C473G	p.S158X	stopgain	Pathogenic
g.32326150G>A	c.G475A	p.V159M	nonsynonymous SNV	Pathogenic/Likely_pathogenic
g.32326151G>A	c.475+1G>A		splice site	Pathogenic
g.32326151G>T	c.475+1G>T		splice site	Pathogenic
g.32326152T>A	c.475+2T>A		splice site	Likely_pathogenic
g.32326152T>C	c.475+2T>C		splice site	Likely_pathogenic
g.32326153A>T	c.475+3A>T		intron variant	Pathogenic
g.32326238_32326241del	c.476-4_476-1del		splice site	Pathogenic
g.32326238_32326241delinsT	c.476-4_476-1delinsT		splice site	Likely_pathogenic
g.32326240A>C	c.476-2A>C		splice site	Pathogenic/Likely_pathogenic
g.32326240A>G	c.476-2A>G		splice site	Pathogenic
g.32326241G>A	c.476-1G>A		splice site	Likely_pathogenic
g.32326241G>C	c.476-1G>C		splice site	Likely_pathogenic
g.32326252del	c.484delG	p.S163Vfs	frameshift deletion	Pathogenic
g.32326254dup	c.488dupG	p.S163Rfs	frameshift insertion	Pathogenic
g.32326254_32326255del	c.488_489del	p.S163Ifs	frameshift deletion	Pathogenic
g.32326255_32326256insG	c.489_490insG	p.L164Vfs	frameshift insertion	Pathogenic
g.32326257T>A	c.T491A	p.L164X	stopgain	Pathogenic
g.32326261del	c.493delT	p.H166Ifs	frameshift deletion	Pathogenic
g.32326272del	c.504delA	p.K169Sfs	frameshift deletion	Pathogenic
g.32326278dup	c.512dupT	p.K172Efs	frameshift insertion	Pathogenic
g.32326281_32326282insC	c.515_516insC	p.K172Nfs	frameshift insertion	Pathogenic
g.32326283del	c.516delG	p.G173Vfs	frameshift deletion	Pathogenic
g.32326283G>A	c.516+1G>A		splice site	Pathogenic
g.32326283G>C	c.516+1G>C		splice site	Pathogenic
g.32326283G>T	c.516+1G>T		splice site	Pathogenic
g.32326284T>A	c.516+2T>A		splice site	Pathogenic
g.32326284T>C	c.516+2T>C		splice site	Pathogenic
g.32326284T>G	c.516+2T>G		splice site	Pathogenic
g.32326497A>G	c.517-2A>G		splice site	Pathogenic
g.32326497A>T	c.517-2A>T		splice site	Likely_pathogenic
g.32326500del	c.517-1G>-		splice site	Pathogenic
g.32326498G>A	c.517-1G>A		splice site	Pathogenic
g.32326498G>T	c.517-1G>T		splice site	Pathogenic
g.32326500_32327075del	c.518_631del	p.G173_I210del	nonframeshift deletion	Likely_pathogenic
g.32326504del	c.522delT	p.Q175Rfs	frameshift deletion	Pathogenic
g.32326505C>T	c.C523T	p.Q175X	stopgain	Pathogenic
g.32326509_32326512del	c.527_530del	p.T176Kfs	frameshift deletion	Pathogenic
g.32326516del	c.531delA	p.K178Nfs	frameshift deletion	Likely_pathogenic
g.32326515_32326521delinsGAC	c.533_539GAC	p.K178Rfs	frameshift substitution	Pathogenic
g.32326518_32326519AT	c.535_536insAT	p.S181Ffs	frameshift insertion	Pathogenic
g.32326518_32326519AT	c.536_537del	p.I180Ffs	frameshift deletion	Pathogenic
g.32326519dup	c.537dupT	p.I180Yfs	frameshift insertion	Pathogenic
g.32326523del	c.539delT	p.S181Lfs	frameshift deletion	Pathogenic
g.32326526G>T	c.G544T	p.E182X	stopgain	Pathogenic
g.32326547dup	c.564dupG	p.D189Gfs	frameshift insertion	Pathogenic
g.32326550_32326557del	c.566_573del	p.P190Vfs	frameshift deletion	Pathogenic
g.32326548_32326549insG	c.566_567insG	p.D189Efs	frameshift insertion	Pathogenic
g.32326550_32326551insAACG	c.568_569insAACG	p.P190Qfs	frameshift insertion	Pathogenic
g.32326551_32326552insAACG	c.569_570insAACG	p.D191Tfs	frameshift insertion	Pathogenic
g.32326554_32326555AT	c.572_573del	p.M192Vfs	frameshift deletion	Pathogenic
g.32326554delinsCT	c.572delinsCT	p.D191Afs	frameshift substitution	Pathogenic
g.32326556dup	c.574dupA	p.M192Nfs	frameshift insertion	Pathogenic
g.32326563G>A	c.G581A	p.W194X	stopgain	Pathogenic
g.32326564G>A	c.G582A	p.W194X	stopgain	Pathogenic
g.32326565del	c.583delT	p.S195Qfs	frameshift deletion	Pathogenic
g.32326566C>G	c.C584G	p.S195X	stopgain	Pathogenic
g.32326577_32326580del	c.593_596del	p.A199Hfs	frameshift deletion	Pathogenic
g.32326576_32326580dup	c.593_594insAGCTA	p.T200Kfs	frameshift insertion	Pathogenic
g.32326575_32326578delinsAGG	c.593_596AGG	p.L198fs	stopgain	Pathogenic
g.32326577_32326581dup	c.594_595insGCTAC	p.P201Lfs	frameshift insertion	Pathogenic
g.32326585del	c.603delA	p.T203Pfs	frameshift deletion	Pathogenic
g.32326592dup	c.608dupC	p.L204Pfs	frameshift insertion	Pathogenic/Likely_pathogenic
g.32326592del	c.608delC	p.S205Vfs	frameshift deletion	Pathogenic
g.32326592_32326595dup	c.609_610insCTTA	p.S205Tfs	frameshift insertion	Pathogenic
g.32326594_32326595insTGAG	c.612_613insTGAG	p.S205fs	stopgain	Pathogenic
g.32326595_32326596del	c.613_614del	p.S205Ffs	frameshift deletion	Pathogenic
g.32326595_32326596insTGAG	c.613_614insTGAG	p.S205Mfs	frameshift insertion	Pathogenic
g.32326596del	c.614delG	p.S205Ifs	frameshift deletion	Pathogenic
g.32326613G>A	c.G631A	p.V211I	nonsynonymous SNV	Pathogenic
g.32326613G>C	c.G631C	p.V211L	nonsynonymous SNV	Pathogenic/Likely_pathogenic
g.32326614G>A	c.631+1G>A		splice site	Pathogenic/Likely_pathogenic
g.32326614G>C	c.631+1G>C		splice site	Pathogenic
g.32326615T>A	c.631+2T>A		splice site	Pathogenic/Likely_pathogenic
g.32326615T>G	c.631+2T>G		splice site	Pathogenic
g.32326617A>G	c.631+4A>G		intron variant	Pathogenic/Likely_pathogenic
g.32329440C>G	c.632-3C>G		intron variant	Pathogenic
g.32329441del	c.632-2A>-		splice site	Pathogenic
g.32329442dup	c.632-2->G		splice site	Likely_pathogenic
g.32329441A>C	c.632-2A>C		splice site	Pathogenic/Likely_pathogenic
g.32329441A>G	c.632-2A>G		splice site	Pathogenic
g.32329442G>A	c.632-1G>A		splice site	Pathogenic
g.32329442G>C	c.632-1G>C		splice site	Pathogenic
g.32329442G>T	c.632-1G>T		splice site	Likely_pathogenic
g.32329446_32329447del	c.634_635del	p.R212Kfs	frameshift deletion	Pathogenic
g.32329450del	c.639delT	p.N213Kfs	frameshift deletion	Pathogenic
g.32329454G>T	c.G643T	p.E215X	stopgain	Pathogenic
g.32329463G>T	c.G652T	p.E218X	stopgain	Pathogenic
g.32329469_32329470del	c.657_658del	p.V220Ifs	frameshift deletion	Pathogenic
g.32329473_32329474del	c.661_662del	p.F221Sfs	frameshift deletion	Pathogenic
g.32329475_32329476del	c.664_665del	p.P222Sfs	frameshift deletion	Pathogenic
g.32329479del	c.668delA	p.H223Lfs	frameshift deletion	Pathogenic
g.32329481_32329484dup	c.669_670insGATA	p.T225Rfs	frameshift insertion	Pathogenic
g.32329483_32329515del	c.671_681del	p.D224Efs	frameshift deletion	Pathogenic
g.32329484_32329487del	c.673_676del	p.T225Lfs	frameshift deletion	Pathogenic
g.32329485del	c.674delC	p.T225Ifs	frameshift deletion	Pathogenic
g.32329488del	c.677delC	p.T226Mfs	frameshift deletion	Pathogenic
g.32329493G>A	c.681+1G>A		splice site	Likely_pathogenic
g.32329493G>T	c.681+1G>T		splice site	Likely_pathogenic
g.32330917A>C	c.682-2A>C		splice site	Pathogenic
g.32330917A>G	c.682-2A>G		splice site	Pathogenic
g.32330918G>C	c.682-1G>C		splice site	Pathogenic/Likely_pathogenic
g.32330918G>T	c.682-1G>T		splice site	Pathogenic
g.32330920del	c.682delA	p.N228Mfs	frameshift deletion	Likely_pathogenic
g.32330925A>T	c.A688T	p.K230X	stopgain	Pathogenic
g.32330929dup	c.692dupG	p.S231Rfs	frameshift insertion	Pathogenic
g.32330931dup	c.694dupT	p.Y232Lfs	frameshift insertion	Pathogenic
g.32330937del	c.696delT	p.S234Pfs	frameshift deletion	Pathogenic
g.32330939del	c.701delC	p.N235Ifs	frameshift deletion	Pathogenic
g.32330942del	c.705delT	p.H236Mfs	frameshift deletion	Pathogenic
g.32330944del	c.707delA	p.H236Lfs	frameshift deletion	Likely_pathogenic
g.32330949dup	c.712dupG	p.E238Gfs	frameshift insertion	Pathogenic
g.32330952dup	c.713dupA	p.S239Kfs	frameshift insertion	Pathogenic
g.32330949G>T	c.G712T	p.E238X	stopgain	Pathogenic
g.32330952del	c.713delA	p.S239Vfs	frameshift deletion	Pathogenic
g.32330955_32330956del	c.717_718del	p.L240Efs	frameshift deletion	Pathogenic/Likely_pathogenic
g.32330958A>T	c.A721T	p.K241X	stopgain	Pathogenic
g.32330960del	c.723delG	p.N243Mfs	frameshift deletion	Pathogenic
g.32330965dup	c.724dupA	p.N243Kfs	frameshift insertion	Pathogenic
g.32330960_32330961delinsCT	c.723_724CT	p.K241_I3418delinsN	stopgain	Pathogenic
g.32330965_32330966del	c.728_729del	p.N243Rfs	frameshift deletion	Pathogenic
g.32330965_32330966insC	c.728_729insC	p.D244fs	frameshift insertion	Pathogenic
g.32330966dup	c.729dupT	p.D244fs	stopgain	Pathogenic
g.32330966_32330969del	c.729_732del	p.N243Kfs	frameshift deletion	Pathogenic
g.32330966_32330967insC	c.729_730insC	p.D244Rfs	frameshift insertion	Pathogenic
g.32330969_32330970del	c.731_732del	p.D244Efs	frameshift deletion	Pathogenic
g.32330970del	c.733delA	p.R245Dfs	frameshift deletion	Pathogenic
g.32330973_32330992del	c.733_752del	p.F246Qfs	frameshift deletion	Pathogenic
g.32330970A>T	c.A733T	p.R245X	stopgain	Pathogenic
g.32330975del	c.736delT	p.F246Lfs	frameshift deletion	Pathogenic
g.32330976_32330977del	c.738_739del	p.I247Rfs	frameshift deletion	Pathogenic
g.32330976_32330977insAG	c.739_740insAG	p.I247Kfs	frameshift insertion	Pathogenic
g.32330977_32330978insAG	c.740_741insAG	p.S249Lfs	frameshift insertion	Pathogenic
g.32330980del	c.743delC	p.A248Vfs	frameshift deletion	Pathogenic
g.32330982_32330994del	c.745_757del	p.S249Vfs	frameshift deletion	Pathogenic
g.32330985del	c.748delG	p.V250fs	stopgain	Pathogenic
g.32330988_32330991ACAG	c.750_753del	p.D252Vfs	frameshift deletion	Pathogenic
g.32330991_32330992del	c.753_754del	p.D252Qfs	frameshift deletion	Pathogenic
g.32330992del	c.755delA	p.D252Afs	frameshift deletion	Pathogenic
g.32330993_32330994del	c.755_756del	p.D252Efs	frameshift deletion	Pathogenic
g.32330993_32330996del	c.756_759del	p.D252Efs	frameshift deletion	Pathogenic
g.32330994_32330995del	c.757_758del	p.S253fs	frameshift deletion	Pathogenic
g.32331001dup	c.761dupA	p.N255Kfs	frameshift insertion	Pathogenic/Likely_pathogenic
g.32331002_32331006del	c.763_767del	p.N255Kfs	frameshift deletion	Likely_pathogenic
g.32331002_32331003CA	c.764_765del	p.T256Kfs	frameshift deletion	Pathogenic
g.32331002_32331007delinsAAACAAT	c.765_770AAACAAT	p.N255Kfs	frameshift substitution	Pathogenic
g.32331004del	c.767delC	p.T256Kfs	frameshift deletion	Pathogenic
g.32331008_32331012del	c.767_771del	p.N257Kfs	frameshift deletion	Pathogenic
g.32331007del	c.768delA	p.N257Ifs	frameshift deletion	Pathogenic
g.32331009C>T	c.C772T	p.Q258X	stopgain	Pathogenic
g.32331012del	c.773delA	p.R259Efs	frameshift deletion	Pathogenic
g.32331011_32331012del	c.773_774del	p.E260Sfs	frameshift deletion	Pathogenic
g.32331011_32331014del	c.773_776del	p.R259Kfs	frameshift deletion	Pathogenic
g.32331013_32331014GA	c.775_776del	p.E260Sfs	frameshift deletion	Pathogenic
g.32331012A>T	c.A775T	p.R259X	stopgain	Pathogenic
g.32331024dup	c.786dupA	p.S263Kfs	frameshift insertion	Pathogenic
g.32331031G>A	c.793+1G>A		splice site	Pathogenic/Likely_pathogenic
g.32331031G>C	c.793+1G>C		splice site	Likely_pathogenic
g.32331031G>T	c.793+1G>T		splice site	Pathogenic/Likely_pathogenic
g.32331032T>G	c.793+2T>G		splice site	Pathogenic/Likely_pathogenic
g.32332270A>G	c.794-2A>G		splice site	Likely_pathogenic
g.32332276del	c.796delT	p.F266Lfs	frameshift deletion	Pathogenic
g.32332278dup	c.799dupG	p.T269Nfs	frameshift insertion	Pathogenic
g.32332277G>T	c.G799T	p.G267X	stopgain	Pathogenic
g.32332283dup	c.801dupA	p.T269Nfs	frameshift insertion	Pathogenic
g.32332284del	c.806delC	p.T269Nfs	frameshift deletion	Pathogenic
g.32332287C>G	c.C809G	p.S270X	stopgain	Pathogenic
g.32332291del	c.811delG	p.N272Ifs	frameshift deletion	Pathogenic
g.32332296C>A	c.C818A	p.S273X	stopgain	Pathogenic
g.32332296C>G	c.C818G	p.S273X	stopgain	Pathogenic
g.32332304_32332308del	c.822_826del	p.V276fs	frameshift deletion	Pathogenic
g.32332309dup	c.831dupT	p.S278fs	stopgain	Pathogenic
g.32332309del	c.831delT	p.N277Kfs	frameshift deletion	Pathogenic
g.32332311del	c.833delG	p.S278Tfs	frameshift deletion	Pathogenic
g.32332312del	c.834delC	p.C279Afs	frameshift deletion	Pathogenic
g.32332319_32332325del	c.840_846del	p.D281Lfs	frameshift deletion	Pathogenic
g.32332320_32332321del	c.842_843del	p.D281Afs	frameshift deletion	Pathogenic
g.32332322_32332323CA	c.844_845del	p.I283Wfs	frameshift deletion	Pathogenic
g.32332335_32332338dup	c.855_856insTCAA	p.M287Ifs	frameshift insertion	Pathogenic
g.32332335C>G	c.C857G	p.S286X	stopgain	Pathogenic
g.32332358G>T	c.G880T	p.E294X	stopgain	Pathogenic
g.32332362del	c.884delT	p.V295Dfs	frameshift deletion	Pathogenic
g.32332366T>A	c.T888A	p.Y296X	stopgain	Pathogenic
g.32332367G>T	c.G889T	p.E297X	stopgain	Pathogenic
g.32332369_32332377delinsGATACTTAG	c.891_899GATACTTAG	p.T298_V300delinsILR	nonframeshift substitution	Likely_pathogenic
g.32332369_32332377delinsGATACTTCAG	c.891_899GATACTTCAG	p.T298Ifs	frameshift substitution	Pathogenic
g.32332375dup	c.896dupT	p.V300Cfs	frameshift insertion	Pathogenic
g.32332374_32332375insC	c.896_897insC	p.V300Cfs	frameshift insertion	Pathogenic
g.32332375_32332376insC	c.897_898insC	p.V300Rfs	frameshift insertion	Pathogenic
g.32332376_32332378delinsTT	c.898_900TT	p.V300Lfs	frameshift substitution	Pathogenic
g.32332379dup	c.901dupG	p.D301Gfs	frameshift insertion	Pathogenic
g.32332382dup	c.904dupA	p.T302Nfs	frameshift insertion	Pathogenic
g.32332384del	c.905delC	p.S303Lfs	frameshift deletion	Pathogenic
g.32332383_32332384insA	c.905_906insA	p.S303Lfs	frameshift insertion	Pathogenic
g.32332388G>T	c.G910T	p.E304X	stopgain	Pathogenic
g.32332391G>T	c.G913T	p.E305X	stopgain	Pathogenic
g.32332395_32332398del	c.915_918del	p.D306Vfs	frameshift deletion	Pathogenic
g.32332396_32332397del	c.917_918del	p.D306Efs	frameshift deletion	Pathogenic
g.32332396dup	c.918dupT	p.S307fs	stopgain	Pathogenic
g.32332397_32332400dup	c.917_918insTAGT	p.F308fs	frameshift insertion	Pathogenic
g.32332397_32332398insT	c.919_920insT	p.S307Mfs	frameshift insertion	Pathogenic
g.32332403dup	c.921dupT	p.S309Ffs	frameshift insertion	Pathogenic
g.32332403del	c.921delT	p.S309Hfs	frameshift deletion	Pathogenic
g.32332404dup	c.926dupC	p.L310Ifs	frameshift insertion	Pathogenic
g.32332404C>A	c.C926A	p.S309X	stopgain	Pathogenic
g.32332404C>G	c.C926G	p.S309X	stopgain	Pathogenic
g.32332405del	c.927delA	p.L310Yfs	frameshift deletion	Pathogenic
g.32332408_32332409del	c.929_930del	p.C311Ffs	frameshift deletion	Pathogenic
g.32332418A>T	c.A940T	p.K314X	stopgain	Pathogenic
g.32332427del	c.948delA	p.T317Qfs	frameshift deletion	Pathogenic
g.32332434dup	c.951dupA	p.N319Kfs	frameshift insertion	Pathogenic
g.32332434del	c.951delA	p.N319Ifs	frameshift deletion	Pathogenic
g.32332430A>T	c.A952T	p.K318X	stopgain	Pathogenic
g.32332437del	c.959delT	p.L320Hfs	frameshift deletion	Pathogenic
g.32332439C>T	c.C961T	p.Q321X	stopgain	Pathogenic
g.32332441_32332444del	c.962_965del	p.K322fs	frameshift deletion	Pathogenic
g.32332446_32332449del	c.965_968del	p.V323Efs	frameshift deletion	Pathogenic
g.32332448_32332451del	c.969_972del	p.R324Lfs	frameshift deletion	Pathogenic
g.32332457A>T	c.A979T	p.K327X	stopgain	Pathogenic
g.32332472dup	c.988dupA	p.I332Nfs	frameshift insertion	Pathogenic
g.32332471_32332472dup	c.987_988insAA	p.I332Kfs	frameshift insertion	Pathogenic
g.32332472del	c.988delA	p.I332Ffs	frameshift deletion	Pathogenic
g.32332471_32332472del	c.988_989del	p.K331Nfs	frameshift deletion	Pathogenic
g.32332472_32332473insG	c.994_995insG	p.I332Sfs	frameshift insertion	Pathogenic
g.32332476dup	c.995dupT	p.H334Pfs	frameshift insertion	Pathogenic
g.32332473_32332474insA	c.995_996insA	p.H334Pfs	frameshift insertion	Pathogenic
g.32332473_32332474insG	c.995_996insG	p.I332Mfs	frameshift insertion	Pathogenic
g.32332488dup	c.1008dupA	p.N337Kfs	frameshift insertion	Pathogenic
g.32332499TG	c.1021_1022del	p.C341fs	frameshift deletion	Pathogenic
g.32332501T>A	c.T1023A	p.C341X	stopgain	Pathogenic
g.32332507dup	c.1025dupA	p.S344fs	frameshift insertion	Pathogenic
g.32332507del	c.1025delA	p.K343Nfs	frameshift deletion	Pathogenic
g.32332517C>T	c.C1039T	p.Q347X	stopgain	Pathogenic
g.32332519del	c.1040delA	p.V348fs	frameshift deletion	Pathogenic
g.32332531dup	c.1049dupA	p.Y352Ifs	frameshift insertion	Pathogenic
g.32332526G>T	c.G1048T	p.E350X	stopgain	Pathogenic
g.32332529A>T	c.A1051T	p.K351X	stopgain	Pathogenic
g.32332532dup	c.1054dupT	p.Y352Lfs	frameshift insertion	Pathogenic
g.32332533dup	c.1055dupA	p.Y352fs	stopgain	Pathogenic
g.32332535_32332536del	c.1056_1057del	p.S353Ifs	frameshift deletion	Pathogenic
g.32332535del	c.1057delT	p.S353Hfs	frameshift deletion	Pathogenic
g.32332536C>A	c.C1058A	p.S353X	stopgain	Pathogenic
g.32332536C>G	c.C1058G	p.S353X	stopgain	Pathogenic
g.32332537del	c.1059delA	p.F354Lfs	frameshift deletion	Pathogenic
g.32332540dup	c.1060dupT	p.V355Cfs	frameshift insertion	Likely_pathogenic
g.32332544del	c.1066delT	p.S356Lfs	frameshift deletion	Pathogenic
g.32332547del	c.1069delG	p.E357Kfs	frameshift deletion	Pathogenic
g.32332560del	c.1080delA	p.N361Mfs	frameshift deletion	Pathogenic
g.32332575dup	c.1096dupT	p.L366Ffs	frameshift insertion	Pathogenic
g.32332575T>A	c.T1097A	p.L366X	stopgain	Pathogenic
g.32332575T>G	c.T1097G	p.L366X	stopgain	Pathogenic
g.32332581C>A	c.C1103A	p.S368X	stopgain	Pathogenic
g.32332581C>G	c.C1103G	p.S368X	stopgain	Pathogenic
g.32332593del	c.1113delA	p.N372Ifs	frameshift deletion	Pathogenic
g.32332592_32332593delinsC	c.1114_1115C	p.N372Lfs	frameshift substitution	Pathogenic
g.32332592_32332595delinsCATT	c.1114_1117CATT	p.N372_I3418delinsH	stopgain	Pathogenic
g.32332595C>T	c.C1117T	p.Q373X	stopgain	Pathogenic
g.32332606del	c.1126delT	p.F376Lfs	frameshift deletion	Pathogenic
g.32332612del	c.1134delT	p.S378Rfs	frameshift deletion	Pathogenic
g.32332616del	c.1137delA	p.S380Vfs	frameshift deletion	Pathogenic
g.32332625del	c.1144delA	p.I383Sfs	frameshift deletion	Pathogenic
g.32332631A>T	c.A1153T	p.K385X	stopgain	Pathogenic
g.32332634del	c.1155delG	p.E386Kfs	frameshift deletion	Pathogenic
g.32332642_32332646del	c.1162_1166del	p.P389Ffs	frameshift deletion	Pathogenic
g.32332641_32332644dup	c.1162_1163insTACC	p.S390Tfs	frameshift insertion	Pathogenic
g.32332654_32332658del	c.1176_1180del	p.C393Mfs	frameshift deletion	Pathogenic
g.32332657T>A	c.T1179A	p.C393X	stopgain	Pathogenic
g.32332658G>T	c.G1180T	p.E394X	stopgain	Pathogenic
g.32332662G>A	c.G1184A	p.W395X	stopgain	Pathogenic
g.32332663G>A	c.G1185A	p.W395X	stopgain	Pathogenic
g.32332665_32332678del	c.1186_1199del	p.S396Ffs	frameshift deletion	Pathogenic
g.32332666_32332667insTTAT	c.1187_1188insTTTA	p.Q397Lfs	frameshift insertion	Pathogenic
g.32332667_32332670dup	c.1188_1189insCAAC	p.L398Pfs	frameshift insertion	Pathogenic
g.32332667_32332668insCAAC	c.1188_1189insCCAA	p.Q397Pfs	frameshift insertion	Pathogenic
g.32332666_32332667insTTAG	c.1188_1189insTTAG	p.Q397Lfs	frameshift insertion	Pathogenic
g.32332668_32332675del	c.1189_1196del	p.Q397Pfs	frameshift deletion	Pathogenic
g.32332667_32332668insTTAG	c.1189_1190insTTAG	p.Q397Lfs	frameshift insertion	Pathogenic
g.32332667_32332668insTTAT	c.1189_1190insTTAT	p.Q397Lfs	frameshift insertion	Pathogenic
g.32332667C>T	c.C1189T	p.Q397X	stopgain	Pathogenic
g.32332668_32332669insTTAG	c.1190_1191insTTAG	p.Q397Hfs	stopgain	Pathogenic
g.32332670del	c.1192delC	p.L398fs	stopgain	Pathogenic
g.32332673del	c.1194delA	p.T399Pfs	frameshift deletion	Pathogenic
g.32332680C>A	c.C1202A	p.S401X	stopgain	Pathogenic/Likely_pathogenic
g.32332680C>G	c.C1202G	p.S401X	stopgain	Pathogenic
g.32332683del	c.1204delG	p.G402Vfs	frameshift deletion	Pathogenic
g.32332689dup	c.1209dupA	p.N404Kfs	frameshift insertion	Pathogenic
g.32332690del	c.1212delT	p.N404Kfs	frameshift deletion	Pathogenic
g.32332697del	c.1217delC	p.Q407Rfs	frameshift deletion	Pathogenic
g.32332697C>T	c.C1219T	p.Q407X	stopgain	Pathogenic
g.32332703del	c.1224delG	p.E409Rfs	frameshift deletion	Pathogenic
g.32332703delinsTTT	c.1225delinsTTT	p.E409Ffs	frameshift substitution	Pathogenic
g.32332704del	c.1226delA	p.E409Gfs	frameshift deletion	Pathogenic
g.32332709del	c.1228delA	p.I411Yfs	frameshift deletion	Pathogenic
g.32332711dup	c.1233dupA	p.P412Tfs	frameshift insertion	Pathogenic
g.32332711del	c.1233delA	p.L413Yfs	frameshift deletion	Pathogenic/Likely_pathogenic
g.32332710_32332720delinsACAT	c.1232_1242ACAT	p.I411Nfs	frameshift substitution	Pathogenic
g.32332715del	c.1234delC	p.L413Yfs	frameshift deletion	Pathogenic
g.32332716del	c.1238delT	p.L413Hfs	frameshift deletion	Pathogenic
g.32332719T>A	c.T1241A	p.L414X	stopgain	Pathogenic
g.32332721_32332722insCAAT	c.1243_1244insCAAT	p.H415Pfs	frameshift insertion	Pathogenic
g.32332727del	c.1247delT	p.S417Lfs	frameshift deletion	Pathogenic
g.32332731C>A	c.C1253A	p.S418X	stopgain	Pathogenic
g.32332731C>G	c.C1253G	p.S418X	stopgain	Pathogenic
g.32332735del	c.1257delT	p.C419Wfs	frameshift deletion	Pathogenic
g.32332739C>T	c.C1261T	p.Q421X	stopgain	Pathogenic
g.32332743del	c.1262delA	p.N422Ifs	frameshift deletion	Pathogenic
g.32332749C>G	c.C1271G	p.S424X	stopgain	Pathogenic
g.32332751_32332752del	c.1272_1273del	p.E425Kfs	frameshift deletion	Pathogenic
g.32332756dup	c.1274dupA	p.D427Rfs	frameshift insertion	Pathogenic
g.32332756del	c.1274delA	p.D427Tfs	frameshift deletion	Pathogenic
g.32332763_32332764dup	c.1284_1285insTT	p.L429Ffs	frameshift insertion	Pathogenic
g.32332764T>G	c.T1286G	p.L429X	stopgain	Pathogenic
g.32332765dup	c.1287dupA	p.D430Rfs	frameshift insertion	Pathogenic
g.32332766del	c.1288delG	p.D430Tfs	frameshift deletion	Pathogenic
g.32332768_32332769CA	c.1289_1290del	p.T431Rfs	frameshift deletion	Pathogenic
g.32332772_32332773GA	c.1293_1294del	p.N433Qfs	frameshift deletion	Pathogenic
g.32332776dup	c.1297dupA	p.N433Kfs	frameshift insertion	Pathogenic
g.32332778_32332781del	c.1300_1303del	p.K434Efs	frameshift deletion	Pathogenic
g.32332781_32332785del	c.1300_1304del	p.R435Efs	frameshift deletion	Pathogenic
g.32332780_32332783AAGA	c.1301_1304del	p.K437Ifs	frameshift deletion	Pathogenic
g.32332785del	c.1305delA	p.K436Rfs	frameshift deletion	Pathogenic
g.32332784_32332785del	c.1305_1306del	p.K436Efs	frameshift deletion	Pathogenic
g.32332786_32332787del	c.1307_1308del	p.K437Rfs	frameshift deletion	Pathogenic
g.32332788_32332789del	c.1309_1310del	p.K437Rfs	frameshift deletion	Pathogenic
g.32332789_32332792del	c.1311_1314del	p.K437Nfs	frameshift deletion	Pathogenic
g.32332794_32332795dup	c.1313_1314insTT	p.L440Ffs	frameshift insertion	Pathogenic
g.32332795del	c.1314delT	p.T441Lfs	frameshift deletion	Pathogenic
g.32332796_32332797dup	c.1316_1317insTC	p.T441Lfs	frameshift insertion	Pathogenic
g.32332799_32332802del	c.1318_1321del	p.T441Qfs	frameshift deletion	Pathogenic
g.32332796_32332797insCT	c.1318_1319insCT	p.L440Pfs	frameshift insertion	Pathogenic
g.32332799dup	c.1321dupA	p.T441Nfs	frameshift insertion	Pathogenic
g.32332803C>A	c.C1325A	p.S442X	stopgain	Pathogenic
g.32332803C>G	c.C1325G	p.S442X	stopgain	Pathogenic
g.32332805G>T	c.G1327T	p.E443X	stopgain	Pathogenic
g.32332807del	c.1329delG	p.N444Ifs	frameshift deletion	Pathogenic
g.32332811dup	c.1332dupT	p.S445Ffs	frameshift insertion	Pathogenic
g.32332810_32332811del	c.1332_1333del	p.S445Ffs	frameshift deletion	Pathogenic
g.32332812del	c.1334delC	p.S445Ffs	frameshift deletion	Pathogenic
g.32332813_32332816del	c.1335_1338del	p.L446Hfs	frameshift deletion	Pathogenic
g.32332815T>A	c.T1337A	p.L446X	stopgain	Pathogenic
g.32332820del	c.1342delC	p.R448Vfs	frameshift deletion	Pathogenic
g.32332840dup	c.1359dupA	p.S455Ifs	frameshift insertion	Pathogenic
g.32332840del	c.1359delA	p.K454Nfs	frameshift deletion	Pathogenic
g.32332844_32332845GA	c.1364_1365insAG	p.K457Rfs	frameshift insertion	Pathogenic
g.32332842C>G	c.C1364G	p.S455X	stopgain	Pathogenic
g.32332844_32332845GA	c.1365_1366del	p.K457Afs	frameshift deletion	Pathogenic
g.32332844G>T	c.G1366T	p.E456X	stopgain	Pathogenic
g.32332848del	c.1369delA	p.K457Sfs	frameshift deletion	Pathogenic
g.32332854del	c.1375delT	p.L459fs	stopgain	Pathogenic
g.32332854T>G	c.T1376G	p.L459X	stopgain	Pathogenic
g.32332857del	c.1377delA	p.N460Mfs	frameshift deletion	Pathogenic
g.32332859G>T	c.G1381T	p.E461X	stopgain	Pathogenic
g.32332862G>T	c.G1384T	p.E462X	stopgain	Pathogenic
g.32332865del	c.1385delA	p.T463Qfs	frameshift deletion	Pathogenic
g.32332867del	c.1389delA	p.V464Wfs	frameshift deletion	Pathogenic
g.32332867_32332868del	c.1389_1390del	p.V464Gfs	frameshift deletion	Pathogenic
g.32332869dup	c.1391dupT	p.V465Gfs	frameshift insertion	Pathogenic
g.32332871del	c.1392delG	p.V465fs	frameshift deletion	Pathogenic
g.32332877_32332880del	c.1399_1402del	p.K467Efs	frameshift deletion	Pathogenic
g.32332882_32332891del	c.1399_1408del	p.R468Sfs	frameshift deletion	Pathogenic
g.32332877A>T	c.A1399T	p.K467X	stopgain	Pathogenic
g.32332879_32332880GA	c.1400_1401del	p.D469fs	frameshift deletion	Pathogenic
g.32332880A>T	c.A1402T	p.R468X	stopgain	Pathogenic
g.32332886dup	c.1408dupG	p.E470Gfs	frameshift insertion	Pathogenic
g.32332889G>T	c.G1411T	p.E471X	stopgain	Pathogenic
g.32332892C>T	c.C1414T	p.Q472X	stopgain	Pathogenic
g.32332901G>T	c.G1423T	p.E475X	stopgain	Pathogenic
g.32332906_32332909del	c.1428_1431del	p.H477Qfs	frameshift deletion	Pathogenic
g.32332907del	c.1429delC	p.H477Ifs	frameshift deletion	Pathogenic
g.32332911_32332912del	c.1432_1433del	p.T478Rfs	frameshift deletion	Pathogenic
g.32332911del	c.1433delC	p.T478Kfs	frameshift deletion	Pathogenic
g.32332918C>A	c.C1440A	p.C480X	stopgain	Pathogenic
g.32332922del	c.1444delC	p.A483Qfs	frameshift deletion	Pathogenic
g.32332925dup	c.1447dupG	p.A483Gfs	frameshift insertion	Pathogenic
g.32332926_32332929dup	c.1447_1448insCAGT	p.K485Sfs	frameshift insertion	Pathogenic
g.32332927_32332929delinsTTAC	c.1449_1451TTAC	p.V484Yfs	frameshift substitution	Pathogenic
g.32332927_32332929delinsTTCC	c.1449_1451TTCC	p.V484Sfs	frameshift substitution	Pathogenic
g.32332932del	c.1452delA	p.K485Sfs	frameshift deletion	Pathogenic
g.32332932delinsTGTATT	c.1454delinsTGTATT	p.K485Mfs	frameshift substitution	Pathogenic
g.32332934C>T	c.C1456T	p.Q486X	stopgain	Pathogenic
g.32332935del	c.1457delA	p.Q486Rfs	frameshift deletion	Pathogenic
g.32332943del	c.1465delT	p.S489Lfs	frameshift deletion	Pathogenic
g.32332945_32332946del	c.1467_1468del	p.G490Nfs	frameshift deletion	Pathogenic
g.32332956del	c.1477delC	p.P493Qfs	frameshift deletion	Likely_pathogenic
g.32332960_32332964del	c.1481_1485del	p.A495Ffs	frameshift deletion	Pathogenic
g.32332962dup	c.1484dupC	p.S496Ffs	frameshift insertion	Pathogenic
g.32332968C>G	c.C1490G	p.S497X	stopgain	Pathogenic
g.32332973C>T	c.C1495T	p.Q499X	stopgain	Likely_pathogenic
g.32332974_32332975del	c.1496_1497del	p.Q499Rfs	frameshift deletion	Pathogenic
g.32332977del	c.1497delG	p.G500Vfs	frameshift deletion	Pathogenic
g.32332982_32332989del	c.1502_1509del	p.K502Yfs	frameshift deletion	Pathogenic
g.32332986del	c.1504delA	p.K503Sfs	frameshift deletion	Pathogenic
g.32332985_32332986del	c.1504_1505del	p.K503Vfs	frameshift deletion	Pathogenic
g.32332989_32332990del	c.1510_1511del	p.S504Yfs	frameshift deletion	Pathogenic
g.32332989del	c.1511delC	p.S504Lfs	frameshift deletion	Pathogenic
g.32332992del	c.1514delT	p.I505Nfs	frameshift deletion	Pathogenic
g.32333004_32333005GA	c.1525_1526del	p.E510Ifs	frameshift deletion	Pathogenic
g.32333006G>T	c.G1528T	p.E510X	stopgain	Pathogenic
g.32333010C>A	c.C1532A	p.S511X	stopgain	Pathogenic
g.32333014_32333015dup	c.1535_1536insTA	p.K513Ifs	frameshift insertion	Pathogenic
g.32333017del	c.1537delA	p.E514Rfs	frameshift deletion	Pathogenic
g.32333016_32333019del	c.1537_1540del	p.K513Rfs	frameshift deletion	Pathogenic
g.32333018dup	c.1540dupG	p.E514Gfs	frameshift insertion	Pathogenic
g.32333020dup	c.1542dupG	p.T515Dfs	frameshift insertion	Pathogenic
g.32333025del	c.1545delT	p.F516Sfs	frameshift deletion	Pathogenic
g.32333026del	c.1548delC	p.F516Lfs	frameshift deletion	Pathogenic
g.32333028del	c.1549delA	p.N517Mfs	frameshift deletion	Pathogenic
g.32333030del	c.1552delG	p.A518Qfs	frameshift deletion	Pathogenic
g.32333039dup	c.1557dupT	p.S521Ffs	frameshift insertion	Pathogenic
g.32333038_32333039del	c.1557_1558del	p.S521Rfs	frameshift deletion	Pathogenic
g.32333046_32333047AT	c.1567_1568insAT	p.M524fs	frameshift insertion	Pathogenic
g.32333046_32333047AT	c.1568_1569del	p.M524Dfs	frameshift deletion	Pathogenic
g.32333050del	c.1572delG	p.M524Ifs	frameshift deletion	Pathogenic
g.32333050_32333051insCC	c.1572_1573insCC	p.T525Pfs	frameshift insertion	Pathogenic
g.32333062_32333063insA	c.1584_1585insA	p.F529fs	frameshift insertion	Pathogenic
g.32333063_32333064insA	c.1585_1586insA	p.F529Yfs	frameshift insertion	Pathogenic
g.32333065_32333068del	c.1587_1590del	p.F529Lfs	frameshift deletion	Pathogenic
g.32333065delinsCA	c.1587delinsCA	p.E532Rfs	frameshift substitution	Pathogenic
g.32333071dup	c.1588dupA	p.E532Rfs	frameshift insertion	Pathogenic
g.32333071del	c.1588delA	p.E532Kfs	frameshift deletion	Pathogenic
g.32333066A>T	c.A1588T	p.K530X	stopgain	Pathogenic
g.32333072_32333073del	c.1593_1594del	p.E532Nfs	frameshift deletion	Pathogenic
g.32333072G>T	c.G1594T	p.E532X	stopgain	Pathogenic
g.32333075del	c.1595delA	p.T533Lfs	frameshift deletion	Pathogenic
g.32333074_32333075del	c.1595_1596del	p.E532Dfs	frameshift deletion	Pathogenic
g.32333073_32333077del	c.1595_1599del	p.E532Gfs	frameshift deletion	Pathogenic
g.32333077_32333078del	c.1599_1600del	p.E534Sfs	frameshift deletion	Pathogenic
g.32333086dup	c.1608dupT	p.E537fs	stopgain	Pathogenic
g.32333086_32333087del	c.1608_1609del	p.E537Kfs	frameshift deletion	Pathogenic
g.32333090_32333091del	c.1612_1613del	p.S538Wfs	frameshift deletion	Pathogenic
g.32333095del	c.1617delA	p.L540Wfs	frameshift deletion	Pathogenic
g.32333099G>T	c.G1621T	p.E541X	stopgain	Pathogenic
g.32333106_32333133delinsTTATGTCCAAATTTAATTGATAATGTCCAAATTTAATTGATAATGGAAGTA	c.1628_1655TTATGTCCAAATTTAATTGATAATGTCCAAATTTAATTGATAATGGAAGTA	p.H543Lfs	stopgain	Pathogenic
g.32333109_32333110del	c.1631_1632del	p.T544Sfs	frameshift deletion	Pathogenic
g.32333114del	c.1634delT	p.C546Afs	frameshift deletion	Pathogenic
g.32333120C>T	c.C1642T	p.Q548X	stopgain	Pathogenic
g.32333124_32333127del	c.1644_1647del	p.K549Rfs	frameshift deletion	Pathogenic
g.32333126dup	c.1647dupG	p.E550Gfs	frameshift insertion	Pathogenic
g.32333126G>T	c.G1648T	p.E550X	stopgain	Likely_pathogenic
g.32333132del	c.1654delT	p.S552Pfs	frameshift deletion	Pathogenic
g.32333136T>G	c.T1658G	p.L553X	stopgain	Pathogenic
g.32333145del	c.1665delA	p.N556fs	frameshift deletion	Pathogenic
g.32333146_32333149delinsATT	c.1668_1671ATT	p.N556Kfs	frameshift substitution	Pathogenic
g.32333149_32333152del	c.1669_1672del	p.D559Mfs	frameshift deletion	Pathogenic
g.32333152_32333158del	c.1670_1676del	p.I558Mfs	frameshift deletion	Pathogenic
g.32333148_32333161del	c.1670_1683del	p.L557fs	stopgain	Pathogenic
g.32333148T>G	c.T1670G	p.L557X	stopgain	Pathogenic
g.32333150del	c.1671delA	p.I558Lfs	frameshift deletion	Pathogenic
g.32333151_32333155del	c.1673_1677del	p.I558Kfs	frameshift deletion	Pathogenic
g.32333153del	c.1675delG	p.D559Ifs	frameshift deletion	Pathogenic
g.32333159G>T	c.G1681T	p.G561X	stopgain	Pathogenic
g.32333167del	c.1688delG	p.W563Cfs	frameshift deletion	Pathogenic
g.32333167_32333170GCCA	c.1689_1692del	p.A565Pfs	frameshift deletion	Pathogenic
g.32333167G>A	c.G1689A	p.W563X	stopgain	Pathogenic
g.32333174del	c.1696delA	p.T566Pfs	frameshift deletion	Pathogenic
g.32333179_32333180CA	c.1701_1702del	p.Q569Efs	frameshift deletion	Pathogenic
g.32333181_32333182insG	c.1703_1704insG	p.Q569Tfs	frameshift insertion	Pathogenic
g.32333182_32333183insG	c.1704_1705insG	p.Q569Afs	frameshift insertion	Pathogenic
g.32333183del	c.1705delC	p.Q569Rfs	frameshift deletion	Pathogenic
g.32333185_32333186del	c.1706_1707del	p.N570Ffs	frameshift deletion	Pathogenic
g.32333189_32333193del	c.1710_1714del	p.V572Ffs	frameshift deletion	Pathogenic
g.32333211del	c.1732delG	p.G578Vfs	frameshift deletion	Pathogenic
g.32333214T>G	c.T1736G	p.L579X	stopgain	Pathogenic
g.32333217_32333232del	c.1737_1752del	p.I580Rfs	frameshift deletion	Pathogenic
g.32333226del	c.1746delT	p.L583fs	frameshift deletion	Pathogenic
g.32333226T>A	c.T1748A	p.L583X	stopgain	Pathogenic
g.32333232dup	c.1750dupA	p.K586Efs	frameshift insertion	Pathogenic
g.32333232del	c.1750delA	p.K585Rfs	frameshift deletion	Pathogenic
g.32333233_32333237del	c.1751_1755del	p.K585Nfs	frameshift deletion	Pathogenic
g.32333231A>T	c.A1753T	p.K585X	stopgain	Pathogenic/Likely_pathogenic
g.32333236_32333237del	c.1756_1757del	p.K586Nfs	frameshift deletion	Pathogenic
g.32333234A>T	c.A1756T	p.K586X	stopgain	Pathogenic
g.32333238del	c.1760delC	p.T587Kfs	frameshift deletion	Pathogenic
g.32333241_32333244del	c.1761_1764del	p.N588Sfs	frameshift deletion	Pathogenic
g.32333240_32333244del	c.1761_1765del	p.N588Vfs	frameshift deletion	Pathogenic
g.32333243_32333244del	c.1765_1766del	p.K589Vfs	frameshift deletion	Pathogenic
g.32333244_32333247del	c.1766_1769del	p.K589Ifs	frameshift deletion	Pathogenic
g.32333245_32333248del	c.1767_1770del	p.I591Mfs	frameshift deletion	Pathogenic
g.32333247_32333250TTAT	c.1768_1771del	p.I591Mfs	frameshift deletion	Pathogenic
g.32333252del	c.1772delT	p.Y592Mfs	frameshift deletion	Pathogenic
g.32333252_32333255del	c.1774_1777del	p.Y592Lfs	frameshift deletion	Pathogenic
g.32333264_32333273del	c.1782_1791del	p.D596Lfs	frameshift deletion	Pathogenic
g.32333263_32333281del	c.1784_1802del	p.H595Qfs	frameshift deletion	Pathogenic
g.32333265_32333277del	c.1787_1799del	p.D596Vfs	frameshift deletion	Pathogenic
g.32333270dup	c.1790dupA	p.T598Nfs	frameshift insertion	Pathogenic
g.32333267G>T	c.G1789T	p.E597X	stopgain	Pathogenic
g.32333270del	c.1790delA	p.T598Hfs	frameshift deletion	Pathogenic
g.32333272_32333275dup	c.1793_1794insATCT	p.Y600Ifs	frameshift insertion	Pathogenic
g.32333274_32333278del	c.1794_1798del	p.S599fs	frameshift deletion	Pathogenic
g.32333275_32333279del	c.1797_1801del	p.Y600Rfs	frameshift deletion	Pathogenic
g.32333276_32333277TA	c.1798_1799del	p.Y600fs	frameshift deletion	Pathogenic
g.32333276_32333280del	c.1798_1802del	p.Y600Rfs	frameshift deletion	Pathogenic
g.32333278T>A	c.T1800A	p.Y600X	stopgain	Pathogenic
g.32333278T>G	c.T1800G	p.Y600X	stopgain	Pathogenic
g.32333283del	c.1804delG	p.G602Efs	frameshift deletion	Pathogenic
g.32333282G>T	c.G1804T	p.G602X	stopgain	Pathogenic
g.32333291dup	c.1806dupA	p.I605Nfs	frameshift insertion	Pathogenic
g.32333291del	c.1806delA	p.I605Yfs	frameshift deletion	Pathogenic
g.32333289_32333290delinsG	c.1811_1812G	p.K604Rfs	frameshift substitution	Pathogenic
g.32333290_32333291insC	c.1812_1813insC	p.I605Hfs	frameshift insertion	Pathogenic
g.32333293dup	c.1815dupA	p.P606Tfs	frameshift insertion	Pathogenic
g.32333295_32333297delinsTTT	c.1817_1819TTT	p.P606_I3418delinsL	stopgain	Pathogenic
g.32333299dup	c.1819dupA	p.D608Rfs	frameshift insertion	Pathogenic
g.32333297A>T	c.A1819T	p.K607X	stopgain	Pathogenic
g.32333303C>T	c.C1825T	p.Q609X	stopgain	Pathogenic
g.32333309del	c.1831delT	p.S611Qfs	frameshift deletion	Pathogenic
g.32333309_32333320delinsATCAG	c.1831_1842ATCAG	p.S611Ifs	frameshift substitution	Pathogenic
g.32333310C>A	c.C1832A	p.S611X	stopgain	Pathogenic
g.32333310C>G	c.C1832G	p.S611X	stopgain	Pathogenic
g.32333311del	c.1833delA	p.E612Nfs	frameshift deletion	Pathogenic
g.32333319_32333322del	c.1838_1841del	p.I614Tfs	frameshift deletion	Pathogenic
g.32333318dup	c.1839dupA	p.I614Nfs	frameshift insertion	Pathogenic
g.32333320dup	c.1841dupT	p.N615fs	frameshift insertion	Pathogenic
g.32333319_32333320dup	c.1840_1841insTT	p.N615Lfs	frameshift insertion	Likely_pathogenic
g.32333322del	c.1843delA	p.N615Tfs	frameshift deletion	Pathogenic
g.32333323_32333324del	c.1845_1846del	p.N615Kfs	frameshift deletion	Pathogenic
g.32333324del	c.1846delT	p.C616Vfs	frameshift deletion	Pathogenic/Likely_pathogenic
g.32333328C>A	c.C1850A	p.S617X	stopgain	Pathogenic
g.32333329dup	c.1851dupA	p.A618Sfs	frameshift insertion	Pathogenic
g.32333328C>G	c.C1850G	p.S617X	stopgain	Pathogenic
g.32333333dup	c.1853dupC	p.Q619Pfs	frameshift insertion	Pathogenic
g.32333333del	c.1853delC	p.Q619Sfs	frameshift deletion	Pathogenic
g.32333331_32333332insA	c.1853_1854insA	p.Q619Pfs	frameshift insertion	Pathogenic
g.32333332delinsAA	c.1854delinsAA	p.Q619Tfs	frameshift substitution	Pathogenic
g.32333332_32333333insA	c.1854_1855insA	p.Q619Tfs	frameshift insertion	Pathogenic
g.32333333C>T	c.C1855T	p.Q619X	stopgain	Pathogenic
g.32333342_32333343delinsTA	c.1864_1865TA	p.A622_I3418del	stopgain	Pathogenic
g.32333359del	c.1881delA	p.P628Hfs	frameshift deletion	Pathogenic
g.32333365_32333371del	c.1886_1892del	p.T630Qfs	frameshift deletion	Pathogenic
g.32333366dup	c.1888dupA	p.T630Nfs	frameshift insertion	Pathogenic
g.32333366_32333367insAA	c.1887_1888insAA	p.T630Kfs	frameshift insertion	Pathogenic
g.32333367_32333368dup	c.1887_1888insAC	p.F631Hfs	frameshift insertion	Pathogenic
g.32333366_32333367insGA	c.1887_1888insAG	p.T630Rfs	frameshift insertion	Pathogenic
g.32333366del	c.1888delA	p.T630Hfs	frameshift deletion	Pathogenic
g.32333367del	c.1889delC	p.T630Nfs	frameshift deletion	Pathogenic
g.32333367_32333368delinsGGG	c.1889_1890GGG	p.T630Rfs	frameshift substitution	Pathogenic
g.32333377_32333378insTT	c.1898_1899insTT	p.A634Lfs	frameshift insertion	Pathogenic
g.32333378_32333379insTT	c.1900_1901insTT	p.A634Vfs	frameshift insertion	Pathogenic
g.32333379del	c.1901delC	p.A634Vfs	frameshift deletion	Pathogenic
g.32333384del	c.1905delT	p.S636Qfs	frameshift deletion	Pathogenic
g.32333383_32333387del	c.1905_1909del	p.D635Efs	frameshift deletion	Pathogenic
g.32333385C>G	c.C1907G	p.S636X	stopgain	Pathogenic
g.32333388G>A	c.1909+1G>A		splice site	Pathogenic/Likely_pathogenic
g.32333389T>A	c.1909+2T>A		splice site	Likely_pathogenic
g.32336264_32336269del	c.1910-1_1914del		splice site	Likely_pathogenic
g.32336263A>T	c.1910-2A>T		splice site	Likely_pathogenic
g.32336264G>T	c.1910-1G>T		splice site	Pathogenic/Likely_pathogenic
g.32336268T>G	c.T1913G	p.L638X	stopgain	Pathogenic
g.32336277_32336278insAT	c.1922_1923insAT	p.S642Ffs	frameshift insertion	Pathogenic
g.32336278_32336279insAT	c.1922_1923insTA	p.S642Ifs	frameshift insertion	Pathogenic
g.32336280del	c.1925delC	p.S642Lfs	frameshift deletion	Pathogenic
g.32336284del	c.1929delG	p.R645Efs	frameshift deletion	Pathogenic
g.32336288del	c.1930delA	p.R645Efs	frameshift deletion	Pathogenic
g.32336295_32336298delinsTTTA	c.1940_1943TTTA	p.C647_I3418delinsF	stopgain	Pathogenic
g.32336298del	c.1943delC	p.S648Yfs	frameshift deletion	Pathogenic
g.32336298C>G	c.C1943G	p.S648X	stopgain	Pathogenic
g.32336300C>T	c.C1945T	p.Q649X	stopgain	Pathogenic
g.32336312_32336321del	c.1957_1966del	p.E653Lfs	frameshift deletion	Pathogenic
g.32336313_32336319delinsTG	c.1958_1964TG	p.E653Vfs	frameshift substitution	Pathogenic
g.32336315G>T	c.G1960T	p.E654X	stopgain	Pathogenic
g.32336319del	c.1963delC	p.P655Qfs	frameshift deletion	Pathogenic
g.32336325T>A	c.T1970A	p.L657X	stopgain	Pathogenic
g.32336336_32336339dup	c.1978_1979insCTAG	p.S662fs	frameshift insertion	Pathogenic
g.32336337del	c.1982delG	p.S661Tfs	frameshift deletion	Pathogenic
g.32336344del	c.1986delT	p.F663Lfs	frameshift deletion	Pathogenic
g.32336347del	c.1990delG	p.T665Qfs	frameshift deletion	Pathogenic
g.32336375G>T	c.G2020T	p.E674X	stopgain	Pathogenic
g.32336378del	c.2021delA	p.T675Hfs	frameshift deletion	Pathogenic
g.32336380del	c.2025delA	p.C676Vfs	frameshift deletion	Pathogenic
g.32336380_32336381del	c.2025_2026del	p.C676Ffs	frameshift deletion	Pathogenic
g.32336381del	c.2026delT	p.C676Vfs	frameshift deletion	Pathogenic
g.32336389_32336393del	c.2033_2037del	p.N679Sfs	frameshift deletion	Pathogenic
g.32336391del	c.2035delA	p.N679Ifs	frameshift deletion	Pathogenic
g.32336400del	c.2045delT	p.I682Tfs	frameshift deletion	Pathogenic
g.32336400_32336401TC	c.2045_2046del	p.Q684Gfs	frameshift deletion	Pathogenic
g.32336400_32336401TC	c.2045_2048del	p.S683Rfs	frameshift deletion	Pathogenic
g.32336414_32336418del	c.2059_2063del	p.D687fs	frameshift deletion	Pathogenic
g.32336419T>G	c.T2064G	p.Y688X	stopgain	Pathogenic
g.32336440_32336444del	c.2083_2087del	p.E696Tfs	frameshift deletion	Pathogenic
g.32336446dup	c.2087dupA	p.L698Tfs	frameshift insertion	Pathogenic
g.32336441G>T	c.G2086T	p.E696X	stopgain	Pathogenic
g.32336446del	c.2087delA	p.K697Nfs	frameshift deletion	Pathogenic
g.32336447del	c.2092delC	p.L698Yfs	frameshift deletion	Pathogenic
g.32336449del	c.2094delA	p.Q699Sfs	frameshift deletion	Pathogenic
g.32336450_32336451del	c.2094_2095del	p.Q699Vfs	frameshift deletion	Pathogenic
g.32336450C>T	c.C2095T	p.Q699X	stopgain	Pathogenic
g.32336454_32336457TATT	c.2098_2101del	p.F701Lfs	frameshift deletion	Pathogenic
g.32336453_32336472delinsGCA	c.2098_2117GCA	p.L700Afs	frameshift substitution	Pathogenic
g.32336454T>A	c.T2099A	p.L700X	stopgain	Pathogenic
g.32336461del	c.2105delT	p.T703Pfs	frameshift deletion	Likely_pathogenic
g.32336460_32336461del	c.2105_2106del	p.I702Nfs	frameshift deletion	Pathogenic
g.32336466del	c.2108delC	p.P704Qfs	frameshift deletion	Pathogenic
g.32336477del	c.2121delT	p.S708Lfs	frameshift deletion	Pathogenic
g.32336478_32336479CT	c.2122_2123del	p.L709Vfs	frameshift deletion	Pathogenic
g.32336484C>G	c.C2129G	p.S710X	stopgain	Pathogenic
g.32336488C>A	c.C2133A	p.C711X	stopgain	Pathogenic
g.32336492C>T	c.C2137T	p.Q713X	stopgain	Pathogenic
g.32336502dup	c.2147dupA	p.C717Vfs	frameshift insertion	Pathogenic
g.32336502del	c.2147delA	p.Q716Rfs	frameshift deletion	Pathogenic
g.32336504_32336505TG	c.2148_2149del	p.C717fs	frameshift deletion	Pathogenic
g.32336505del	c.2150delG	p.C717Lfs	frameshift deletion	Pathogenic
g.32336506T>A	c.T2151A	p.C717X	stopgain	Pathogenic
g.32336511_32336514del	c.2155_2158del	p.N719Ifs	frameshift deletion	Pathogenic
g.32336515delinsCAGGAA	c.2160delinsCAGGAA	p.P721Rfs	frameshift substitution	Pathogenic
g.32336522_32336523del	c.2167_2168del	p.S723Qfs	frameshift deletion	Likely_pathogenic
g.32336522_32336524delinsCT	c.2167_2169CT	p.S723Lfs	frameshift substitution	Likely_pathogenic
g.32336530dup	c.2170dupA	p.V726Sfs	frameshift insertion	Pathogenic
g.32336524_32336525insT	c.2169_2170insT	p.K724fs	stopgain	Likely_pathogenic
g.32336530del	c.2170delA	p.V726Ffs	frameshift deletion	Pathogenic
g.32336531del	c.2176delG	p.V726Ffs	frameshift deletion	Pathogenic/Likely_pathogenic
g.32336547_32336551del	c.2190_2194del	p.E731Gfs	frameshift deletion	Pathogenic
g.32336552del	c.2196delG	p.V733Sfs	frameshift deletion	Pathogenic
g.32336552_32336553insAAAAGAAGAGGGCCGGGCGCGGTGGCTCACGCCTGTAATCCCAGCACTTTGGGAGGCCGAGGCGGGTGGATCATGAGGTCAGGAGATCGAGACCATCCTGGCTANNNNNNNNNNNNNNNNNNNNAAAAAAAAAAAAAAAAAAAAAAAAAAAAAAAAAA	c.2197_2198insAAAAGAAGAGGGCCGGGCGCGGTGGCTCACGCCTGTAATCCCAGCACTTTGGGAGGCCGAGGCGGGTGGATCATGAGGTCAGGAGATCGAGACCATCCTGGCTANNNNNNNNNNNNNNNNNNNNAAAAAAAAAAAAAAAAAAAAAAAAAAAAAAAAAA			Pathogenic
g.32336556_32336557insAA	c.2201_2202insAA	p.A735Rfs	frameshift insertion	Pathogenic
g.32336557_32336558insAA	c.2202_2203insAA	p.A735Kfs	frameshift insertion	Pathogenic
g.32336560del	c.2205delT	p.A736Qfs	frameshift deletion	Pathogenic
g.32336561del	c.2206delG	p.A736Qfs	frameshift deletion	Pathogenic
g.32336564_32336571del	c.2207_2214del	p.A737Pfs	frameshift deletion	Pathogenic
g.32336563del	c.2208delA	p.A737Hfs	frameshift deletion	Pathogenic
g.32336567dup	c.2212dupT	p.C738Lfs	frameshift insertion	Pathogenic
g.32336569T>A	c.T2214A	p.C738X	stopgain	Pathogenic
g.32336579C>T	c.C2224T	p.Q742X	stopgain	Pathogenic
g.32336581del	c.2225delA	p.Q742Hfs	frameshift deletion	Pathogenic
g.32336586C>A	c.C2231A	p.S744X	stopgain	Pathogenic
g.32336586C>G	c.C2231G	p.S744X	stopgain	Pathogenic
g.32336590del	c.2232delA	p.V746Wfs	frameshift deletion	Pathogenic
g.32336594G>T	c.G2239T	p.E747X	stopgain	Pathogenic
g.32336599_32336600del	c.2243_2244del	p.Y748fs	stopgain	Pathogenic
g.32336600_32336601insTTCAAAAGTGGAATTCAAAA	c.2244_2245insATTCAAAAGTGGAATTCAAA	p.S749Ifs	frameshift insertion	Pathogenic
g.32336599_32336600insTTCAAAAGTGGAATTCAAAA	c.2244_2245insTTCAAAAGTGGAATTCAAAA	p.S749Ffs	frameshift insertion	Pathogenic
g.32336599C>G	c.C2244G	p.Y748X	stopgain	Pathogenic
g.32336606dup	c.2251dupA	p.T751Nfs	frameshift insertion	Pathogenic
g.32336609_32336612del	c.2251_2254del	p.D752Ffs	frameshift deletion	Pathogenic
g.32336608_32336609del	c.2253_2254del	p.D752Lfs	frameshift deletion	Pathogenic
g.32336610dup	c.2255dupA	p.D752Efs	frameshift insertion	Pathogenic
g.32336611del	c.2256delC	p.Q754Nfs	frameshift deletion	Pathogenic
g.32336614del	c.2257delT	p.Q754Nfs	frameshift deletion	Pathogenic
g.32336616_32336619del	c.2259_2262del	p.Q754Pfs	frameshift deletion	Pathogenic
g.32336621dup	c.2264dupC	p.Q756Pfs	frameshift insertion	Pathogenic
g.32336621C>T	c.C2266T	p.Q756X	stopgain	Pathogenic
g.32336627del	c.2269delA	p.S758Vfs	frameshift deletion	Pathogenic
g.32336626_32336627del	c.2269_2270del	p.L759Ffs	frameshift deletion	Pathogenic
g.32336624A>T	c.A2269T	p.K757X	stopgain	Pathogenic
g.32336628del	c.2273delG	p.S758Ifs	frameshift deletion	Pathogenic
g.32336634del	c.2276delT	p.L760Yfs	frameshift deletion	Pathogenic
g.32336633_32336634del	c.2276_2277del	p.L760fs	frameshift deletion	Pathogenic
g.32336634_32336638del	c.2278_2282del	p.L760fs	frameshift deletion	Pathogenic
g.32336635_32336636AT	c.2279_2280del	p.Y761fs	frameshift deletion	Pathogenic
g.32336634T>G	c.T2279G	p.L760X	stopgain	Pathogenic
g.32336642del	c.2287delC	p.H763Mfs	frameshift deletion	Pathogenic
g.32336664_32336668del	c.2306_2310del	p.I770Nfs	frameshift deletion	Pathogenic
g.32336667T>G	c.T2312G	p.L771X	stopgain	Pathogenic
g.32336674del	c.2319delT	p.T774Lfs	frameshift deletion	Pathogenic
g.32336680del	c.2324delC	p.K776Rfs	frameshift deletion	Pathogenic
g.32336682del	c.2326delA	p.K776Rfs	frameshift deletion	Pathogenic
g.32336685dup	c.2330dupA	p.D777Efs	frameshift insertion	Pathogenic
g.32336691del	c.2336delT	p.L779Rfs	frameshift deletion	Pathogenic
g.32336694C>G	c.C2339G	p.S780X	stopgain	Pathogenic
g.32336719del	c.2364delC	p.E790Nfs	frameshift deletion	Pathogenic
g.32336723G>T	c.G2368T	p.E790X	stopgain	Pathogenic
g.32336725del	c.2369delA	p.E790Dfs	frameshift deletion	Pathogenic
g.32336727C>A	c.C2372A	p.S791X	stopgain	Pathogenic
g.32336731C>A	c.C2376A	p.Y792X	stopgain	Pathogenic
g.32336735dup	c.2377dupA	p.M794Nfs	frameshift insertion	Pathogenic
g.32336731C>G	c.C2376G	p.Y792X	stopgain	Pathogenic
g.32336739C>G	c.C2384G	p.S795X	stopgain	Pathogenic
g.32336752del	c.2395delA	p.G800Vfs	frameshift deletion	Pathogenic
g.32336753_32336778dup	c.2396_2397insAGGTAACAATTATGAATCTGATGTTG	p.L809Vfs	frameshift insertion	Pathogenic
g.32336754dup	c.2398dupG	p.N801fs	frameshift insertion	Pathogenic
g.32336754del	c.2398delG	p.G800Vfs	frameshift deletion	Pathogenic
g.32336755_32336756del	c.2400_2401del	p.N801Qfs	frameshift deletion	Pathogenic
g.32336757_32336767del	c.2401_2411del	p.N801fs	frameshift deletion	Pathogenic
g.32336757_32336775del	c.2402_2420del	p.N801Mfs	frameshift deletion	Pathogenic
g.32336762dup	c.2406dupT	p.Y803Lfs	frameshift insertion	Pathogenic
g.32336764T>G	c.T2409G	p.Y803X	stopgain	Pathogenic
g.32336776dup	c.2420dupT	p.E808fs	frameshift insertion	Pathogenic
g.32336781del	c.2425delT	p.L809fs	stopgain	Pathogenic
g.32336781T>G	c.T2426G	p.L809X	stopgain	Pathogenic
g.32336785_32336792del	c.2430_2437del	p.K811Sfs	frameshift deletion	Pathogenic
g.32336790dup	c.2431dupA	p.N812Kfs	frameshift insertion	Pathogenic
g.32336790del	c.2431delA	p.N812Ifs	frameshift deletion	Pathogenic
g.32336794dup	c.2438dupT	p.P814Sfs	frameshift insertion	Pathogenic
g.32336797del	c.2440delC	p.M815Wfs	frameshift deletion	Pathogenic
g.32336801del	c.2445delG	p.E816Kfs	frameshift deletion	Pathogenic
g.32336805del	c.2447delA	p.K817Rfs	frameshift deletion	Pathogenic
g.32336806_32336807dup	c.2449_2450insAG	p.N818Rfs	frameshift insertion	Pathogenic
g.32336809_32336812del	c.2452_2455del	p.N818Kfs	frameshift deletion	Pathogenic
g.32336810C>T	c.C2455T	p.Q819X	stopgain	Pathogenic
g.32336821T>A	c.T2466A	p.C822X	stopgain	Pathogenic
g.32336826del	c.2469delT	p.L824fs	frameshift deletion	Pathogenic
g.32336826_32336831del	c.2471_2476del	p.L824_I3418del	stopgain	Pathogenic
g.32336826T>G	c.T2471G	p.L824X	stopgain	Pathogenic
g.32336829del	c.2472delA	p.N825Mfs	frameshift deletion	Pathogenic
g.32336835dup	c.2477dupA	p.N827Kfs	frameshift insertion	Pathogenic
g.32336844dup	c.2485dupA	p.N830Kfs	frameshift insertion	Pathogenic
g.32336844_32336845insT	c.2489_2490insT	p.V831Rfs	frameshift insertion	Pathogenic
g.32336845_32336846insT	c.2490_2491insT	p.V831Cfs	frameshift insertion	Pathogenic
g.32336849G>T	c.G2494T	p.E832X	stopgain	Pathogenic
g.32336856del	c.2500delT	p.L834Cfs	frameshift deletion	Pathogenic
g.32336864_32336868del	c.2509_2513del	p.E837Ifs	frameshift deletion	Pathogenic
g.32336869dup	c.2510dupA	p.Y839Ifs	frameshift insertion	Pathogenic
g.32336869del	c.2510delA	p.K838Nfs	frameshift deletion	Pathogenic
g.32336867A>T	c.A2512T	p.K838X	stopgain	Pathogenic
g.32336871dup	c.2516dupA	p.Y839fs	stopgain	Pathogenic
g.32336872C>A	c.C2517A	p.Y839X	stopgain	Pathogenic
g.32336881dup	c.2526dupA	p.A843Sfs	frameshift insertion	Pathogenic
g.32336894dup	c.2538dupA	p.R847Kfs	frameshift insertion	Pathogenic
g.32336892C>G	c.C2537G	p.S846X	stopgain	Pathogenic
g.32336894A>T	c.A2539T	p.R847X	stopgain	Pathogenic
g.32336900del	c.2544delG	p.V849Yfs	frameshift deletion	Pathogenic
g.32336903C>T	c.C2548T	p.Q850X	stopgain	Pathogenic
g.32336908del	c.2553delC	p.F851Lfs	frameshift deletion	Pathogenic
g.32336917_32336918CA	c.2561_2562del	p.T855Kfs	frameshift deletion	Pathogenic
g.32336925dup	c.2570dupT	p.R858Kfs	frameshift insertion	Pathogenic
g.32336943dup	c.2582dupA	p.N863Kfs	frameshift insertion	Pathogenic
g.32336936C>T	c.C2581T	p.Q861X	stopgain	Pathogenic
g.32336941_32336947del	c.2584_2590del	p.N863Kfs	frameshift deletion	Pathogenic
g.32336944del	c.2589delT	p.Q864Kfs	frameshift deletion	Pathogenic
g.32336945C>T	c.C2590T	p.Q864X	stopgain	Pathogenic
g.32336948G>T	c.G2593T	p.E865X	stopgain	Pathogenic
g.32336950del	c.2594delA	p.E866Kfs	frameshift deletion	Pathogenic
g.32336951_32336954del	c.2594_2597del	p.E866Lfs	frameshift deletion	Pathogenic
g.32336951G>T	c.G2596T	p.E866X	stopgain	Pathogenic
g.32336958del	c.2603delC	p.T868Ifs	frameshift deletion	Pathogenic
g.32336961C>G	c.C2606G	p.S869X	stopgain	Pathogenic
g.32336966dup	c.2609dupT	p.S871Ffs	frameshift insertion	Pathogenic
g.32336967C>A	c.C2612A	p.S871X	stopgain	Pathogenic
g.32336972dup	c.2613dupA	p.I873Nfs	frameshift insertion	Pathogenic
g.32336967C>G	c.C2612G	p.S871X	stopgain	Pathogenic
g.32336967delinsTTT	c.2612delinsTTT	p.S871Ffs	stopgain	Pathogenic
g.32336973_32336974del	c.2617_2618del	p.I873Nfs	frameshift deletion	Pathogenic
g.32336973dup	c.2618dupT	p.T874Nfs	frameshift insertion	Pathogenic
g.32336976_32336977insG	c.2621_2622insG	p.V875Cfs	frameshift insertion	Pathogenic
g.32336977dup	c.2622dupT	p.V875Cfs	frameshift insertion	Pathogenic
g.32336978_32336979del	c.2622_2623del	p.V875Qfs	frameshift deletion	Pathogenic
g.32336978G>C	c.G2623C	p.V875L	nonsynonymous SNV	Likely_pathogenic
g.32336989_32336990CT	c.2634_2635del	p.S879fs	frameshift deletion	Pathogenic
g.32336992_32336993del	c.2637_2638del	p.E880Rfs	frameshift deletion	Pathogenic
g.32336996G>T	c.G2641T	p.E881X	stopgain	Pathogenic
g.32336999del	c.2644delC	p.L882Ffs	frameshift deletion	Pathogenic
g.32337003del	c.2645delT	p.F883Sfs	frameshift deletion	Pathogenic
g.32337005del	c.2650delT	p.S884Qfs	frameshift deletion	Pathogenic
g.32337008_32337011del	c.2651_2654del	p.D885Mfs	frameshift deletion	Pathogenic
g.32337006C>A	c.C2651A	p.S884X	stopgain	Pathogenic
g.32337006C>G	c.C2651G	p.S884X	stopgain	Pathogenic
g.32337010_32337011del	c.2654_2655del	p.D885Efs	frameshift deletion	Pathogenic
g.32337012del	c.2656delA	p.N886Mfs	frameshift deletion	Pathogenic
g.32337013_32337014dup	c.2657_2658insTG	p.E887Vfs	frameshift insertion	Pathogenic
g.32337013_32337014del	c.2658_2659del	p.N886Kfs	frameshift deletion	Pathogenic
g.32337025del	c.2667delT	p.F890Lfs	frameshift deletion	Pathogenic
g.32337027dup	c.2672dupT	p.F892Lfs	frameshift insertion	Pathogenic/Likely_pathogenic
g.32337032del	c.2676delC	p.Q893Kfs	frameshift deletion	Pathogenic
g.32337032C>T	c.C2677T	p.Q893X	stopgain	Pathogenic
g.32337039del	c.2684delC	p.A895Vfs	frameshift deletion	Pathogenic
g.32337042_32337043insGA	c.2686_2687insAG	p.N896Kfs	frameshift insertion	Likely_pathogenic
g.32337047_32337051del	c.2689_2693del	p.R898fs	frameshift deletion	Pathogenic
g.32337044G>T	c.G2689T	p.E897X	stopgain	Pathogenic/Likely_pathogenic
g.32337056del	c.2701delC	p.A902Lfs	frameshift deletion	Pathogenic
g.32337058del	c.2702delT	p.A902Lfs	frameshift deletion	Pathogenic
g.32337059dup	c.2704dupG	p.A902Gfs	frameshift insertion	Likely_pathogenic
g.32337071dup	c.2716dupA	p.T906Nfs	frameshift insertion	Pathogenic
g.32337086del	c.2731delG	p.E911Kfs	frameshift deletion	Pathogenic
g.32337093_32337097ACTTG	c.2737_2741del	p.T915Cfs	frameshift deletion	Pathogenic
g.32337100_32337101del	c.2745_2746del	p.V917Kfs	frameshift deletion	Pathogenic
g.32337103del	c.2748delT	p.C916Wfs	frameshift deletion	Pathogenic
g.32337103T>A	c.T2748A	p.C916X	stopgain	Pathogenic
g.32337108del	c.2751delA	p.N918Tfs	frameshift deletion	Pathogenic
g.32337109del	c.2754delC	p.N918Kfs	frameshift deletion	Pathogenic
g.32337112_32337113insATGG	c.2757_2758insATGG	p.P920Mfs	frameshift insertion	Pathogenic
g.32337115del	c.2758delC	p.I921Ffs	frameshift deletion	Pathogenic
g.32337113_32337114insATGG	c.2758_2759insATGG	p.P920Hfs	frameshift insertion	Pathogenic
g.32337120dup	c.2762dupT	p.K923Qfs	frameshift insertion	Pathogenic
g.32337119_32337132del	c.2764_2777del	p.F922Hfs	frameshift deletion	Pathogenic
g.32337127_32337128CT	c.2772_2773del	p.S925Yfs	frameshift deletion	Pathogenic
g.32337128dup	c.2773dupT	p.S925Ffs	frameshift insertion	Pathogenic
g.32337128_32337130delinsGA	c.2773_2775GA	p.S925Efs	frameshift substitution	Pathogenic
g.32337130dup	c.2775dupT	p.T926Yfs	frameshift insertion	Pathogenic
g.32337130del	c.2775delT	p.T926Pfs	frameshift deletion	Pathogenic
g.32337131_32337135del	c.2775_2779del	p.T926Gfs	frameshift deletion	Pathogenic
g.32337136_32337140del	c.2780_2784del	p.M927Ifs	frameshift deletion	Pathogenic
g.32337141dup	c.2783dupT	p.L929Ffs	frameshift insertion	Pathogenic
g.32337141del	c.2783delT	p.L929Yfs	frameshift deletion	Pathogenic
g.32337141T>G	c.T2786G	p.L929X	stopgain	Pathogenic
g.32337151_32337152CA	c.2795_2796del	p.T933Rfs	frameshift deletion	Pathogenic
g.32337153del	c.2798delC	p.T933Kfs	frameshift deletion	Pathogenic
g.32337160_32337163del	c.2804_2807del	p.A938Pfs	frameshift deletion	Pathogenic
g.32337163del	c.2806delA	p.K936Nfs	frameshift deletion	Pathogenic
g.32337163_32337166del	c.2806_2809del	p.A938Pfs	frameshift deletion	Pathogenic
g.32337167_32337170del	c.2809_2812del	p.A938Pfs	frameshift deletion	Pathogenic
g.32337165_32337166del	c.2810_2811del	p.Q937Rfs	frameshift deletion	Pathogenic
g.32337173C>T	c.C2818T	p.Q940X	stopgain	Pathogenic
g.32337183_32337186del	c.2826_2829del	p.I943Kfs	frameshift deletion	Pathogenic
g.32337190dup	c.2830dupA	p.D946Rfs	frameshift insertion	Pathogenic
g.32337190del	c.2830delA	p.D946Ifs	frameshift deletion	Pathogenic
g.32337189_32337190del	c.2830_2831del	p.K945Rfs	frameshift deletion	Pathogenic
g.32337185A>T	c.A2830T	p.K944X	stopgain	Pathogenic
g.32337187_32337188insTT	c.2832_2833insTT	p.K945Lfs	frameshift insertion	Pathogenic
g.32337188_32337189insTT	c.2833_2834insTT	p.K945Ifs	frameshift insertion	Pathogenic
g.32337188A>T	c.A2833T	p.K945X	stopgain	Pathogenic
g.32337191_32337192del	c.2835_2836del	p.D946Ffs	frameshift deletion	Pathogenic
g.32337191del	c.2836delG	p.D946Ifs	frameshift deletion	Pathogenic
g.32337195del	c.2838delT	p.L947Wfs	frameshift deletion	Pathogenic
g.32337197dup	c.2841dupG	p.V948Gfs	frameshift insertion	Pathogenic
g.32337200del	c.2843delT	p.Y949Mfs	frameshift deletion	Pathogenic
g.32337202T>A	c.T2847A	p.Y949X	stopgain	Pathogenic
g.32337213del	c.2858delA	p.E953Gfs	frameshift deletion	Pathogenic
g.32337215del	c.2859delG	p.E954Rfs	frameshift deletion	Pathogenic
g.32337215G>T	c.G2860T	p.E954X	stopgain	Pathogenic
g.32337225del	c.2866delA	p.N957Ifs	frameshift deletion	Pathogenic
g.32337235del	c.2880delG	p.K960Nfs	frameshift deletion	Pathogenic
g.32337236C>T	c.C2881T	p.Q961X	stopgain	Pathogenic
g.32337239_32337263del	c.2882_2906del	p.H962fs	frameshift deletion	Pathogenic
g.32337238del	c.2883delG	p.Q961Hfs	frameshift deletion	Pathogenic
g.32337241_32337499del	c.2885_3143del	p.H962Qfs	frameshift deletion	Pathogenic/Likely_pathogenic
g.32337241dup	c.2886dupT	p.I963Yfs	frameshift insertion	Pathogenic
g.32337241_32337469del	c.2886_3114del	p.I963Lfs	frameshift deletion	Likely_pathogenic
g.32337251dup	c.2896dupA	p.T966Nfs	frameshift insertion	Pathogenic
g.32337252_32337253CT	c.2897_2898del	p.L967Rfs	frameshift deletion	Pathogenic
g.32337260C>T	c.C2905T	p.Q969X	stopgain	Pathogenic
g.32337267T>G	c.T2912G	p.L971X	stopgain	Pathogenic
g.32337273C>A	c.C2918A	p.S973X	stopgain	Pathogenic
g.32337279_32337280TC	c.2924_2925del	p.S976Lfs	frameshift deletion	Pathogenic
g.32337285_32337295del	c.2929_2939del	p.L977fs	frameshift deletion	Pathogenic
g.32337299dup	c.2941dupA	p.I982Nfs	frameshift insertion	Pathogenic
g.32337300del	c.2945delT	p.I982Nfs	frameshift deletion	Pathogenic
g.32337312dup	c.2951dupA	p.N986Kfs	frameshift insertion	Pathogenic
g.32337305G>T	c.G2950T	p.E984X	stopgain	Pathogenic
g.32337312del	c.2951delA	p.N986Ifs	frameshift deletion	Pathogenic
g.32337309_32337312del	c.2951_2954del	p.K985Ifs	frameshift deletion	Pathogenic
g.32337311_32337312insG	c.2956_2957insG	p.N986Rfs	frameshift insertion	Pathogenic
g.32337312_32337313insG	c.2957_2958insG	p.N986Kfs	frameshift insertion	Pathogenic
g.32337313del	c.2958delT	p.N986Kfs	frameshift deletion	Pathogenic
g.32337315dup	c.2959dupA	p.N987Kfs	frameshift insertion	Pathogenic
g.32337316del	c.2961delT	p.N987Kfs	frameshift deletion	Pathogenic
g.32337326_32337338del	c.2970_2982del	p.N991Dfs	frameshift deletion	Pathogenic
g.32337331del	c.2974delA	p.K992Nfs	frameshift deletion	Pathogenic
g.32337333G>A	c.G2978A	p.W993X	stopgain	Pathogenic
g.32337334G>A	c.G2979A	p.W993X	stopgain	Pathogenic
g.32337338G>T	c.G2983T	p.G995X	stopgain	Pathogenic
g.32337344_32337345del	c.2989_2990del	p.L997Rfs	frameshift deletion	Likely_pathogenic
g.32337345T>A	c.T2990A	p.L997X	stopgain	Pathogenic
g.32337345T>G	c.T2990G	p.L997X	stopgain	Pathogenic
g.32337356dup	c.2999dupT	p.S1001Ffs	frameshift insertion	Pathogenic
g.32337356del	c.2999delT	p.S1001Qfs	frameshift deletion	Pathogenic
g.32337357C>G	c.C3002G	p.S1001X	stopgain	Pathogenic
g.32337362_32337363CA	c.3007_3008del	p.H1003Qfs	frameshift deletion	Pathogenic
g.32337365del	c.3010delA	p.S1004Vfs	frameshift deletion	Pathogenic
g.32337369_32337370dup	c.3011_3012insTT	p.G1006Lfs	frameshift insertion	Pathogenic
g.32337371G>T	c.G3016T	p.G1006X	stopgain	Pathogenic
g.32337373del	c.3018delA	p.G1007Vfs	frameshift deletion	Pathogenic
g.32337387del	c.3032delC	p.T1011Kfs	frameshift deletion	Pathogenic
g.32337391_32337394del	c.3036_3039del	p.S1013Ifs	frameshift deletion	Pathogenic
g.32337398A>T	c.A3043T	p.K1015X	stopgain	Pathogenic
	c.G3046T	p.E1016X	stopgain	reviewed_by_expert_panel
g.32337406del	c.3051delC	p.K1018Sfs	frameshift deletion	Pathogenic
g.32337410CT	c.3055_3056del	p.S1020fs	frameshift deletion	Pathogenic
g.32337415_32337416del	c.3060_3061del	p.E1021Tfs	frameshift deletion	Pathogenic
g.32337416del	c.3061delG	p.E1021Nfs	frameshift deletion	Likely_pathogenic
g.32337417_32337421AACAT	c.3062_3066del	p.N1023fs	frameshift deletion	Pathogenic
g.32337421dup	c.3066dupT	p.N1023fs	stopgain	Pathogenic
g.32337423dup	c.3067dupA	p.N1023Kfs	frameshift insertion	Pathogenic
g.32337423del	c.3067delA	p.N1023Tfs	frameshift deletion	Pathogenic
g.32337423_32337426del	c.3068_3071del	p.N1023Ifs	frameshift deletion	Pathogenic
g.32337424del	c.3069delC	p.N1023Kfs	frameshift deletion	Pathogenic
g.32337428A>T	c.A3073T	p.K1025X	stopgain	Pathogenic
g.32337435_32337462del	c.3075_3102del	p.S1027Nfs	frameshift deletion	Pathogenic
g.32337432del	c.3076delA	p.K1026Rfs	frameshift deletion	Pathogenic
g.32337430_32337431delinsTT	c.3075_3076TT	p.K1025_I3418delinsN	stopgain	Pathogenic
g.32337431_32337432del	c.3076_3077del	p.K1026Efs	frameshift deletion	Likely_pathogenic
g.32337431A>T	c.A3076T	p.K1026X	stopgain	Pathogenic
g.32337441dup	c.3086dupT	p.M1029Ifs	frameshift insertion	Pathogenic
g.32337451del	c.3094delA	p.D1033Ifs	frameshift deletion	Pathogenic
g.32337449A>T	c.A3094T	p.K1032X	stopgain	Pathogenic
g.32337451_32337465delinsT	c.3096_3110T	p.K1032Nfs	frameshift substitution	Pathogenic
g.32337453AT	c.3098_3099del	p.I1034fs	frameshift deletion	Pathogenic/Likely_pathogenic
g.32337455dup	c.3100dupA	p.I1034Nfs	frameshift insertion	Pathogenic
g.32337458G>T	c.G3103T	p.E1035X	stopgain	Pathogenic
g.32337461G>T	c.G3106T	p.E1036X	stopgain	Pathogenic
g.32337464C>T	c.C3109T	p.Q1037X	stopgain	Pathogenic
g.32337486_32337487GT	c.3130_3131del	p.V1045fs	frameshift deletion	Pathogenic
g.32337501del	c.3144delA	p.N1049Ifs	frameshift deletion	Pathogenic
g.32337505del	c.3149delC	p.L1051Wfs	frameshift deletion	Pathogenic
g.32337505_32337508delinsATTTT	c.3150_3153ATTTT	p.L1051Ffs	frameshift substitution	Pathogenic
g.32337512_32337518del	c.3156_3162del	p.L1053Ifs	frameshift deletion	Pathogenic
g.32337515_32337518del	c.3158_3161del	p.D1054Ifs	frameshift deletion	Pathogenic
g.32337512_32337523delinsAG	c.3157_3168AG	p.L1053Rfs	frameshift substitution	Pathogenic
g.32337513T>G	c.T3158G	p.L1053X	stopgain	Pathogenic
g.32337520_32337523del	c.3163_3166del	p.N1055Kfs	frameshift deletion	Pathogenic
g.32337520_32337522delinsCC	c.3165_3167CC	p.K1057Rfs	frameshift substitution	Pathogenic
g.32337521C>T	c.C3166T	p.Q1056X	stopgain	Pathogenic
g.32337525del	c.3167delA	p.K1057Rfs	frameshift deletion	Pathogenic
g.32337522_32337525del	c.3167_3170del	p.Q1056Rfs	frameshift deletion	Pathogenic
g.32337525_32337529del	c.3167_3171del	p.K1057Tfs	frameshift deletion	Pathogenic
g.32337526_32337527del	c.3170_3171del	p.K1058Tfs	frameshift deletion	Pathogenic
g.32337529dup	c.3172dupA	p.L1059Tfs	frameshift insertion	Pathogenic/Likely_pathogenic
g.32337527A>T	c.A3172T	p.K1058X	stopgain	Pathogenic
g.32337530del	c.3175delC	p.L1059fs	stopgain	Pathogenic
g.32337531_32337532del	c.3176_3177del	p.L1059Qfs	frameshift deletion	Pathogenic
g.32337537del	c.3181delA	p.K1061Sfs	frameshift deletion	Pathogenic
g.32337544_32337547del	c.3186_3189del	p.S1064Lfs	frameshift deletion	Pathogenic
g.32337542_32337543insG	c.3187_3188insG	p.Q1063Rfs	frameshift insertion	Pathogenic
g.32337542C>T	c.C3187T	p.Q1063X	stopgain	Pathogenic
g.32337546C>A	c.C3191A	p.S1064X	stopgain	Pathogenic
g.32337546C>G	c.C3191G	p.S1064X	stopgain	Pathogenic
g.32337550_32337553del	c.3192_3195del	p.N1066Lfs	frameshift deletion	Pathogenic
g.32337550del	c.3194delT	p.N1066Ifs	frameshift deletion	Pathogenic
g.32337554del	c.3199delA	p.T1067Lfs	frameshift deletion	Pathogenic
g.32337556del	c.3201delT	p.V1068Yfs	frameshift deletion	Pathogenic
g.32337557del	c.3202delG	p.V1068Yfs	frameshift deletion	Pathogenic
g.32337557_32337600del	c.3202_3245del	p.V1068Kfs	frameshift deletion	Pathogenic
g.32337560_32337561insAATTGCAGTCAATTAATAT	c.3202_3203insTATAATTGCAGTCAATTAA	p.S1069fs	stopgain	Pathogenic
g.32337559_32337562del	c.3203_3206del	p.S1069Hfs	frameshift deletion	Pathogenic
g.32337560_32337561insTAATTGCAGTCAATTAATA	c.3205_3206insTAATTGCAGTCAATTAATA	p.S1069Lfs	stopgain	Pathogenic
g.32337570dup	c.3213dupT	p.L1072Ffs	frameshift insertion	Pathogenic
g.32337570T>G	c.T3215G	p.L1072X	stopgain	Pathogenic
g.32337572C>T	c.C3217T	p.Q1073X	stopgain	Pathogenic
g.32337576_32337580GTAGT	c.3221_3225del	p.V1076Cfs	frameshift deletion	Pathogenic
g.32337577_32337580del	c.3222_3225del	p.S1074Rfs	frameshift deletion	Pathogenic
g.32337583_32337584del	c.3228_3229del	p.V1077Cfs	frameshift deletion	Pathogenic
g.32337590dup	c.3233dupT	p.S1079Ffs	frameshift insertion	Pathogenic
g.32337590del	c.3233delT	p.S1079Lfs	frameshift deletion	Pathogenic
g.32337596del	c.3240delT	p.C1081Vfs	frameshift deletion	Pathogenic
g.32337603dup	c.3244dupA	p.N1083Kfs	frameshift insertion	Pathogenic
g.32337603del	c.3244delA	p.N1083Ifs	frameshift deletion	Pathogenic
g.32337599A>T	c.A3244T	p.K1082X	stopgain	Pathogenic
g.32337606_32337609del	c.3250_3253del	p.S1084fs	frameshift deletion	Pathogenic
g.32337610_32337611TA	c.3254_3255del	p.I1086Nfs	frameshift deletion	Pathogenic
g.32337614dup	c.3258dupA	p.T1087Nfs	frameshift insertion	Pathogenic
g.32337618dup	c.3260dupC	p.Q1089Sfs	frameshift insertion	Pathogenic
g.32337617_32337618del	c.3260_3261del	p.P1088Sfs	frameshift deletion	Pathogenic
g.32337619dup	c.3264dupT	p.Q1089Sfs	frameshift insertion	Pathogenic
g.32337619_32337620insTT	c.3263_3264insTT	p.Q1089Ffs	frameshift insertion	Pathogenic
g.32337619del	c.3264delT	p.Q1089Rfs	frameshift deletion	Pathogenic
g.32337620C>T	c.C3265T	p.Q1089X	stopgain	Pathogenic
g.32337622_32337623del	c.3266_3267del	p.Q1089Hfs	frameshift deletion	Pathogenic
g.32337624del	c.3269delT	p.M1090Sfs	frameshift deletion	Pathogenic
g.32337625del	c.3270delG	p.M1090Ifs	frameshift deletion	Pathogenic
g.32337628_32337631del	c.3271_3274del	p.L1091Ffs	frameshift deletion	Pathogenic
g.32337627T>A	c.T3272A	p.L1091X	stopgain	Pathogenic
g.32337632del	c.3274delT	p.S1093Pfs	frameshift deletion	Pathogenic
g.32337635A>T	c.A3280T	p.K1094X	stopgain	Pathogenic
g.32337638del	c.3283delC	p.Q1095Rfs	frameshift deletion	Pathogenic
g.32337638C>T	c.C3283T	p.Q1095X	stopgain	Pathogenic
g.32337646dup	c.3288dupT	p.N1098fs	frameshift insertion	Pathogenic
g.32337648del	c.3292delA	p.N1098Ifs	frameshift deletion	Pathogenic
g.32337650del	c.3294delT	p.S1099Qfs	frameshift deletion	Pathogenic
g.32337651C>A	c.C3296A	p.S1099X	stopgain	Pathogenic
g.32337651C>G	c.C3296G	p.S1099X	stopgain	Pathogenic
g.32337658_32337691dup	c.3300_3301insCATAATTTAACACCTAGCCAAAAGGCAGAAATTA	p.E1113fs	frameshift insertion	Pathogenic
g.32337663dup	c.3306dupT	p.L1103Ffs	frameshift insertion	Pathogenic
g.32337662_32337663dup	c.3305_3306insTT	p.L1103Ffs	frameshift insertion	Pathogenic
g.32337663del	c.3306delT	p.L1103fs	frameshift deletion	Pathogenic
g.32337663T>G	c.T3308G	p.L1103X	stopgain	Pathogenic
g.32337674C>T	c.C3319T	p.Q1107X	stopgain	Pathogenic
g.32337678del	c.3320delA	p.K1108Rfs	frameshift deletion	Pathogenic
g.32337677A>T	c.A3322T	p.K1108X	stopgain	Pathogenic
g.32337681del	c.3326delC	p.A1109Efs	frameshift deletion	Pathogenic
g.32337683G>T	c.G3328T	p.E1110X	stopgain	Pathogenic
g.32337686del	c.3329delA	p.I1111Lfs	frameshift deletion	Pathogenic
g.32337690del	c.3335delC	p.T1112Kfs	frameshift deletion	Pathogenic
g.32337691del	c.3336delA	p.E1113Nfs	frameshift deletion	Pathogenic
g.32337692_32337693del	c.3336_3337del	p.E1113Tfs	frameshift deletion	Pathogenic
g.32337698del	c.3341delT	p.S1115Lfs	frameshift deletion	Pathogenic
g.32337699del	c.3344delC	p.S1115Lfs	frameshift deletion	Pathogenic
g.32337700_32337701dup	c.3344_3345insTA	p.T1116Ifs	frameshift insertion	Pathogenic
g.32337701_32337702del	c.3346_3347del	p.T1116Yfs	frameshift deletion	Pathogenic
g.32337704_32337705AT	c.3347_3348insTA	p.L1118Yfs	frameshift insertion	Pathogenic
g.32337704del	c.3349delA	p.I1117Yfs	frameshift deletion	Pathogenic
g.32337706del	c.3351delA	p.L1118fs	frameshift deletion	Pathogenic
g.32337707_32337711del	c.3351_3355del	p.L1118Rfs	frameshift deletion	Pathogenic
g.32337708_32337710del	c.3353_3355del	p.L1118_I3418del	stopgain	Pathogenic
g.32337709del	c.3354delA	p.E1119Kfs	frameshift deletion	Pathogenic
g.32337713del	c.3358delG	p.E1120Nfs	frameshift deletion	Pathogenic
g.32337717C>A	c.C3362A	p.S1121X	stopgain	Pathogenic
g.32337717C>G	c.C3362G	p.S1121X	stopgain	Pathogenic
g.32337720del	c.3364delG	p.G1122Efs	frameshift deletion	Pathogenic
g.32337719_32337725delinsATTCTTCTAATTAATTGAATCAATTAAATTCAAACTG	c.3364_3370ATTCTTCTAATTAATTGAATCAATTAAATTCAAACTG	p.G1122_I3418delinsILLIN	stopgain	Pathogenic
g.32337721_32337722del	c.3366_3367del	p.Q1124Vfs	frameshift deletion	Pathogenic
g.32337731G>T	c.G3376T	p.E1126X	stopgain	Pathogenic
g.32337736del	c.3379delT	p.F1127Lfs	frameshift deletion	Pathogenic
g.32337741dup	c.3386dupA	p.F1130Vfs	frameshift insertion	Pathogenic
g.32337740C>T	c.C3385T	p.Q1129X	stopgain	Pathogenic/Likely_pathogenic
g.32337745del	c.3388delT	p.F1130Lfs	frameshift deletion	Pathogenic
g.32337751dup	c.3393dupA	p.P1133Tfs	frameshift insertion	Pathogenic
g.32337751del	c.3393delA	p.K1132Nfs	frameshift deletion	Pathogenic
g.32337756del	c.3401delG	p.S1134Tfs	frameshift deletion	Pathogenic/Likely_pathogenic
g.32337760C>A	c.C3405A	p.Y1135X	stopgain	Pathogenic
g.32337764_32337776del	c.3407_3419del	p.L1137Hfs	frameshift deletion	Pathogenic
g.32337766dup	c.3411dupG	p.Q1138Afs	frameshift insertion	Pathogenic
g.32337767C>T	c.C3412T	p.Q1138X	stopgain	Pathogenic
g.32337770_32337775delinsG	c.3415_3420G	p.K1139Dfs	frameshift substitution	Pathogenic
g.32337777del	c.3422delC	p.T1141Nfs	frameshift deletion	Pathogenic
g.32337785del	c.3430delG	p.V1144Cfs	frameshift deletion	Pathogenic
g.32337791G>T	c.G3436T	p.E1146X	stopgain	Pathogenic
g.32337797C>T	c.C3442T	p.Q1148X	stopgain	Pathogenic
g.32337803_32337804insAG	c.3448_3449insAG	p.T1150Kfs	frameshift insertion	Pathogenic
g.32337805dup	c.3450dupT	p.I1151Yfs	frameshift insertion	Pathogenic
g.32337806_32337807del	c.3450_3451del	p.I1151Lfs	frameshift deletion	Pathogenic
g.32337807dup	c.3452dupT	p.T1154Dfs	frameshift insertion	Pathogenic
g.32337807_32337810del	c.3452_3455del	p.I1151Kfs	frameshift deletion	Pathogenic
g.32337808del	c.3453delC	p.L1152fs	frameshift deletion	Pathogenic
g.32337810dup	c.3454dupT	p.L1152Ffs	frameshift insertion	Pathogenic
g.32337809_32337810dup	c.3453_3454insTT	p.L1152Ffs	frameshift insertion	Pathogenic
g.32337809_32337810del	c.3454_3455del	p.L1152Kfs	frameshift deletion	Pathogenic
g.32337810T>A	c.T3455A	p.L1152X	stopgain	Pathogenic
g.32337810T>G	c.T3455G	p.L1152X	stopgain	Pathogenic
g.32337813dup	c.3456dupA	p.T1154Dfs	frameshift insertion	Pathogenic
g.32337813del	c.3456delA	p.K1153Rfs	frameshift deletion	Pathogenic
g.32337817del	c.3461delC	p.T1155Lfs	frameshift deletion	Pathogenic
g.32337820_32337821del	c.3465_3466del	p.S1156fs	frameshift deletion	Pathogenic
g.32337824G>T	c.G3469T	p.E1157X	stopgain	Pathogenic
g.32337832C>A	c.C3477A	p.C1159X	stopgain	Pathogenic
g.32337834_32337835GA	c.3477_3478insAG	p.D1161Efs	frameshift insertion	Pathogenic
g.32337833_32337836delinsTGAGGA	c.3478_3481TGAGGA	p.R1160fs	stopgain	Pathogenic
g.32337836_32337846del	c.3481_3491del	p.D1161Sfs	frameshift deletion	Pathogenic
g.32337842del	c.3487delG	p.D1163Ifs	frameshift deletion	Pathogenic
g.32337844del	c.3489delT	p.L1164Ffs	frameshift deletion	Pathogenic
g.32337847dup	c.3491dupT	p.H1165Sfs	frameshift insertion	Pathogenic
g.32337852del	c.3497delT	p.V1166Afs	frameshift deletion	Pathogenic
g.32337855_32337856del	c.3499_3500del	p.I1167Nfs	frameshift deletion	Pathogenic
g.32337857dup	c.3501dupA	p.M1168Nfs	frameshift insertion	Pathogenic
g.32337859G>T	c.G3504T	p.M1168I	nonsynonymous SNV	Likely_pathogenic
g.32337870C>A	c.C3515A	p.S1172X	stopgain	Pathogenic
g.32337878C>T	c.C3523T	p.Q1175X	stopgain	Pathogenic
g.32337885_32337888del	c.3528_3531del	p.D1177Afs	frameshift deletion	Pathogenic
g.32337886_32337887del	c.3530_3531del	p.D1177Efs	frameshift deletion	Pathogenic
g.32337886_32337889del	c.3531_3534del	p.D1177Efs	frameshift deletion	Pathogenic
g.32337891_32337894GCAA	c.3535_3538del	p.K1180Nfs	frameshift deletion	Pathogenic
g.32337901del	c.3544delT	p.F1182Lfs	frameshift deletion	Pathogenic
g.32337900_32337901del	c.3544_3545del	p.F1182fs	frameshift deletion	Pathogenic
g.32337909_32337910del	c.3553_3554del	p.T1185Sfs	frameshift deletion	Pathogenic
g.32337909_32337918del	c.3554_3563del	p.T1185Ifs	frameshift deletion	Pathogenic
g.32337911_32337920del	c.3555_3564del	p.V1186Nfs	frameshift deletion	Pathogenic
g.32337911delinsTTACAA	c.3556delinsTTACAA	p.V1186Lfs	frameshift substitution	Pathogenic
g.32337919_32337922del	c.3564_3567del	p.K1189Gfs	frameshift deletion	Pathogenic
g.32337925del	c.3569delG	p.K1191Sfs	frameshift deletion	Pathogenic
g.32337948dup	c.3589dupA	p.N1198Kfs	frameshift insertion	Pathogenic
g.32337948del	c.3589delA	p.N1198Mfs	frameshift deletion	Pathogenic
g.32337951_32337954del	c.3594_3597del	p.D1199Vfs	frameshift deletion	Pathogenic
g.32337954_32337955del	c.3598_3599del	p.C1200fs	frameshift deletion	Pathogenic
g.32337954del	c.3599delG	p.C1200Lfs	frameshift deletion	Pathogenic
g.32337955T>A	c.T3600A	p.C1200X	stopgain	Pathogenic/Likely_pathogenic
g.32337958del	c.3603delC	p.N1201Kfs	frameshift deletion	Pathogenic
g.32337975_32337976dup	c.3618_3619insTA	p.L1208fs	frameshift insertion	Pathogenic
g.32337983_32337984del	c.3627_3628del	p.D1210fs	frameshift deletion	Pathogenic
g.32337990dup	c.3632dupA	p.N1212Kfs	frameshift insertion	Pathogenic
g.32337986G>T	c.G3631T	p.E1211X	stopgain	Pathogenic
g.32337990del	c.3632delA	p.N1212Mfs	frameshift deletion	Pathogenic
g.32337991_32337994del	c.3634_3637del	p.N1212Kfs	frameshift deletion	Pathogenic
g.32337992del	c.3637delG	p.E1213Kfs	frameshift deletion	Pathogenic
g.32337992G>T	c.G3637T	p.E1213X	stopgain	Pathogenic
g.32337994del	c.3638delA	p.V1214Wfs	frameshift deletion	Pathogenic
g.32337994_32338007del	c.3639_3652del	p.V1214Lfs	frameshift deletion	Pathogenic
g.32337996dup	c.3641dupT	p.F1216Vfs	frameshift insertion	Pathogenic
g.32337996del	c.3641delT	p.V1214Gfs	frameshift deletion	Pathogenic
g.32338003dup	c.3646dupT	p.R1217fs	frameshift insertion	Pathogenic
g.32338000_32338001delinsTAAAAAG	c.3645_3646TAAAAAG	p.F1216Kfs	frameshift substitution	Pathogenic
g.32338000_32338002delinsTA	c.3645_3647TA	p.F1216Ifs	frameshift substitution	Pathogenic
g.32338004del	c.3649delA	p.R1217Gfs	frameshift deletion	Pathogenic
g.32338033dup	c.3675dupA	p.L1227Tfs	frameshift insertion	Pathogenic
g.32338034_32338038del	c.3677_3681del	p.L1227Cfs	frameshift deletion	Pathogenic
g.32338035_32338036del	c.3680_3681del	p.L1227Qfs	frameshift deletion	Pathogenic
g.32338037_32338040del	c.3680_3683del	p.N1228Ffs	frameshift deletion	Pathogenic
g.32338036del	c.3681delG	p.N1228Mfs	frameshift deletion	Pathogenic
g.32338038delinsGG	c.3683delinsGG	p.N1228Rfs	frameshift substitution	Pathogenic
g.32338040_32338041del	c.3684_3685del	p.V1229Ffs	frameshift deletion	Pathogenic
g.32338040del	c.3685delG	p.V1229Ffs	frameshift deletion	Pathogenic
g.32338043del	c.3686delT	p.S1230Lfs	frameshift deletion	Pathogenic
g.32338044_32338045del	c.3688_3689del	p.S1230Yfs	frameshift deletion	Pathogenic
g.32338044del	c.3689delC	p.S1230Lfs	frameshift deletion	Pathogenic
g.32338051del	c.3695delA	p.A1233Lfs	frameshift deletion	Pathogenic
g.32338063dup	c.3704dupA	p.A1237Sfs	frameshift insertion	Pathogenic
g.32338058C>T	c.C3703T	p.Q1235X	stopgain	Pathogenic/Likely_pathogenic
g.32338065del	c.3710delC	p.A1237Vfs	frameshift deletion	Pathogenic
g.32338072del	c.3715delA	p.K1239Nfs	frameshift deletion	Pathogenic
g.32338075_32338076del	c.3719_3720del	p.F1241fs	frameshift deletion	Pathogenic
g.32338075_32338078del	c.3719_3722del	p.F1241Vfs	frameshift deletion	Pathogenic
g.32338078del	c.3721delT	p.F1241Lfs	frameshift deletion	Pathogenic
g.32338079dup	c.3724dupA	p.S1242Kfs	frameshift insertion	Pathogenic
g.32338078_32338080delinsAT	c.3723_3725AT	p.F1241Lfs	frameshift substitution	Pathogenic
g.32338083dup	c.3728dupA	p.D1243Efs	frameshift insertion	Pathogenic
g.32338084_32338087del	c.3729_3732del	p.D1243Efs	frameshift deletion	Pathogenic
g.32338092del	c.3736delA	p.N1246Ifs	frameshift deletion	Pathogenic
g.32338093_32338096del	c.3738_3741del	p.N1246Kfs	frameshift deletion	Pathogenic/Likely_pathogenic
g.32338094del	c.3739delA	p.I1247Lfs	frameshift deletion	Pathogenic
g.32338096del	c.3740delT	p.S1248Vfs	frameshift deletion	Pathogenic
g.32338099_32338102del	c.3742_3745del	p.S1248Rfs	frameshift deletion	Pathogenic
g.32338106dup	c.3749dupA	p.T1251Nfs	frameshift insertion	Pathogenic
g.32338103G>T	c.G3748T	p.E1250X	stopgain	Pathogenic
g.32338116_32338119delinsTTTATCTTCAAGTAAGTTTATCTTCAAGTAAATATCTTCAAGTAA	c.3761_3764TTTATCTTCAAGTAAGTTTATCTTCAAGTAAATATCTTCAAGTAA	p.E1254Vfs	frameshift substitution	Pathogenic
g.32338122del	c.3767delA	p.H1256Lfs	frameshift deletion	Likely_pathogenic
g.32338127del	c.3771delA	p.I1258fs	frameshift deletion	Pathogenic
g.32338128_32338129del	c.3772_3773del	p.I1258Kfs	frameshift deletion	Pathogenic
g.32338129_32338130del	c.3774_3775del	p.I1258Mfs	frameshift deletion	Pathogenic
g.32338134dup	c.3777dupT	p.L1260Ffs	frameshift insertion	Pathogenic
g.32338134del	c.3777delT	p.L1260Yfs	frameshift deletion	Pathogenic
g.32338133_32338134del	c.3777_3778del	p.L1260Ifs	frameshift deletion	Pathogenic
g.32338134T>A	c.T3779A	p.L1260X	stopgain	Pathogenic
g.32338134T>G	c.T3779G	p.L1260X	stopgain	Pathogenic/Likely_pathogenic
g.32338140C>A	c.C3785A	p.S1262X	stopgain	Pathogenic
g.32338140C>G	c.C3785G	p.S1262X	stopgain	Pathogenic
g.32338163_32338164del	c.3807_3808del	p.V1270Ffs	frameshift deletion	Pathogenic
g.32338166del	c.3809delT	p.S1271Qfs	frameshift deletion	Pathogenic
g.32338167C>A	c.C3812A	p.S1271X	stopgain	Pathogenic
g.32338167C>G	c.C3812G	p.S1271X	stopgain	Pathogenic
g.32338168_32338169insC	c.3813_3814insC	p.M1272Hfs	frameshift insertion	Pathogenic
g.32338169_32338170insC	c.3814_3815insC	p.M1272Tfs	frameshift insertion	Pathogenic
g.32338174dup	c.3817dupT	p.K1274fs	frameshift insertion	Pathogenic
g.32338175_32338178del	c.3820_3823del	p.K1274fs	frameshift deletion	Pathogenic
g.32338179_32338182del	c.3821_3824del	p.I1275Kfs	frameshift deletion	Pathogenic
g.32338179_32338180del	c.3823_3824del	p.I1275Rfs	frameshift deletion	Pathogenic
g.32338185del	c.3827delA	p.N1277Ifs	frameshift deletion	Pathogenic
g.32338184_32338185del	c.3827_3828del	p.N1277Sfs	frameshift deletion	Pathogenic
g.32338189_32338190del	c.3833_3834del	p.H1278Qfs	frameshift deletion	Pathogenic
g.32338191dup	c.3835dupA	p.N1279Kfs	frameshift insertion	Pathogenic
g.32338191del	c.3835delA	p.N1279Mfs	frameshift deletion	Pathogenic
g.32338192del	c.3837delT	p.N1279Kfs	frameshift deletion	Pathogenic
g.32338200_32338202delinsA	c.3845_3847A	p.T1282Nfs	frameshift substitution	Pathogenic
g.32338202_32338203del	c.3846_3847del	p.V1283Kfs	frameshift deletion	Pathogenic
g.32338202del	c.3847delG	p.V1283fs	stopgain	Pathogenic
g.32338204_32338207del	c.3847_3850del	p.S1284Kfs	frameshift deletion	Pathogenic
g.32338203dup	c.3848dupT	p.S1284Kfs	frameshift insertion	Pathogenic
g.32338204_32338205insT	c.3849_3850insT	p.S1284fs	stopgain	Pathogenic
g.32338208dup	c.3853dupG	p.E1285Gfs	frameshift insertion	Pathogenic
g.32338215dup	c.3854dupA	p.N1287Kfs	frameshift insertion	Pathogenic
g.32338215del	c.3854delA	p.N1287Ifs	frameshift deletion	Pathogenic
g.32338214_32338215del	c.3854_3855del	p.N1287fs	frameshift deletion	Pathogenic
g.32338212_32338215del	c.3854_3857del	p.K1286Ifs	frameshift deletion	Pathogenic
g.32338215_32338218del	c.3858_3861del	p.N1287Ifs	frameshift deletion	Pathogenic
g.32338216_32338220del	c.3860_3864del	p.N1287Kfs	frameshift deletion	Pathogenic
g.32338216_32338219del	c.3861_3864del	p.N1287Kfs	frameshift deletion	Pathogenic
g.32338218dup	c.3862dupA	p.N1288Kfs	frameshift insertion	Pathogenic
g.32338216_32338217insTA	c.3861_3862insTA	p.N1288fs	stopgain	Pathogenic
g.32338220_32338223del	c.3862_3865del	p.K1289Afs	frameshift deletion	Pathogenic
g.32338219_32338220del	c.3863_3864del	p.N1288Kfs	frameshift deletion	Pathogenic
g.32338222dup	c.3865dupA	p.C1290Mfs	frameshift insertion	Pathogenic
g.32338221_32338222del	c.3865_3866del	p.K1289Mfs	frameshift deletion	Pathogenic
g.32338221_32338223dup	c.3865_3866insAAT	p.C1290_I3418del	stopgain	Pathogenic
g.32338221_32338224del	c.3866_3869del	p.K1289Tfs	frameshift deletion	Pathogenic
g.32338225C>A	c.C3870A	p.C1290X	stopgain	Pathogenic
g.32338226C>T	c.C3871T	p.Q1291X	stopgain	Pathogenic
g.32338228del	c.3872delA	p.Q1291Hfs	frameshift deletion	Pathogenic
g.32338232_32338233AT	c.3877_3878del	p.L1294Tfs	frameshift deletion	Pathogenic
g.32338235_32338239del	c.3879_3883del	p.L1294Kfs	frameshift deletion	Pathogenic
g.32338236del	c.3880delT	p.L1294Yfs	frameshift deletion	Pathogenic
g.32338236T>A	c.T3881A	p.L1294X	stopgain	Pathogenic
g.32338236T>G	c.T3881G	p.L1294X	stopgain	Pathogenic
g.32338238C>T	c.C3883T	p.Q1295X	stopgain	Pathogenic
g.32338242del	c.3884delA	p.N1296Ifs	frameshift deletion	Pathogenic
g.32338261del	c.3906delT	p.G1303Afs	frameshift deletion	Pathogenic
g.32338266del	c.3911delC	p.T1304Ifs	frameshift deletion	Pathogenic
g.32338270del	c.3912delT	p.F1305Lfs	frameshift deletion	Pathogenic
g.32338269_32338270del	c.3912_3913del	p.F1305Cfs	frameshift deletion	Pathogenic/Likely_pathogenic
g.32338274del	c.3919delG	p.E1307Kfs	frameshift deletion	Pathogenic
g.32338275_32338296del	c.3920_3941del	p.E1307Gfs	frameshift deletion	Pathogenic
g.32338277G>T	c.G3922T	p.E1308X	stopgain	Pathogenic
g.32338283dup	c.3928dupA	p.T1310Nfs	frameshift insertion	Pathogenic
g.32338284del	c.3929delC	p.T1310Mfs	frameshift deletion	Pathogenic
g.32338288_32338298del	c.3931_3941del	p.N1312Kfs	frameshift deletion	Pathogenic
g.32338290dup	c.3932dupA	p.N1312Kfs	frameshift insertion	Likely_pathogenic
g.32338291_32338309del	c.3934_3952del	p.N1312Kfs	frameshift deletion	Pathogenic
g.32338292del	c.3936delT	p.Y1313Tfs	frameshift deletion	Pathogenic/Likely_pathogenic
g.32338294del	c.3939delC	p.Y1313fs	stopgain	Pathogenic
g.32338294C>A	c.C3939A	p.Y1313X	stopgain	Pathogenic
g.32338294C>G	c.C3939G	p.Y1313X	stopgain	Pathogenic
g.32338295_32338296del	c.3940_3941del	p.K1314Efs	frameshift deletion	Pathogenic
g.32338312_32338315del	c.3955_3958del	p.N1319Kfs	frameshift deletion	Pathogenic
g.32338312_32338313del	c.3957_3958del	p.N1319Kfs	frameshift deletion	Pathogenic
g.32338313G>T	c.G3958T	p.E1320X	stopgain	Pathogenic
g.32338323_32338326del	c.3967_3970del	p.K1323Ifs	frameshift deletion	Pathogenic
g.32338322A>T	c.A3967T	p.K1323X	stopgain	Pathogenic
g.32338325_32338326TA	c.3969_3970del	p.T1325Cfs	frameshift deletion	Pathogenic
g.32338326del	c.3971delA	p.Y1324Lfs	frameshift deletion	Pathogenic
g.32338327_32338330del	c.3972_3975del	p.Y1324fs	stopgain	Pathogenic
g.32338327T>G	c.T3972G	p.Y1324X	stopgain	Likely_pathogenic
g.32338330_32338333dup	c.3974_3975insTGCT	p.A1327Cfs	frameshift insertion	Pathogenic
g.32338333_32338334insTTGC	c.3978_3979insTTGC	p.A1327Lfs	frameshift insertion	Pathogenic
g.32338355_32338356del	c.4000_4001del	p.L1334Rfs	frameshift deletion	Pathogenic
g.32338356T>A	c.T4001A	p.L1334X	stopgain	Pathogenic
g.32338360dup	c.4004dupA	p.F1336fs	frameshift insertion	Pathogenic
g.32338358G>T	c.G4003T	p.E1335X	stopgain	Pathogenic
g.32338361_32338362insA	c.4006_4007insA	p.F1336Yfs	frameshift insertion	Pathogenic
g.32338361_32338362insCATC	c.4006_4007insCATC	p.F1336Sfs	frameshift insertion	Pathogenic
g.32338362_32338363insCATC	c.4007_4008insCATC	p.D1337fs	frameshift insertion	Pathogenic
g.32338363_32338364insCATC	c.4008_4009insCATC	p.D1337Hfs	frameshift insertion	Pathogenic
g.32338367_32338368dup	c.4011_4012insGG	p.S1339Afs	frameshift insertion	Pathogenic
g.32338368del	c.4012delG	p.G1338Afs	frameshift deletion	Pathogenic
g.32338368_32338369del	c.4013_4014del	p.G1338Efs	frameshift deletion	Pathogenic
g.32338369_32338370insGG	c.4014_4015insGG	p.S1339Gfs	frameshift insertion	Pathogenic
g.32338376dup	c.4020dupT	p.S1341Ffs	frameshift insertion	Pathogenic
g.32338376del	c.4020delT	p.S1341Qfs	frameshift deletion	Pathogenic
g.32338377C>A	c.C4022A	p.S1341X	stopgain	Pathogenic
g.32338385_32338389del	c.4029_4033del	p.N1344Yfs	frameshift deletion	Pathogenic
g.32338385_32338390delinsC	c.4030_4035C	p.N1344Hfs	frameshift substitution	Pathogenic
g.32338392del	c.4037delC	p.T1346Mfs	frameshift deletion	Pathogenic
g.32338392_32338393del	c.4037_4038del	p.T1346Sfs	frameshift deletion	Pathogenic
g.32338397dup	c.4040dupT	p.C1348Lfs	frameshift insertion	Pathogenic
g.32338396_32338397del	c.4040_4041del	p.C1348Yfs	frameshift deletion	Pathogenic
g.32338403dup	c.4048dupC	p.H1350Pfs	frameshift insertion	Pathogenic
g.32338403_32338406del	c.4048_4051del	p.H1350Kfs	frameshift deletion	Pathogenic
g.32338406A>T	c.A4051T	p.K1351X	stopgain	Pathogenic
g.32338413_32338417del	c.4057_4061del	p.E1353Gfs	frameshift deletion	Pathogenic
g.32338415dup	c.4058dupA	p.T1354Nfs	frameshift insertion	Pathogenic
g.32338425dup	c.4070dupT	p.F1358Ifs	frameshift insertion	Pathogenic
g.32338431del	c.4076delC	p.T1359Mfs	frameshift deletion	Pathogenic
g.32338440del	c.4085delA	p.H1362Pfs	frameshift deletion	Pathogenic
g.32338445_32338446AT	c.4090_4091del	p.I1364Mfs	frameshift deletion	Pathogenic
g.32338447dup	c.4092dupA	p.C1365Mfs	frameshift insertion	Pathogenic
g.32338447_32338448insAA	c.4091_4092insAA	p.C1365Nfs	frameshift insertion	Pathogenic
g.32338451_32338452insCATC	c.4094_4095insTCCA	p.L1366Pfs	frameshift insertion	Pathogenic
g.32338450del	c.4095delT	p.K1367Nfs	frameshift deletion	Pathogenic
g.32338450T>A	c.T4095A	p.C1365X	stopgain	Pathogenic
g.32338455_32338459del	c.4097_4101del	p.K1367Ifs	frameshift deletion	Pathogenic
g.32338452_32338453insCATC	c.4097_4098insCATC	p.K1367fs	frameshift insertion	Pathogenic
g.32338456dup	c.4099dupA	p.L1368Ifs	frameshift insertion	Pathogenic
g.32338453_32338454insCATC	c.4098_4099insCATC	p.K1367Hfs	frameshift insertion	Pathogenic
g.32338456del	c.4099delA	p.K1367Nfs	frameshift deletion	Pathogenic
g.32338458del	c.4102delT	p.L1368Yfs	frameshift deletion	Pathogenic
g.32338459del	c.4104delA	p.L1368Ffs	frameshift deletion	Pathogenic
g.32338467dup	c.4112dupA	p.F1372Vfs	frameshift insertion	Pathogenic
g.32338466C>T	c.C4111T	p.Q1371X	stopgain	Pathogenic
g.32338472dup	c.4117dupA	p.M1373Nfs	frameshift insertion	Pathogenic
g.32338476del	c.4120delA	p.K1374Rfs	frameshift deletion	Pathogenic
g.32338479del	c.4124delA	p.E1375Gfs	frameshift deletion	Pathogenic
g.32338482_32338485del	c.4127_4130del	p.G1376Afs	frameshift deletion	Pathogenic
g.32338485del	c.4128delA	p.N1377Tfs	frameshift deletion	Pathogenic
g.32338488_32338491del	c.4131_4134del	p.T1378Rfs	frameshift deletion	Pathogenic
g.32338486_32338487insTGAGGA	c.4131_4132insTGAGGA	p.T1378_I3418del	stopgain	Pathogenic
g.32338490del	c.4135delC	p.Q1379Rfs	frameshift deletion	Pathogenic
g.32338491dup	c.4136dupA	p.I1380Dfs	frameshift insertion	Pathogenic
g.32338490C>T	c.C4135T	p.Q1379X	stopgain	Pathogenic
g.32338492_32338496del	c.4136_4140del	p.I1380Rfs	frameshift deletion	Pathogenic
g.32338494_32338495dup	c.4138_4139insTT	p.K1381Lfs	frameshift insertion	Pathogenic
g.32338501_32338504del	c.4146_4149del	p.E1382Dfs	frameshift deletion	Pathogenic
g.32338503_32338504del	c.4148_4149del	p.D1383Vfs	frameshift deletion	Pathogenic
g.32338506del	c.4149delT	p.L1384Cfs	frameshift deletion	Pathogenic
g.32338506T>A	c.T4151A	p.L1384X	stopgain	Pathogenic
g.32338509C>A	c.C4154A	p.S1385X	stopgain	Pathogenic
g.32338509C>G	c.C4154G	p.S1385X	stopgain	Pathogenic
g.32338515_32338516insGGAAG	c.4160_4161insGGAAG	p.T1388Efs	frameshift insertion	Pathogenic
g.32338517_32338521del	c.4162_4166del	p.T1388Ffs	frameshift deletion	Pathogenic
g.32338524dup	c.4164dupT	p.L1390Ffs	frameshift insertion	Pathogenic
g.32338518_32338519delinsA	c.4163_4164A	p.T1388Nfs	frameshift substitution	Pathogenic
g.32338524del	c.4164delT	p.L1390Wfs	frameshift deletion	Pathogenic
g.32338523_32338524del	c.4164_4165del	p.L1390Gfs	frameshift deletion	Pathogenic
g.32338526del	c.4170delG	p.E1391Kfs	frameshift deletion	Pathogenic
g.32338525_32338526del	c.4170_4171del	p.E1391Sfs	frameshift deletion	Pathogenic
g.32338531del	c.4175delT	p.A1393Rfs	frameshift deletion	Pathogenic
g.32338532dup	c.4177dupG	p.A1393Gfs	frameshift insertion	Pathogenic
g.32338538del	c.4183delG	p.A1395Lfs	frameshift deletion	Pathogenic
g.32338543del	c.4187delA	p.E1397Kfs	frameshift deletion	Pathogenic
g.32338552T>A	c.T4197A	p.C1399X	stopgain	Pathogenic
g.32338566_32338570del	c.4210_4214del	p.S1404fs	frameshift deletion	Pathogenic
g.32338566del	c.4211delC	p.S1404fs	stopgain	Pathogenic
g.32338566C>A	c.C4211A	p.S1404X	stopgain	Pathogenic
g.32338566C>G	c.C4211G	p.S1404X	stopgain	Pathogenic
g.32338573_32338576del	c.4216_4219del	p.K1406Nfs	frameshift deletion	Pathogenic
g.32338576del	c.4220delA	p.E1407Dfs	frameshift deletion	Pathogenic
g.32338577C>T	c.C4222T	p.Q1408X	stopgain	Pathogenic
g.32338578del	c.4223delA	p.Q1408Rfs	frameshift deletion	Pathogenic
g.32338581T>A	c.T4226A	p.L1409X	stopgain	Pathogenic
g.32338583dup	c.4227dupA	p.T1410Nfs	frameshift insertion	Pathogenic
g.32338584_32338585insA	c.4229_4230insA	p.A1411Cfs	frameshift insertion	Pathogenic
g.32338598G>T	c.G4243T	p.E1415X	stopgain	Pathogenic
g.32338600del	c.4245delG	p.E1415Dfs	frameshift deletion	Pathogenic
g.32338601C>T	c.C4246T	p.Q1416X	stopgain	Pathogenic
g.32338607_32338610delinsT	c.4252_4255T	p.I1418_I3418del	stopgain	Pathogenic
g.32338613del	c.4258delG	p.D1420Ifs	frameshift deletion	Pathogenic
g.32338618dup	c.4260dupT	p.E1422fs	frameshift insertion	Pathogenic
g.32338619_32338625del	c.4262_4268del	p.E1422Lfs	frameshift deletion	Pathogenic
g.32338619_32338620GA	c.4264_4265del	p.E1422Dfs	frameshift deletion	Pathogenic
g.32338625dup	c.4269dupT	p.S1424Ffs	frameshift insertion	Likely_pathogenic
g.32338626del	c.4271delC	p.S1424Lfs	frameshift deletion	Pathogenic
g.32338628del	c.4273delG	p.D1425Ifs	frameshift deletion	Pathogenic
g.32338631dup	c.4276dupA	p.T1426Nfs	frameshift insertion	Pathogenic
g.32338632del	c.4277delC	p.T1426Nfs	frameshift deletion	Pathogenic
g.32338639dup	c.4279dupT	p.Q1429Sfs	frameshift insertion	Pathogenic
g.32338639del	c.4279delT	p.Q1429Rfs	frameshift deletion	Pathogenic
g.32338640_32338641insT	c.4285_4286insT	p.Q1429Lfs	frameshift insertion	Pathogenic
g.32338640C>T	c.C4285T	p.Q1429X	stopgain	Pathogenic
g.32338659del	c.4300delA	p.N1435Ifs	frameshift deletion	Pathogenic
g.32338659_32338660AT	c.4304_4305del	p.I1436fs	frameshift deletion	Pathogenic
g.32338660_32338664del	c.4304_4308del	p.N1435Kfs	frameshift deletion	Likely_pathogenic
g.32338660del	c.4305delT	p.N1435Kfs	frameshift deletion	Pathogenic
g.32338665_32338666GT	c.4309_4310insGT	p.A1439Sfs	frameshift insertion	Pathogenic
g.32338669del	c.4314delC	p.A1439Pfs	frameshift deletion	Pathogenic
g.32338672_32338682del	c.4317_4327del	p.K1440fs	frameshift deletion	Pathogenic
g.32338674_32338675del	c.4318_4319del	p.K1440Rfs	frameshift deletion	Pathogenic
g.32338675_32338676AG	c.4320_4321del	p.E1441Vfs	frameshift deletion	Pathogenic
g.32338680C>A	c.C4325A	p.S1442X	stopgain	Pathogenic
g.32338680C>G	c.C4325G	p.S1442X	stopgain	Pathogenic
g.32338688_32338692del	c.4330_4334del	p.K1445Cfs	frameshift deletion	Likely_pathogenic
g.32338689_32338693del	c.4334_4338del	p.K1445Sfs	frameshift deletion	Pathogenic
g.32338694del	c.4339delG	p.V1447fs	stopgain	Pathogenic
g.32338701_32338705del	c.4344_4348del	p.F1449fs	frameshift deletion	Pathogenic
g.32338708_32338714del	c.4352_4358del	p.P1454Nfs	frameshift deletion	Pathogenic
g.32338709C>T	c.C4354T	p.Q1452X	stopgain	Pathogenic
g.32338716del	c.4360delC	p.P1454Qfs	frameshift deletion	Pathogenic
g.32338718G>T	c.G4363T	p.E1455X	stopgain	Pathogenic
g.32338721G>T	c.G4366T	p.E1456X	stopgain	Pathogenic
g.32338731dup	c.4375dupA	p.N1459Kfs	frameshift insertion	Likely_pathogenic
g.32338731del	c.4375delA	p.N1459Tfs	frameshift deletion	Pathogenic
g.32338735_32338736del	c.4378_4379del	p.S1461Lfs	frameshift deletion	Pathogenic
g.32338738_32338739del	c.4383_4384del	p.L1462Kfs	frameshift deletion	Pathogenic
g.32338740dup	c.4384dupT	p.L1462Ffs	frameshift insertion	Pathogenic
g.32338746_32338748delinsTT	c.4391_4393TT	p.S1464Ffs	frameshift substitution	Pathogenic
g.32338753_32338757del	c.4395_4399del	p.L1466Ffs	frameshift deletion	Pathogenic
g.32338752T>A	c.T4397A	p.L1466X	stopgain	Pathogenic
g.32338752T>G	c.T4397G	p.L1466X	stopgain	Pathogenic
g.32338753dup	c.4398dupA	p.H1467Tfs	frameshift insertion	Pathogenic
g.32338756_32338757insA	c.4401_4402insA	p.S1468fs	frameshift insertion	Pathogenic
g.32338757_32338758insA	c.4402_4403insA	p.S1468Yfs	frameshift insertion	Pathogenic
g.32338759dup	c.4404dupT	p.D1469fs	stopgain	Pathogenic
g.32338760_32338764del	c.4404_4408del	p.D1469Kfs	frameshift deletion	Pathogenic
g.32338764_32338765del	c.4408_4409del	p.I1470Kfs	frameshift deletion	Pathogenic
g.32338764_32338768del	c.4408_4412del	p.I1470Kfs	frameshift deletion	Pathogenic
g.32338763_32338766delinsTT	c.4408_4411TT	p.I1470Lfs	frameshift substitution	Pathogenic
g.32338766_32338769AGAA	c.4410_4413del	p.K1472Tfs	frameshift deletion	Pathogenic
g.32338766A>T	c.A4411T	p.R1471X	stopgain	Pathogenic
g.32338769_32338770del	c.4413_4414del	p.K1472Efs	frameshift deletion	Pathogenic
g.32338773del	c.4417delA	p.N1473Tfs	frameshift deletion	Pathogenic
g.32338772_32338773del	c.4417_4418del	p.N1473Qfs	frameshift deletion	Pathogenic
g.32338774del	c.4419delC	p.N1473Kfs	frameshift deletion	Pathogenic
g.32338778del	c.4420delA	p.M1475Wfs	frameshift deletion	Pathogenic
g.32338779dup	c.4424dupT	p.M1475Ifs	frameshift insertion	Pathogenic
g.32338784del	c.4429delA	p.I1477Ffs	frameshift deletion	Pathogenic
g.32338790_32338794del	c.4433_4437del	p.S1479fs	frameshift deletion	Pathogenic
g.32338795T>G	c.T4440G	p.Y1480X	stopgain	Pathogenic
g.32338796G>T	c.G4441T	p.E1481X	stopgain	Pathogenic
g.32338799G>T	c.G4444T	p.E1482X	stopgain	Pathogenic
g.32338802del	c.4445delA	p.T1483Qfs	frameshift deletion	Pathogenic
g.32338803_32338804del	c.4447_4448del	p.T1483Rfs	frameshift deletion	Pathogenic
g.32338804del	c.4449delA	p.D1484Tfs	frameshift deletion	Pathogenic
g.32338811_32338814del	c.4454_4457del	p.V1486Nfs	frameshift deletion	Pathogenic
g.32338813del	c.4457delT	p.K1487Nfs	frameshift deletion	Pathogenic
g.32338816dup	c.4459dupA	p.H1488Tfs	frameshift insertion	Pathogenic
g.32338815_32338816del	c.4459_4460del	p.K1487Tfs	frameshift deletion	Pathogenic
g.32338817_32338818CA	c.4461_4462del	p.H1488Qfs	frameshift deletion	Pathogenic
g.32338820A>T	c.A4465T	p.K1489X	stopgain	Pathogenic
g.32338822_32338829delinsTGTTTTT	c.4467_4474TGTTTTT	p.K1489Nfs	frameshift substitution	Pathogenic
g.32338825dup	c.4470dupA	p.L1491Tfs	frameshift insertion	Pathogenic
g.32338826_32338829del	c.4470_4473del	p.L1491Kfs	frameshift deletion	Pathogenic
g.32338827_32338830del	c.4472_4475del	p.L1491Qfs	frameshift deletion	Pathogenic
g.32338829_32338832AAAG	c.4473_4476del	p.E1493Vfs	frameshift deletion	Pathogenic
g.32338831dup	c.4474dupA	p.E1493Rfs	frameshift insertion	Pathogenic
g.32338831del	c.4474delA	p.E1493Kfs	frameshift deletion	Pathogenic
g.32338829A>T	c.A4474T	p.K1492X	stopgain	Likely_pathogenic
g.32338832_32338833del	c.4476_4477del	p.E1493Kfs	frameshift deletion	Pathogenic
g.32338835dup	c.4478dupA	p.S1494Kfs	frameshift insertion	Pathogenic
g.32338836_32338837GT	c.4481_4482del	p.V1495Pfs	frameshift deletion	Pathogenic
g.32338860_32338861insT	c.4505_4506insT	p.Q1502Hfs	frameshift insertion	Pathogenic
g.32338861_32338862insT	c.4506_4507insT	p.L1503Sfs	frameshift insertion	Pathogenic
g.32338870_32338880del	c.4512_4522del	p.F1506Tfs	frameshift deletion	Pathogenic
g.32338868del	c.4513delA	p.T1505Pfs	frameshift deletion	Pathogenic
g.32338874del	c.4518delC	p.Q1507Rfs	frameshift deletion	Pathogenic
g.32338878dup	c.4521dupG	p.Q1509Tfs	frameshift insertion	Pathogenic
g.32338880C>T	c.C4525T	p.Q1509X	stopgain	Pathogenic
g.32338885del	c.4528delC	p.E1511Nfs	frameshift deletion	Pathogenic
g.32338886G>T	c.G4531T	p.E1511X	stopgain	Pathogenic
g.32338888del	c.4532delA	p.E1511Dfs	frameshift deletion	Pathogenic
g.32338890del	c.4535delG	p.R1512Lfs	frameshift deletion	Pathogenic
g.32338891_32338894dup	c.4535_4536insTGAT	p.E1514fs	frameshift insertion	Pathogenic
g.32338894_32338895insCGAT	c.4536_4537insGATC	p.E1514Rfs	frameshift insertion	Pathogenic
g.32338899dup	c.4541dupA	p.I1516Dfs	frameshift insertion	Pathogenic
g.32338895_32338896insCGAT	c.4540_4541insCGAT	p.E1514Afs	frameshift insertion	Pathogenic
g.32338899del	c.4541delA	p.K1515Rfs	frameshift deletion	Pathogenic
g.32338901dup	c.4546dupA	p.I1516Nfs	frameshift insertion	Pathogenic
g.32338903del	c.4548delC	p.E1518Nfs	frameshift deletion	Likely_pathogenic
g.32338903_32338904del	c.4548_4549del	p.K1517Rfs	frameshift deletion	Pathogenic
g.32338906_32338909del	c.4549_4552del	p.K1517Nfs	frameshift deletion	Pathogenic
g.32338906_32338948del	c.4549_4591del	p.E1518Lfs	frameshift deletion	Pathogenic
g.32338907del	c.4552delG	p.E1518Nfs	frameshift deletion	Pathogenic
g.32338907G>T	c.G4552T	p.E1518X	stopgain	Pathogenic
g.32338909del	c.4553delA	p.E1518Dfs	frameshift deletion	Pathogenic
g.32338911del	c.4555delC	p.P1519Lfs	frameshift deletion	Pathogenic
g.32338918_32338919del	c.4562_4563del	p.L1522Gfs	frameshift deletion	Pathogenic
g.32338925_32338928del	c.4570_4573del	p.F1524Ifs	frameshift deletion	Pathogenic/Likely_pathogenic
g.32338931dup	c.4576dupA	p.T1526Nfs	frameshift insertion	Pathogenic
g.32338942dup	c.4585dupG	p.K1530Efs	frameshift insertion	Pathogenic
g.32338948dup	c.4588dupA	p.V1532Sfs	frameshift insertion	Pathogenic
g.32338948del	c.4588delA	p.V1532Lfs	frameshift deletion	Pathogenic
g.32338947_32338948del	c.4588_4589del	p.K1531Sfs	frameshift deletion	Pathogenic
g.32338943A>T	c.A4588T	p.K1530X	stopgain	Pathogenic
g.32338945A>T	c.A4590T	p.K1530N	nonsynonymous SNV	Pathogenic
g.32338946A>T	c.A4591T	p.K1531X	stopgain	Pathogenic/Likely_pathogenic
g.32338949_32338953del	c.4592_4596del	p.V1532Nfs	frameshift deletion	Pathogenic
g.32338948_32338949del	c.4593_4594del	p.K1531Nfs	frameshift deletion	Pathogenic
g.32338949_32338952del	c.4593_4596del	p.V1532Kfs	frameshift deletion	Pathogenic
g.32338955dup	c.4597dupA	p.I1534Nfs	frameshift insertion	Pathogenic
g.32338970_32338971del	c.4614_4615del	p.L1539Gfs	frameshift deletion	Pathogenic
g.32338974_32338978del	c.4619_4623del	p.D1540Gfs	frameshift deletion	Pathogenic
g.32338979_32338980insCG	c.4623_4624insGC	p.V1542Afs	frameshift insertion	Likely_pathogenic
g.32338980del	c.4625delT	p.V1542Gfs	frameshift deletion	Pathogenic
g.32338986dup	c.4627dupA	p.N1544Kfs	frameshift insertion	Pathogenic
g.32338986del	c.4627delA	p.N1544Tfs	frameshift deletion	Pathogenic
g.32338988del	c.4632delC	p.L1545Ffs	frameshift deletion	Pathogenic
g.32338993dup	c.4634dupT	p.D1547fs	frameshift insertion	Pathogenic
g.32338993del	c.4634delT	p.F1546Lfs	frameshift deletion	Pathogenic
g.32338993_32338995delinsGG	c.4638_4640GG	p.F1546Lfs	frameshift substitution	Pathogenic
g.32338996del	c.4641delT	p.D1547Efs	frameshift deletion	Pathogenic
g.32339002del	c.4643delA	p.E1550Sfs	frameshift deletion	Likely_pathogenic
g.32339002_32339003AG	c.4647_4648del	p.E1550Afs	frameshift deletion	Pathogenic
g.32339002_32339005del	c.4647_4650del	p.K1549Nfs	frameshift deletion	Pathogenic
g.32339003G>T	c.G4648T	p.E1550X	stopgain	Pathogenic
g.32339006C>T	c.C4651T	p.Q1551X	stopgain	Pathogenic
g.32339009_32339012del	c.4653_4656del	p.G1552Lfs	frameshift deletion	Pathogenic
g.32339032del	c.4674delT	p.F1559Lfs	frameshift deletion	Pathogenic
g.32339039C>T	c.C4684T	p.Q1562X	stopgain	Pathogenic
g.32339044G>A	c.G4689A	p.W1563X	stopgain	Pathogenic
g.32339046dup	c.4691dupC	p.T1566Dfs	frameshift insertion	Pathogenic
g.32339049del	c.4692delA	p.K1565Rfs	frameshift deletion	Pathogenic
g.32339050_32339053dup	c.4694_4695insGACC	p.L1567Dfs	frameshift insertion	Pathogenic
g.32339055dup	c.4700dupT	p.Y1569Vfs	frameshift insertion	Pathogenic
g.32339062_32339063del	c.4706_4707del	p.Y1569fs	stopgain	Pathogenic
g.32339062C>A	c.C4707A	p.Y1569X	stopgain	Pathogenic
g.32339062C>G	c.C4707G	p.Y1569X	stopgain	Pathogenic
g.32339063_32339064AG	c.4708_4709del	p.E1571Gfs	frameshift deletion	Pathogenic
g.32339066_32339079del	c.4708_4721del	p.E1571Pfs	frameshift deletion	Pathogenic
g.32339065del	c.4710delA	p.E1571Rfs	frameshift deletion	Pathogenic
g.32339077dup	c.4720dupA	p.D1575Rfs	frameshift insertion	Pathogenic
g.32339077del	c.4720delA	p.D1575Tfs	frameshift deletion	Pathogenic
g.32339076_32339080del	c.4721_4725del	p.K1574Tfs	frameshift deletion	Pathogenic
g.32339078del	c.4723delG	p.D1575Tfs	frameshift deletion	Pathogenic
g.32339086dup	c.4730dupA	p.L1578Ifs	frameshift insertion	Pathogenic
g.32339086del	c.4730delA	p.E1577Dfs	frameshift deletion	Pathogenic
g.32339086_32339091delinsG	c.4731_4736G	p.L1578Mfs	frameshift substitution	Pathogenic
g.32339093_32339094TG	c.4737_4738insTG	p.E1581Vfs	frameshift insertion	Pathogenic
g.32339094dup	c.4739dupG	p.C1580Wfs	frameshift insertion	Pathogenic
g.32339096delinsAA	c.4741delinsAA	p.E1581Kfs	frameshift substitution	Pathogenic
g.32339097_32339098insTG	c.4742_4743insTG	p.E1581Dfs	frameshift insertion	Pathogenic
g.32339104del	c.4748delT	p.I1583Mfs	frameshift deletion	Pathogenic
g.32339121del	c.4763delC	p.P1589Qfs	frameshift deletion	Pathogenic
g.32339124del	c.4767delA	p.K1590Sfs	frameshift deletion	Pathogenic
g.32339123_32339124del	c.4767_4768del	p.K1590Vfs	frameshift deletion	Pathogenic
g.32339125_32339126GT	c.4770_4771del	p.C1591fs	frameshift deletion	Pathogenic
g.32339129A>T	c.A4774T	p.K1592X	stopgain	Pathogenic
g.32339135del	c.4778delA	p.M1594Cfs	frameshift deletion	Pathogenic
g.32339138C>T	c.C4783T	p.Q1595X	stopgain	Pathogenic
g.32339142del	c.4786delA	p.N1596Ifs	frameshift deletion	Pathogenic
g.32339149_32339152del	c.4793_4796del	p.N1599Mfs	frameshift deletion	Pathogenic
g.32339152del	c.4797delT	p.N1599Kfs	frameshift deletion	Pathogenic
g.32339154del	c.4798delA	p.N1600Mfs	frameshift deletion	Pathogenic
g.32339158dup	c.4803dupT	p.K1602fs	stopgain	Pathogenic
g.32339163dup	c.4804dupA	p.N1603Kfs	frameshift insertion	Pathogenic
g.32339163del	c.4804delA	p.N1603Tfs	frameshift deletion	Pathogenic
g.32339165dup	c.4809dupC	p.L1604Pfs	frameshift insertion	Pathogenic
g.32339164_32339165insA	c.4809_4810insA	p.L1604Tfs	frameshift insertion	Pathogenic
g.32339172_32339176del	c.4815_4819del	p.S1606fs	frameshift deletion	Pathogenic
g.32339176_32339177del	c.4821_4822del	p.E1608Dfs	frameshift deletion	Pathogenic
g.32339176_32339178delinsC	c.4821_4823C	p.E1608Dfs	frameshift substitution	Pathogenic
g.32339177_32339178GA	c.4822_4823del	p.E1608Dfs	frameshift deletion	Pathogenic
g.32339177G>T	c.G4822T	p.E1608X	stopgain	Likely_pathogenic
g.32339182_32339183TG	c.4827_4828del	p.V1610Gfs	frameshift deletion	Pathogenic
g.32339183dup	c.4828dupG	p.V1610Gfs	frameshift insertion	Pathogenic
g.32339198_32339199CT	c.4843_4844del	p.L1616Kfs	frameshift deletion	Pathogenic
g.32339203_32339206del	c.4847_4850del	p.S1617Ifs	frameshift deletion	Pathogenic
g.32339202T>G	c.T4847G	p.L1616X	stopgain	Pathogenic
g.32339203_32339204del	c.4848_4849del	p.S1617fs	frameshift deletion	Pathogenic
g.32339208delinsGCTCT	c.4853delinsGCTCT	p.D1618Gfs	frameshift substitution	Pathogenic
g.32339213_32339216del	c.4856_4859del	p.L1620Vfs	frameshift deletion	Likely_pathogenic
g.32339214_32339233del	c.4858_4877del	p.L1620Sfs	frameshift deletion	Pathogenic
g.32339214T>G	c.T4859G	p.L1620X	stopgain	Pathogenic
g.32339232dup	c.4874dupA	p.N1626Kfs	frameshift insertion	Pathogenic
g.32339231_32339232del	c.4874_4875del	p.N1626Sfs	frameshift deletion	Pathogenic
g.32339239_32339240del	c.4882_4883del	p.K1628Nfs	frameshift deletion	Pathogenic
g.32339244C>A	c.C4889A	p.S1630X	stopgain	Pathogenic
g.32339244C>G	c.C4889G	p.S1630X	stopgain	Pathogenic
g.32339249del	c.4890delA	p.S1632Vfs	frameshift deletion	Pathogenic
g.32339250_32339293del	c.4893_4936del	p.S1632Nfs	frameshift deletion	Pathogenic
g.32339249_32339250del	c.4894_4895del	p.S1632Yfs	frameshift deletion	Pathogenic
g.32339254_32339255del	c.4898_4899del	p.L1635Efs	frameshift deletion	Pathogenic
g.32339259dup	c.4900dupT	p.L1635Ffs	frameshift insertion	Pathogenic
g.32339258_32339259del	c.4900_4901del	p.L1635Efs	frameshift deletion	Pathogenic
g.32339259T>A	c.T4904A	p.L1635X	stopgain	Pathogenic
g.32339264del	c.4909delG	p.V1637Lfs	frameshift deletion	Pathogenic
g.32339269dup	c.4912dupA	p.V1639Sfs	frameshift insertion	Pathogenic
g.32339267A>T	c.A4912T	p.K1638X	stopgain	Pathogenic
g.32339272del	c.4917delA	p.H1640Mfs	frameshift deletion	Pathogenic
g.32339276_32339279del	c.4921_4924del	p.E1641Mfs	frameshift deletion	Pathogenic
g.32339276G>T	c.G4921T	p.E1641X	stopgain	Pathogenic/Likely_pathogenic
g.32339281_32339290del	c.4922_4931del	p.N1642Kfs	frameshift deletion	Pathogenic
g.32339282_32339283del	c.4926_4927del	p.V1643Rfs	frameshift deletion	Pathogenic
g.32339285_32339292del	c.4929_4936del	p.E1644Nfs	frameshift deletion	Pathogenic
g.32339290del	c.4931delA	p.E1646Kfs	frameshift deletion	Pathogenic
g.32339291_32339294del	c.4933_4936del	p.E1646Qfs	frameshift deletion	Pathogenic
g.32339288A>T	c.A4933T	p.K1645X	stopgain	Pathogenic
g.32339291_32339292del	c.4935_4936del	p.E1646Nfs	frameshift deletion	Pathogenic
g.32339291del	c.4936delG	p.E1646Kfs	frameshift deletion	Pathogenic
g.32339290_32339291delinsT	c.4935_4936T	p.K1645Nfs	frameshift substitution	Pathogenic
g.32339294dup	c.4937dupA	p.T1647Nfs	frameshift insertion	Pathogenic
g.32339291G>T	c.G4936T	p.E1646X	stopgain	Pathogenic
g.32339295_32339296del	c.4939_4940del	p.T1647Sfs	frameshift deletion	Pathogenic
g.32339295del	c.4940delC	p.T1647Kfs	frameshift deletion	Pathogenic
g.32339302_32339303del	c.4944_4945del	p.P1651Cfs	frameshift deletion	Pathogenic
g.32339304del	c.4949delG	p.S1650Ifs	frameshift deletion	Pathogenic
g.32339307del	c.4951delC	p.P1651Lfs	frameshift deletion	Pathogenic
g.32339315dup	c.4959dupT	p.C1654Lfs	frameshift insertion	Pathogenic
g.32339318del	c.4962delT	p.Y1655Tfs	frameshift deletion	Pathogenic
g.32339317T>A	c.T4962A	p.C1654X	stopgain	Pathogenic
g.32339319dup	c.4964dupA	p.Y1655fs	stopgain	Pathogenic
g.32339320del	c.4965delC	p.Y1655fs	stopgain	Pathogenic
g.32339320C>A	c.C4965A	p.Y1655X	stopgain	Pathogenic
g.32339320C>G	c.C4965G	p.Y1655X	stopgain	Pathogenic
g.32339320delinsGA	c.4965delinsGA	p.Y1655fs	stopgain	Pathogenic
g.32339327C>T	c.C4972T	p.Q1658X	stopgain	Pathogenic
g.32339329del	c.4974delG	p.Q1658Hfs	frameshift deletion	Pathogenic
g.32339330_32339331insG	c.4975_4976insG	p.S1659Cfs	frameshift insertion	Pathogenic
g.32339331_32339332insG	c.4976_4977insG	p.Y1661Lfs	frameshift insertion	Pathogenic
g.32339335_32339336dup	c.4979_4980insTT	p.Y1661Ffs	frameshift insertion	Pathogenic
g.32339336del	c.4980delT	p.Y1661Ifs	frameshift deletion	Pathogenic
g.32339335_32339336insG	c.4980_4981insG	p.Y1661Vfs	frameshift insertion	Pathogenic
g.32339336_32339337insG	c.4981_4982insG	p.Y1661fs	stopgain	Pathogenic
g.32339338_32339341del	c.4982_4985del	p.Y1661fs	stopgain	Likely_pathogenic
g.32339338T>G	c.T4983G	p.Y1661X	stopgain	Pathogenic
g.32339342_32339345del	c.4984_4987del	p.V1663Lfs	frameshift deletion	Pathogenic
g.32339340C>G	c.C4985G	p.S1662X	stopgain	Pathogenic
g.32339345_32339346del	c.4990_4991del	p.I1664fs	frameshift deletion	Pathogenic
g.32339354dup	c.4998dupT	p.S1667Ffs	frameshift insertion	Pathogenic
g.32339355C>G	c.C5000G	p.S1667X	stopgain	Pathogenic
g.32339361del	c.5005delT	p.L1669fs	stopgain	Pathogenic
g.32339361T>G	c.T5006G	p.L1669X	stopgain	Pathogenic
g.32339369dup	c.5010dupT	p.Y1672Lfs	frameshift insertion	Pathogenic
g.32339372dup	c.5017dupA	p.T1673Nfs	frameshift insertion	Pathogenic
g.32339371C>G	c.C5016G	p.Y1672X	stopgain	Pathogenic
g.32339380T>A	c.T5025A	p.C1675X	stopgain	Pathogenic
g.32339390dup	c.5031dupA	p.T1679Nfs	frameshift insertion	Pathogenic
g.32339390del	c.5031delA	p.T1679Lfs	frameshift deletion	Pathogenic
g.32339389_32339390del	c.5031_5032del	p.K1678Nfs	frameshift deletion	Pathogenic
g.32339394_32339395del	c.5038_5039del	p.S1680Cfs	frameshift deletion	Pathogenic
g.32339395_32339396TG	c.5040_5041del	p.V1681Efs	frameshift deletion	Pathogenic
g.32339400del	c.5045delG	p.S1682Ifs	frameshift deletion	Pathogenic
g.32339402C>T	c.C5047T	p.Q1683X	stopgain	Pathogenic
g.32339404_32339405del	c.5048_5049del	p.Q1683Hfs	frameshift deletion	Pathogenic
g.32339405_32339420del	c.5048_5063del	p.T1684Qfs	frameshift deletion	Pathogenic
g.32339404_32339405insT	c.5049_5050insT	p.T1684Yfs	frameshift insertion	Likely_pathogenic
g.32339409C>A	c.C5054A	p.S1685X	stopgain	Pathogenic
g.32339409C>G	c.C5054G	p.S1685X	stopgain	Pathogenic
g.32339412T>A	c.T5057A	p.L1686X	stopgain	Pathogenic
g.32339420_32339421delinsAAA	c.5065_5066AAA	p.A1689Kfs	frameshift substitution	Pathogenic
g.32339428dup	c.5067dupA	p.W1692Mfs	frameshift insertion	Pathogenic
g.32339428del	c.5067delA	p.K1691Nfs	frameshift deletion	Pathogenic
g.32339425_32339428del	c.5067_5070del	p.K1690Nfs	frameshift deletion	Pathogenic
g.32339426A>T	c.A5071T	p.K1691X	stopgain	Pathogenic
g.32339429_32339430insA	c.5074_5075insA	p.W1692fs	stopgain	Pathogenic
g.32339431del	c.5075delG	p.W1692Cfs	frameshift deletion	Pathogenic
g.32339430G>A	c.G5075A	p.W1692X	stopgain	Pathogenic
g.32339435A>T	c.A5080T	p.R1694X	stopgain	Pathogenic
g.32339440dup	c.5084dupA	p.G1696Rfs	frameshift insertion	Pathogenic
g.32339438G>T	c.G5083T	p.E1695X	stopgain	Pathogenic
g.32339441_32339442insA	c.5086_5087insA	p.G1696Efs	frameshift insertion	Pathogenic
g.32339442G>T	c.G5087T	p.G1696V	nonsynonymous SNV	Pathogenic
g.32339456C>T	c.C5101T	p.Q1701X	stopgain	Pathogenic
g.32339461_32339464AGAA	c.5106_5109del	p.R1704fs	frameshift deletion	Pathogenic
g.32339462G>T	c.G5107T	p.E1703X	stopgain	Pathogenic
g.32339465del	c.5108delA	p.R1704Efs	frameshift deletion	Pathogenic
g.32339465A>T	c.A5110T	p.R1704X	stopgain	Pathogenic
g.32339467_32339470AATA	c.5112_5115del	p.N1706Lfs	frameshift deletion	Pathogenic
g.32339470_32339474del	c.5115_5119del	p.N1706Cfs	frameshift deletion	Pathogenic
g.32339470_32339474delinsG	c.5115_5119G	p.I1705Mfs	frameshift substitution	Pathogenic
g.32339474dup	c.5119dupA	p.T1707Nfs	frameshift insertion	Pathogenic
g.32339474_32339477del	c.5119_5122del	p.T1707Qfs	frameshift deletion	Pathogenic
g.32339475del	c.5120delC	p.T1707Mfs	frameshift deletion	Pathogenic
g.32339480_32339484del	c.5124_5128del	p.D1709Cfs	frameshift deletion	Pathogenic
g.32339485_32339488del	c.5128_5131del	p.Y1710fs	frameshift deletion	Pathogenic
g.32339485del	c.5130delT	p.Y1710fs	stopgain	Pathogenic
g.32339485T>G	c.T5130G	p.Y1710X	stopgain	Pathogenic
g.32339486del	c.5131delG	p.V1711fs	stopgain	Pathogenic
g.32339487_32339490del	c.5131_5134del	p.V1711Efs	frameshift deletion	Pathogenic
g.32339489G>T	c.G5134T	p.G1712X	stopgain	Pathogenic
g.32339493del	c.5136delA	p.N1713Ifs	frameshift deletion	Pathogenic
g.32339496_32339499del	c.5139_5142del	p.Y1714Cfs	frameshift deletion	Pathogenic
g.32339501_32339504del	c.5144_5147del	p.Y1716Kfs	frameshift deletion	Pathogenic
g.32339504del	c.5149delG	p.E1717Kfs	frameshift deletion	Pathogenic
g.32339509_32339513del	c.5154_5158del	p.N1719Kfs	frameshift deletion	Pathogenic
g.32339512_32339516del	c.5155_5159del	p.N1719Kfs	frameshift deletion	Pathogenic
g.32339512_32339515del	c.5156_5159del	p.N1719Kfs	frameshift deletion	Pathogenic
g.32339513dup	c.5157dupT	p.S1720Ffs	frameshift insertion	Pathogenic
g.32339516_32339519del	c.5159_5162del	p.N1721Vfs	frameshift deletion	Pathogenic
g.32339514C>A	c.C5159A	p.S1720X	stopgain	Pathogenic
g.32339514C>G	c.C5159G	p.S1720X	stopgain	Pathogenic
g.32339517del	c.5160delA	p.N1721Tfs	frameshift deletion	Pathogenic
g.32339515_32339523delinsTACAA	c.5160_5168TACAA	p.N1721Tfs	frameshift substitution	Pathogenic
g.32339519_32339523dup	c.5161_5162insACAGT	p.I1724Vfs	frameshift insertion	Pathogenic
g.32339519_32339520del	c.5164_5165del	p.S1722Yfs	frameshift deletion	Pathogenic
g.32339521dup	c.5166dupT	p.T1723Yfs	frameshift insertion	Pathogenic
g.32339524_32339525TA	c.5168_5169insTA	p.A1725fs	frameshift insertion	Pathogenic
g.32339525dup	c.5170dupA	p.I1724Nfs	frameshift insertion	Pathogenic
g.32339526del	c.5171delT	p.I1724Kfs	frameshift deletion	Pathogenic
g.32339535dup	c.5177dupA	p.N1727Kfs	frameshift insertion	Pathogenic
g.32339535del	c.5177delA	p.N1727Mfs	frameshift deletion	Pathogenic
g.32339539_32339540del	c.5183_5184del	p.D1728Efs	frameshift deletion	Pathogenic
g.32339544del	c.5185delA	p.N1730Ifs	frameshift deletion	Pathogenic
g.32339546del	c.5191delC	p.H1731Ifs	frameshift deletion	Pathogenic
g.32339547_32339548del	c.5192_5193del	p.H1731Pfs	frameshift deletion	Pathogenic
g.32339548TC	c.5193_5194del	p.S1733Rfs	frameshift deletion	Pathogenic
g.32339550del	c.5195delT	p.L1732Pfs	frameshift deletion	Pathogenic
g.32339552dup	c.5197dupT	p.S1733Ffs	frameshift insertion	Pathogenic
g.32339553_32339554dup	c.5197_5198insCC	p.E1734Pfs	frameshift insertion	Pathogenic
g.32339555dup	c.5200dupG	p.E1734Gfs	frameshift insertion	Pathogenic/Likely_pathogenic
g.32339560dup	c.5201dupA	p.Q1736Tfs	frameshift insertion	Pathogenic
g.32339555G>T	c.G5200T	p.E1734X	stopgain	Pathogenic
g.32339560del	c.5201delA	p.K1735Nfs	frameshift deletion	Pathogenic
g.32339556_32339560delinsGAAAAG	c.5201_5205GAAAAG	p.E1734Gfs	frameshift substitution	Pathogenic
g.32339560_32339563del	c.5203_5206del	p.Q1736Ifs	frameshift deletion	Pathogenic
g.32339564_32339628dup	c.5206_5207insAAGATACTTATTTAAGTAACAGTAGCATGTCTAACAGCTATTCCTACCATTCTGATGAGGTATAT	p.N1758Kfs	frameshift insertion	Pathogenic
g.32339561C>T	c.C5206T	p.Q1736X	stopgain	Pathogenic
g.32339563del	c.5207delA	p.D1737Ifs	frameshift deletion	Pathogenic
g.32339562_32339563del	c.5207_5208del	p.Q1736Rfs	frameshift deletion	Pathogenic
g.32339568_32339571del	c.5211_5214del	p.T1738fs	frameshift deletion	Pathogenic
g.32339567dup	c.5212dupA	p.T1738Nfs	frameshift insertion	Pathogenic
g.32339568del	c.5213delC	p.T1738Ifs	frameshift deletion	Pathogenic
g.32339570del	c.5214delT	p.Y1739fs	frameshift deletion	Pathogenic
g.32339572_32339575del	c.5214_5217del	p.Y1739fs	frameshift deletion	Pathogenic
g.32339571_32339572insAATA	c.5214_5215insTAAA	p.Y1739fs	stopgain	Likely_pathogenic
g.32339572_32339579del	c.5215_5222del	p.Y1739fs	frameshift deletion	Pathogenic
g.32339571dup	c.5216dupA	p.Y1739fs	stopgain	Pathogenic
g.32339571_32339572insAAA	c.5215_5216insAAA	p.Y1739_I3418del	stopgain	Pathogenic
g.32339572_32339576del	c.5216_5220del	p.Y1739fs	stopgain	Pathogenic
g.32339573_32339589del	c.5216_5232del	p.L1740Vfs	frameshift deletion	Pathogenic
g.32339574dup	c.5217dupT	p.L1740Ffs	frameshift insertion	Pathogenic
g.32339574del	c.5217delT	p.L1740fs	frameshift deletion	Pathogenic
g.32339572_32339578del	c.5217_5223del	p.Y1739fs	stopgain	Pathogenic
g.32339572T>A	c.T5217A	p.Y1739X	stopgain	Pathogenic
g.32339572_32339573delinsA	c.5217_5218A	p.Y1739fs	stopgain	Pathogenic
g.32339573_32339579del	c.5218_5224del	p.L1740Tfs	frameshift deletion	Pathogenic
g.32339574_32339575dup	c.5218_5219insTA	p.S1741fs	frameshift insertion	Pathogenic
g.32339577_32339580del	c.5219_5222del	p.S1741Tfs	frameshift deletion	Pathogenic
g.32339574T>G	c.T5219G	p.L1740X	stopgain	Likely_pathogenic
g.32339574_32339575insTA	c.5219_5220insTA	p.L1740Ffs	frameshift insertion	Pathogenic
g.32339576_32339580delinsC	c.5221_5225C	p.S1741Pfs	frameshift substitution	Pathogenic
g.32339578dup	c.5223dupT	p.N1742fs	stopgain	Likely_pathogenic
g.32339581del	c.5226delC	p.N1742Kfs	frameshift deletion	Pathogenic
g.32339585_32339589del	c.5229_5233del	p.S1744Vfs	frameshift deletion	Pathogenic
g.32339592_32339593dup	c.5235_5236insTC	p.N1747Lfs	frameshift insertion	Pathogenic
g.32339591del	c.5236delT	p.S1746Lfs	frameshift deletion	Pathogenic
g.32339593dup	c.5238dupT	p.N1747fs	stopgain	Pathogenic
g.32339595_32339596insTA	c.5239_5240insAT	p.S1748Tfs	frameshift insertion	Pathogenic
g.32339594_32339595insT	c.5239_5240insT	p.N1747Ifs	frameshift insertion	Pathogenic
g.32339596del	c.5241delC	p.N1747Kfs	frameshift deletion	Pathogenic
g.32339596_32339597insTA	c.5241_5242insTA	p.S1748fs	stopgain	Pathogenic
g.32339602T>A	c.T5247A	p.Y1749X	stopgain	Pathogenic
g.32339602T>G	c.T5247G	p.Y1749X	stopgain	Pathogenic/Likely_pathogenic
g.32339605del	c.5249delC	p.Y1751Tfs	frameshift deletion	Pathogenic
g.32339609del	c.5253delC	p.H1752Ifs	frameshift deletion	Pathogenic
g.32339608C>A	c.C5253A	p.Y1751X	stopgain	Pathogenic
g.32339618G>T	c.G5263T	p.E1755X	stopgain	Pathogenic
g.32339621_32339624del	c.5266_5269del	p.V1756Ifs	frameshift deletion	Pathogenic
g.32339625_32339641del	c.5267_5283del	p.Y1757Sfs	frameshift deletion	Pathogenic
g.32339625_32339628del	c.5270_5273del	p.Y1757Lfs	frameshift deletion	Pathogenic
g.32339626T>A	c.T5271A	p.Y1757X	stopgain	Pathogenic
g.32339633dup	c.5277dupT	p.S1760Ffs	frameshift insertion	Pathogenic
g.32339634C>A	c.C5279A	p.S1760X	stopgain	Pathogenic
g.32339634C>G	c.C5279G	p.S1760X	stopgain	Pathogenic
g.32339636G>T	c.G5281T	p.G1761X	stopgain	Pathogenic
g.32339641_32339642TC	c.5286_5287del	p.S1764Kfs	frameshift deletion	Pathogenic
g.32339641T>A	c.T5286A	p.Y1762X	stopgain	Pathogenic
g.32339641T>G	c.T5286G	p.Y1762X	stopgain	Pathogenic
g.32339652dup	c.5292dupA	p.N1766Kfs	frameshift insertion	Pathogenic
g.32339646C>G	c.C5291G	p.S1764X	stopgain	Pathogenic
g.32339648A>T	c.A5293T	p.K1765X	stopgain	Pathogenic
g.32339653_32339656del	c.5295_5298del	p.K1767Lfs	frameshift deletion	Pathogenic
g.32339653del	c.5298delT	p.N1766Kfs	frameshift deletion	Pathogenic
g.32339659del	c.5303delT	p.D1769Ifs	frameshift deletion	Pathogenic
g.32339658_32339659del	c.5303_5304del	p.L1768Rfs	frameshift deletion	Pathogenic
g.32339658_32339666delinsA	c.5303_5311A	p.L1768Qfs	frameshift substitution	Pathogenic
g.32339663del	c.5307delT	p.S1770Lfs	frameshift deletion	Pathogenic
g.32339672G>T	c.G5317T	p.E1773X	stopgain	Pathogenic
g.32339682dup	c.5326dupT	p.L1776Ffs	frameshift insertion	Pathogenic
g.32339683_32339684insT	c.5328_5329insT	p.K1777fs	stopgain	Pathogenic
g.32339684_32339689delinsG	c.5329_5334G	p.K1777Gfs	frameshift substitution	Pathogenic
g.32339689_32339695del	c.5331_5337del	p.N1778Kfs	frameshift deletion	Pathogenic
g.32339693dup	c.5338dupG	p.E1780Gfs	frameshift insertion	Pathogenic
g.32339693del	c.5338delG	p.E1780Kfs	frameshift deletion	Pathogenic
g.32339697dup	c.5342dupA	p.D1781Efs	frameshift insertion	Pathogenic
g.32339698_32339699insA	c.5343_5344insA	p.Q1782Tfs	frameshift insertion	Pathogenic
g.32339699del	c.5344delC	p.Q1782Kfs	frameshift deletion	Pathogenic
g.32339699_32339700del	c.5344_5345del	p.Q1782Kfs	frameshift deletion	Pathogenic
g.32339706dup	c.5345dupA	p.N1784Kfs	frameshift insertion	Pathogenic
g.32339705_32339706dup	c.5344_5345insAA	p.N1784Kfs	frameshift insertion	Pathogenic
g.32339699C>T	c.C5344T	p.Q1782X	stopgain	Pathogenic
g.32339706del	c.5345delA	p.N1784Tfs	frameshift deletion	Pathogenic
g.32339705_32339706del	c.5345_5346del	p.N1784Hfs	frameshift deletion	Pathogenic
g.32339705_32339708del	c.5349_5352del	p.N1784Lfs	frameshift deletion	Pathogenic
g.32339705_32339706delinsT	c.5350_5351T	p.N1784Sfs	frameshift substitution	Pathogenic
g.32339706_32339707AC	c.5351_5352del	p.T1785fs	frameshift deletion	Pathogenic
g.32339707dup	c.5352dupC	p.T1785Hfs	frameshift insertion	Pathogenic
g.32339707del	c.5352delC	p.N1784Kfs	frameshift deletion	Pathogenic
g.32339708dup	c.5353dupA	p.T1785Nfs	frameshift insertion	Pathogenic
g.32339708del	c.5353delA	p.T1785Lfs	frameshift deletion	Pathogenic
g.32339710dup	c.5355dupT	p.S1786fs	stopgain	Pathogenic
g.32339710_32339711del	c.5355_5356del	p.S1786Ffs	frameshift deletion	Pathogenic
g.32339712del	c.5357delG	p.S1786Ifs	frameshift deletion	Pathogenic
g.32339717dup	c.5358dupT	p.S1788Ffs	frameshift insertion	Pathogenic
g.32339719dup	c.5363dupC	p.K1789Qfs	frameshift insertion	Pathogenic
g.32339717_32339718delinsA	c.5362_5363A	p.S1788Tfs	frameshift substitution	Pathogenic/Likely_pathogenic
g.32339720A>T	c.A5365T	p.K1789X	stopgain	Pathogenic
g.32339726_32339727AT	c.5371_5372del	p.S1792Qfs	frameshift deletion	Pathogenic
g.32339733del	c.5377delA	p.N1793Mfs	frameshift deletion	Pathogenic
g.32339734_32339735insTT	c.5378_5379insTT	p.V1794Lfs	frameshift insertion	Pathogenic
g.32339734del	c.5379delT	p.N1793Kfs	frameshift deletion	Pathogenic
g.32339735del	c.5380delG	p.V1794fs	stopgain	Pathogenic
g.32339740dup	c.5382dupA	p.D1796Rfs	frameshift insertion	Pathogenic
g.32339741_32339742del	c.5385_5386del	p.D1796Cfs	frameshift deletion	Pathogenic
g.32339741del	c.5386delG	p.D1796Mfs	frameshift deletion	Pathogenic
g.32339743dup	c.5388dupT	p.A1797Cfs	frameshift insertion	Pathogenic
g.32339744_32339745del	c.5389_5390del	p.A1797Kfs	frameshift deletion	Pathogenic
g.32339745del	c.5390delC	p.A1797Efs	frameshift deletion	Pathogenic
g.32339755C>G	c.C5400G	p.Y1800X	stopgain	Pathogenic
g.32339757_32339758CA	c.5402_5403del	p.Q1802Nfs	frameshift deletion	Pathogenic
g.32339759C>T	c.C5404T	p.Q1802X	stopgain	Pathogenic
g.32339765_32339766del	c.5409_5410del	p.V1804Kfs	frameshift deletion	Pathogenic
g.32339770dup	c.5415dupT	p.E1806fs	stopgain	Pathogenic
g.32339771_32339772insT	c.5416_5417insT	p.E1806Vfs	frameshift insertion	Pathogenic
g.32339775_32339776AT	c.5420_5421del	p.I1808Lfs	frameshift deletion	Pathogenic
g.32339780del	c.5423delT	p.C1809Afs	frameshift deletion	Pathogenic
g.32339782C>A	c.C5427A	p.C1809X	stopgain	Pathogenic
g.32339788_32339791del	c.5432_5435del	p.E1811Dfs	frameshift deletion	Pathogenic
g.32339789G>T	c.G5434T	p.E1812X	stopgain	Pathogenic
g.32339791del	c.5435delA	p.E1812Dfs	frameshift deletion	Pathogenic
g.32339794del	c.5438delT	p.V1814fs	frameshift deletion	Pathogenic
g.32339797_32339800dup	c.5440_5441insTGAC	p.S1816Dfs	frameshift insertion	Pathogenic
g.32339808C>A	c.C5453A	p.S1818X	stopgain	Pathogenic
g.32339809del	c.5454delA	p.C1820Afs	frameshift deletion	Pathogenic
g.32339814_32339815dup	c.5458_5459insGC	p.K1821Afs	frameshift insertion	Pathogenic
g.32339820dup	c.5461dupA	p.N1822Kfs	frameshift insertion	Pathogenic
g.32339820del	c.5461delA	p.N1822Ifs	frameshift deletion	Pathogenic
g.32339821dup	c.5466dupT	p.K1823fs	stopgain	Pathogenic
g.32339826dup	c.5467dupA	p.N1824Kfs	frameshift insertion	Pathogenic
g.32339826del	c.5467delA	p.N1824Mfs	frameshift deletion	Pathogenic
g.32339825_32339826del	c.5467_5468del	p.N1824Cfs	frameshift deletion	Pathogenic
g.32339827dup	c.5472dupT	p.A1825Cfs	frameshift insertion	Pathogenic
g.32339827_32339828insA	c.5472_5473insA	p.A1825Sfs	frameshift insertion	Pathogenic
g.32339837_32339841del	c.5479_5483del	p.K1828Vfs	frameshift deletion	Pathogenic
g.32339834_32339837delinsTTT	c.5479_5482TTT	p.I1827Ffs	frameshift substitution	Pathogenic
g.32339841del	c.5485delT	p.L1829Cfs	frameshift deletion	Pathogenic
g.32339842_32339843del	c.5486_5487del	p.L1829Ffs	frameshift deletion	Likely_pathogenic
g.32339847dup	c.5492dupT	p.S1832fs	frameshift insertion	Pathogenic
g.32339851dup	c.5496dupT	p.N1833fs	stopgain	Pathogenic
g.32339853del	c.5497delA	p.N1833Ifs	frameshift deletion	Pathogenic
g.32339867G>T	c.G5512T	p.E1838X	stopgain	Pathogenic
g.32339880del	c.5524delC	p.P1842Lfs	frameshift deletion	Pathogenic
g.32339881del	c.5526delT	p.A1843Hfs	frameshift deletion	Pathogenic
g.32339897del	c.5542delA	p.S1848Vfs	frameshift deletion	Pathogenic
g.32339902_32339903del	c.5547_5548del	p.K1850Nfs	frameshift deletion	Pathogenic
g.32339906del	c.5548delA	p.I1851Sfs	frameshift deletion	Pathogenic
g.32339905_32339906del	c.5548_5549del	p.K1850Nfs	frameshift deletion	Pathogenic
g.32339905_32339921delinsTTGGCT	c.5550_5566TTGGCT	p.K1850Nfs	frameshift substitution	Pathogenic
g.32339909_32339915del	c.5554_5560del	p.V1852Ffs	frameshift deletion	Pathogenic
g.32339912dup	c.5555dupT	p.C1853Lfs	frameshift insertion	Pathogenic
g.32339912del	c.5555delT	p.C1853Vfs	frameshift deletion	Pathogenic
g.32339913_32339914GT	c.5557_5558del	p.V1854Ffs	frameshift deletion	Pathogenic
g.32339919C>A	c.C5564A	p.S1855X	stopgain	Pathogenic
g.32339924_32339928del	c.5569_5573del	p.E1857Nfs	frameshift deletion	Pathogenic
g.32339924G>T	c.G5569T	p.E1857X	stopgain	Pathogenic
g.32339931_32339934del	c.5574_5577del	p.I1859Kfs	frameshift deletion	Pathogenic
g.32339932del	c.5576delT	p.V1862fs	frameshift deletion	Pathogenic
g.32339932_32339935del	c.5577_5580del	p.K1861fs	frameshift deletion	Pathogenic
g.32339938dup	c.5578dupA	p.V1862Sfs	frameshift insertion	Pathogenic
g.32339938del	c.5578delA	p.V1862fs	frameshift deletion	Pathogenic
g.32339935_32339938del	c.5578_5581del	p.K1861fs	frameshift deletion	Pathogenic
g.32339933A>T	c.A5578T	p.K1860X	stopgain	Pathogenic
g.32339935_32339939del	c.5580_5584del	p.K1860Nfs	frameshift deletion	Pathogenic
g.32339939_32339942del	c.5583_5586del	p.V1862Kfs	frameshift deletion	Pathogenic
g.32339940_32339943del	c.5585_5588del	p.V1862Efs	frameshift deletion	Pathogenic
g.32339945_32339946del	c.5589_5590del	p.D1864Hfs	frameshift deletion	Pathogenic
g.32339945_32339948del	c.5589_5592del	p.D1864Yfs	frameshift deletion	Pathogenic
g.32339947_32339948del	c.5591_5592del	p.F1866Yfs	frameshift deletion	Pathogenic
g.32339948del	c.5593delA	p.I1865Yfs	frameshift deletion	Pathogenic
g.32339948_32339949AT	c.5593_5594del	p.F1866Yfs	frameshift deletion	Pathogenic
g.32339950_32339951delinsC	c.5595_5596C	p.F1866Lfs	frameshift substitution	Pathogenic
g.32339954_32339957ACAG	c.5599_5602del	p.D1868Vfs	frameshift deletion	Pathogenic
g.32339959_32339960del	c.5603_5604del	p.D1868Efs	frameshift deletion	Pathogenic
g.32339961_32339962insC	c.5606_5607insC	p.S1871Qfs	frameshift insertion	Pathogenic
g.32339964dup	c.5607dupT	p.S1871Qfs	frameshift insertion	Pathogenic
g.32339962_32339963insC	c.5607_5608insC	p.F1870Lfs	frameshift insertion	Pathogenic
g.32339964_32339965delinsAG	c.5609_5610AG	p.F1870_I3418del	stopgain	Pathogenic
g.32339966_32339970AGTAA	c.5611_5615del	p.K1872Nfs	frameshift deletion	Pathogenic
g.32339968del	c.5613delT	p.S1871Rfs	frameshift deletion	Likely_pathogenic
g.32339971del	c.5614delA	p.V1873fs	frameshift deletion	Pathogenic
g.32339969A>T	c.A5614T	p.K1872X	stopgain	Pathogenic
g.32339972_32339976del	c.5617_5621del	p.V1873fs	frameshift deletion	Pathogenic
g.32339976_32339979del	c.5618_5621del	p.I1874Rfs	frameshift deletion	Pathogenic
g.32339973_32339977del	c.5618_5622del	p.V1873Efs	frameshift deletion	Pathogenic
g.32339977_32339983del	c.5622_5628del	p.K1875Tfs	frameshift deletion	Pathogenic
g.32339979del	c.5623delA	p.K1875Rfs	frameshift deletion	Pathogenic
g.32339978A>T	c.A5623T	p.K1875X	stopgain	Pathogenic
g.32339981G>T	c.G5626T	p.E1876X	stopgain	Pathogenic
g.32339985del	c.5627delA	p.N1877Tfs	frameshift deletion	Pathogenic
g.32339986del	c.5631delC	p.N1877Kfs	frameshift deletion	Pathogenic
g.32339990G>T	c.G5635T	p.E1879X	stopgain	Pathogenic
g.32339996_32339999del	c.5638_5641del	p.K1881Qfs	frameshift deletion	Pathogenic
g.32339999_32340002del	c.5642_5645del	p.S1882Kfs	frameshift deletion	Pathogenic
g.32340000C>A	c.C5645A	p.S1882X	stopgain	Pathogenic
g.32340005dup	c.5646dupA	p.I1884Nfs	frameshift insertion	Pathogenic
g.32340000C>G	c.C5645G	p.S1882X	stopgain	Pathogenic
g.32340005_32340014del	c.5647_5656del	p.I1884Rfs	frameshift deletion	Pathogenic
g.32340008dup	c.5651dupT	p.C1885Lfs	frameshift insertion	Pathogenic
[truncated: 1,655 more rows]
