# Supplementary material for: Human BRCA pathogenic variants were originated during recent human history
Source: Life Sci Alliance. 2022 Feb 14;5(5):e202101263. doi: 10.26508/lsa.202101263 (PMC8860097; doi:10.26508/lsa.202101263)
Supplement: Supplementary file 3 [file LSA-2021-01263_TableS3.xlsx]

## Sheet: All_172_shared_variants
Supplementary table 3. Human BRCA1 PLPs shared with other species
		(hg38) NC_000017.11	g.43045767G>A	g.43049174G>A	g.43071104G>A	g.43071173C>A	g.43074330C>A	g.43074388C>A	g.43074394G>A	g.43074397G>A	g.43074403C>A	g.43074433G>A	g.43074454G>A	g.43076540C>A	g.43076573G>A	g.43082422G>A	g.43082434G>A	g.43091030C>A	g.43091456G>A	g.43091459C>A	g.43091477C>A	g.43091498C>A	g.43091516C>A	g.43091540G>A	g.43091552G>A	g.43091594G>A	g.43091627C>A	g.43091690G>A	g.43091759C>A	g.43091813G>A	g.43091894C>A	g.43091912T>A	g.43091933G>A	g.43091987G>A	g.43092101G>A	g.43092119C>A	g.43092200G>A	g.43092212C>A	g.43092263G>A	g.43092482C>A	g.43092617C>A	g.43092656T>A	g.43092662G>A	g.43092731G>A	g.43092770G>A	g.43092791C>A	g.43092803G>A	g.43092809C>A	g.43092812C>A
		ClinVar Allele ID	70268	70213	69958	69943	184911	69907	69906	69904	69903	261638	69893	235966	69858	69840	32714	184938	69765	102827	97097	261685	46115	46114	235987	46112	69712	69689	69667	69645	424815	69605	69596	69580	69550	261739	69512	69503	69482	69431	69382	536493	69370	69350	69340	69334	69329	69324	236061
		Species with mutation Number of shared variants	5	2	2	1	1	2	2	6	2	1	1	1	1	5	3	1	1	1	1	4	1	1	7	1	5	6	5	2	1	1	3	5	3	1	5	1	19	1	7	5	10	1	5	9	6	5	1
Primate 2	Human (Alt)		a	a	a	a	a	a	a	a	a	a	a	a	a	a	a	a	a	a	a	a	a	a	a	a	a	a	a	a	a	a	a	a	a	a	a	a	a	a	a	a	a	a	a	a	a	a	a
	Human (Ref hg38)		g	g	g	c	c	c	g	g	c	g	g	c	g	g	g	c	g	c	c	c	c	g	g	g	c	g	c	g	c	t	g	g	g	c	g	c	g	c	c	t	g	g	g	c	g	c	c
	Chimp		g	g	g	c	c	c	g	g	c	g	g	c	g	g	g	c	g	c	c	c	c	g	g	g	c	g	c	g	c	t	g	g	g	c	g	c	g	c	c	t	g	g	g	c	g	g	c
	Gorilla		g	g	g	c	=	=	=	=	=	=	=	c	g	g	g	c	g	c	c	c	c	g	g	g	c	g	c	g	c	t	g	g	g	c	g	c	g	c	c	t	g	g	g	c	g	c	c
	Orangutan		g	g	g	c	c	c	g	g	c	g	g	c	g	g	g	c	g	c	c	c	c	g	g	g	c	g	c	g	c	t	g	g	g	t	g	c	g	c	c	t	g	g	g	c	g	c	c
	Gibbon		g	g	g	c	c	c	g	g	c	g	g	c	g	g	g	c	g	c	c	c	c	g	g	g	c	g	c	g	c	t	g	g	g	c	g	c	g	c	c	t	g	g	g	t	g	c	c
	Rhesus		g	g	g	c	c	c	g	g	c	g	g	c	g	g	g	c	g	c	c	c	c	g	g	g	c	g	c	g	c	t	g	g	c	c	g	c	g	c	c	t	g	g	g	c	g	c	c
	Crab-eating macaque		g	g	g	c	c	c	g	g	c	g	g	c	g	g	g	c	g	c	c	c	c	g	g	g	c	g	c	g	c	t	g	g	c	c	g	c	g	c	c	t	g	g	g	c	g	c	c
	Baboon		g	g	g	c	c	c	g	g	c	g	g	c	g	g	g	c	g	c	c	c	c	g	g	g	c	g	c	g	c	t	g	g	c	c	g	c	g	c	c	t	g	g	g	c	g	c	c
	Green monkey		g	g	g	c	c	c	g	g	c	g	g	c	g	g	g	c	g	c	c	c	c	g	g	g	c	g	c	g	c	t	g	g	c	c	g	c	g	c	c	t	g	g	g	c	g	c	c
	Marmoset	1	g	g	g	c	c	c	g	g	c	g	g	c	g	g	g	c	g	c	c	c	c	g	g	g	c	g	c	g	c	t	g	g	g	c	g	c	g	t	c	t	g	g	c	c	g	c	c
	Squirrel monkey		g	g	N	N	c	c	g	g	c	g	g	c	g	g	g	c	g	c	c	c	c	g	g	g	c	g	c	g	c	t	g	g	g	c	g	c	g	t	c	t	g	g	c	c	g	c	c
	Bushbaby	1	g	g	g	c	c	c	t	g	t	g	g	g	g	t	g	c	g	c	c	c	c	g	g	g	c	g	c	g	c	t	g	t	g	t	g	t	g	c	c	g	g	g	g	c	g	c	-
Euarchontoglires 81	Chinese tree shrew	4	g	g	g	c	c	c	g	g	c	g	-	g	g	g	g	c	g	c	c	c	c	g	a	g	c	g	c	g	-	g	c	g	g	c	g	c	g	c	c	t	g	g	g	c	g	c	c
	Squirrel	3	t	g	g	c	c	t	c	g	c	g	g	a	g	g	g	c	g	c	c	c	t	g	g	g	c	g	c	g	c	t	g	g	g	t	g	c	g	t	c	t	g	g	g	c	a	c	t
	Lesser Egyptian jerboa	7	g	g	g	-	c	-	g	a	g	c	g	g	g	g	g	c	a	c	c	c	c	g	g	g	a	g	-	g	c	t	g	g	g	t	g	c	g	c	c	t	g	g	-	c	-	c	t
	Prairie vole	4	a	g	c	t	c	-	g	a	c	g	g	g	g	g	g	c	c	c	c	c	c	c	g	g	c	g	c	-	c	t	g	g	g	c	g	c	g	c	c	t	g	g	g	c	g	c	t
	Chinese hamster	7	a	g	g	t	a	-	c	a	c	g	g	g	g	g	g	c	c	c	c	c	c	c	g	g	c	g	c	=	c	t	g	g	g	c	g	c	g	c	-	t	g	g	g	c	g	c	c
	Golden hamster	5	a	g	g	t	c	-	c	a	c	g	g	g	g	g	g	=	c	c	c	c	c	c	g	g	c	g	c	=	c	t	g	g	g	c	g	c	g	c	c	t	g	g	g	c	g	c	c
	Mouse	8	a	g	g	t	c	-	a	a	c	g	g	g	g	g	g	c	c	c	c	c	c	c	g	g	c	g	c	=	c	t	g	g	g	t	g	c	g	c	c	t	g	g	g	c	g	c	t
	Rat	7	a	g	g	t	c	-	a	a	c	g	g	g	g	g	g	c	c	c	c	c	c	c	g	g	c	g	c	=	c	t	g	g	g	t	g	c	g	c	c	t	g	g	g	c	g	c	t
	Naked mole-rat	5	t	g	g	c	c	c	g	c	-	g	t	g	g	g	c	c	g	c	c	c	c	g	g	g	t	g	c	g	c	t	g	g	g	c	g	t	g	c	c	t	g	g	g	c	t	t	c
	Guinea pig	10	t	g	g	t	c	c	g	c	c	g	g	g	g	g	g	c	g	c	c	c	c	g	a	g	c	g	c	g	g	g	g	g	g	c	g	c	g	g	c	c	g	-	g	-	-	-	c
	Chinchilla	6	t	g	g	c	c	c	g	c	c	g	g	g	g	a	g	c	g	c	c	c	c	g	g	g	c	g	c	g	c	t	g	g	g	c	g	c	g	c	c	c	g	g	g	c	g	c	a
	Brush-tailed rat	8	t	g	g	t	c	c	g	c	t	a	c	g	g	a	g	c	c	c	c	c	c	g	g	g	c	g	c	g	c	t	g	g	g	c	g	c	g	c	c	t	g	g	g	c	g	c	c
	Rabbit	2	t	g	g	c	c	c	g	g	c	g	g	g	g	g	g	c	g	c	-	c	c	g	g	g	c	g	c	g	c	t	g	g	g	c	g	t	g	c	c	t	g	g	g	c	g	c	c
	Pika	5	t	g	c	c	c	c	g	g	c	g	g	g	g	g	g	c	g	c	c	c	c	g	c	g	c	g	c	g	c	c	g	g	g	c	g	c	g	c	c	t	g	g	g	c	g	c	c
Laurasiatheria 62	Pig	2	g	g	g	c	c	t	g	g	c	g	g	g	g	g	g	c	g	c	c	c	c	g	g	g	c	g	c	g	c	t	g	g	g	c	g	c	g	c	c	t	g	g	g	c	g	c	c
	Alpaca		g	g	g	c	c	t	g	g	c	g	g	t	g	g	g	c	g	c	c	c	c	g	g	g	c	g	c	g	c	t	g	g	g	c	g	c	g	c	c	t	g	g	g	t	g	c	c
	Bactrian camel		g	g	g	c	c	t	g	g	c	g	g	t	g	g	g	c	g	c	c	c	c	g	g	g	c	g	c	g	c	c	g	g	g	c	g	c	g	c	c	t	g	g	g	t	g	c	c
	Dolphin	2	g	g	g	c	c	t	g	g	c	g	g	g	g	g	g	c	g	c	c	c	c	g	g	g	c	c	c	g	c	c	g	g	g	c	g	c	g	c	c	t	g	g	a	c	g	c	c
	Killer whale	1	g	g	g	c	c	t	g	g	c	g	g	g	g	g	g	c	g	c	c	c	c	g	g	g	c	g	c	g	c	c	g	g	g	c	g	c	g	c	c	t	g	g	g	c	g	c	c
	Tibetan antelope	1	g	g	g	c	c	c	g	g	c	g	g	g	g	g	g	c	g	c	c	c	c	c	g	g	c	g	c	g	c	c	g	g	g	c	g	c	g	c	c	t	g	g	g	c	g	c	c
	Cow	1	g	g	g	c	c	c	g	g	c	g	g	g	g	g	g	c	g	c	c	c	c	c	g	g	c	g	c	g	c	c	g	g	g	c	g	c	g	c	c	t	g	g	g	c	g	c	c
	Sheep	1	g	g	g	c	c	c	g	g	g	g	g	g	g	g	g	c	g	c	c	c	c	c	g	g	c	g	c	g	c	c	g	g	g	c	g	c	g	c	c	t	g	g	g	c	g	c	c
	Domestic goat	2	g	g	g	c	c	c	g	g	g	g	g	g	g	g	g	c	g	c	c	c	c	c	g	g	c	g	c	g	c	c	g	g	g	c	g	c	g	c	c	t	g	g	g	c	a	c	c
	Horse	1	g	g	g	c	c	t	g	g	c	g	g	g	g	g	g	c	g	c	c	c	c	g	g	g	c	g	c	g	c	t	g	g	g	c	g	c	g	c	c	t	g	g	g	c	c	c	c
	White rhinoceros		g	g	g	c	c	t	g	g	c	g	g	g	g	g	g	c	g	c	c	c	c	g	g	g	c	g	c	g	c	t	g	g	g	c	g	c	g	t	c	t	g	g	g	c	g	c	c
	Cat	6	g	g	g	c	c	t	g	g	c	g	g	g	g	g	a	c	g	c	c	c	c	c	g	g	c	g	c	g	c	t	g	g	g	c	g	c	g	c	c	t	g	g	g	g	g	c	c
	Dog	3	g	g	g	a	c	t	g	g	c	g	g	g	g	g	g	c	g	c	c	c	c	g	g	g	c	g	c	g	c	t	g	g	g	c	g	c	g	c	c	t	g	g	g	c	g	c	c
	Ferret	3	g	g	g	t	c	t	g	g	c	g	g	g	g	g	g	c	g	-	c	c	c	g	g	g	c	g	c	g	c	t	g	g	g	c	g	c	g	c	c	t	g	g	g	c	g	-	c
	Panda	3	g	g	g	c	c	t	c	g	c	g	g	g	g	g	g	c	g	-	c	c	c	g	g	g	c	g	c	g	c	t	g	g	g	c	g	c	g	c	c	t	g	g	g	c	g	c	c
	Pacific walrus	2	g	g	g	t	c	t	g	g	c	g	g	g	g	g	g	c	g	c	c	c	c	g	g	g	c	g	c	g	c	t	g	g	g	c	g	c	g	c	c	t	g	g	g	c	g	c	c
	Weddell seal	4	g	g	g	t	c	t	g	g	c	g	g	g	g	=	=	c	g	c	c	c	c	g	g	g	c	g	c	g	c	t	g	g	g	c	g	c	g	c	c	t	g	g	g	c	g	c	c
	Black flying-fox	4	g	g	g	c	t	t	g	g	a	g	g	g	g	g	g	c	g	c	c	c	c	g	g	g	c	g	c	a	c	t	g	g	g	c	g	c	g	c	c	t	g	c	g	c	g	-	c
	Megabat	4	g	g	g	c	t	t	g	g	a	g	g	g	g	g	g	c	g	c	c	c	c	g	g	g	c	g	c	a	c	t	g	g	g	c	g	c	g	c	=	=	=	=	=	=	=	=	=
	Big brown bat	2	g	g	g	c	c	c	g	g	c	g	g	g	g	g	g	c	g	c	c	c	c	g	g	g	c	g	c	g	c	t	g	g	g	c	g	c	g	c	c	t	g	c	g	c	g	c	c
	David's myotis (bat)	2	t	g	g	c	c	t	g	g	c	g	g	g	g	g	g	c	g	c	c	c	c	g	g	g	c	g	c	g	c	t	g	g	g	c	g	c	g	c	c	t	g	c	g	c	g	c	c
	Microbat	2	g	g	g	c	c	t	g	g	c	g	g	g	g	g	g	c	g	c	c	c	c	g	g	g	c	g	c	g	c	t	g	g	g	c	g	c	g	c	c	t	g	c	g	c	g	c	c
	Hedgehog	9	g	a	-	c	c	t	g	g	c	g	g	g	g	g	g	c	g	c	c	c	c	c	g	g	t	g	c	g	c	g	g	g	-	c	g	c	g	t	a	t	g	a	g	c	g	c	c
	Shrew	4	g	g	g	c	c	t	g	g	t	g	-	g	g	g	g	t	g	c	c	c	-	g	g	a	c	g	c	g	c	t	g	g	-	c	g	c	g	c	a	t	c	g	g	c	a	c	c
	Star-nosed mole	3	g	a	g	c	c	t	g	g	c	g	g	g	g	g	g	c	g	c	c	c	c	c	g	g	c	g	c	g	c	c	g	g	g	c	g	c	g	t	a	t	g	g	g	c	t	c	c
Afrotheria 28	Elephant	2	g	g	g	c	c	c	g	g	c	g	g	g	c	g	g	c	g	c	c	a	c	g	g	g	c	g	c	g	g	t	g	g	g	c	g	c	g	c	c	t	g	g	g	c	g	c	c
	Cape elephant shrew	5	g	g	g	c	c	c	g	g	c	g	g	g	c	g	g	c	g	c	c	c	c	g	g	g	c	g	c	g	c	t	g	g	g	c	g	c	g	c	c	t	g	c	g	-	-	-	-
	Manatee	3	g	g	g	c	c	c	g	g	c	g	g	g	t	g	g	c	g	c	c	a	c	g	g	g	c	g	c	g	c	t	g	g	g	c	g	c	g	c	c	t	g	g	g	c	g	c	c
	Cape golden mole	5	g	g	g	c	c	c	g	g	c	g	g	g	t	g	a	c	g	c	c	a	c	g	g	g	c	g	c	g	c	t	g	g	g	c	g	c	g	c	-	t	g	g	g	c	g	c	c
	Tenrec	7	g	g	g	-	c	c	g	g	g	g	g	g	c	-	a	c	g	c	-	c	c	g	g	g	t	g	c	g	c	c	a	g	g	c	g	c	g	c	c	t	g	g	g	c	c	-	c
	Aardvark	6	g	g	g	c	c	c	g	g	c	g	g	g	c	g	g	c	g	c	c	a	c	g	g	g	c	g	c	g	c	t	g	g	g	c	g	a	g	c	c	t	g	g	g	c	g	c	c
Mammal 48	Armadillo		g	g	g	c	c	c	g	c	c	g	g	g	g	g	g	c	g	c	c	g	c	c	g	g	c	g	c	g	c	t	g	g	g	c	g	c	g	c	c	t	g	g	g	c	g	c	c
	Opossum	18	g	g	g	g	c	-	-	-	t	c	a	g	g	g	g	a	g	c	c	c	c	g	g	t	a	g	c	g	c	g	a	g	g	c	t	c	g	c	c	c	g	g	g	c	g	c	t
	Tasmanian devil	20	=	=	-	c	c	a	g	t	t	t	g	g	g	g	g	t	g	c	c	c	c	g	g	t	a	g	c	g	c	-	t	g	g	c	t	t	g	c	c	t	a	-	g	c	g	c	t
	Wallaby	9	g	g			c	a	g	t	t	t	g	g	g	g	g	=	g	c	c	c	c	g	g	t	a	g	c	g	c	g	a	g	c	c	t	t	g	c	c	c	g	g	g	c	g	c	t
	Platypus	1
Aves 294	Rock pigeon	17	=	=	=	=	=	=	=	=	=	=	=	=	=	c	g	c	g	c	t	-	a	t	-	c	t	c	c	g	c	g	g	c	t	t	g	c	a	g	=	c	a	c	g	a	g	c	c
	Saker falcon	22	g	c	=	=	=	=	=	=	=	=	=	=	=	=	=	g	g	c	t	-	t	t	c	t	t	c	c	c	c	g	g	c	a	t	g	c	a	g	c	c	a	c	g	a	g	c	c
	Peregrine falcon	22	g	c	=	=	=	=	=	=	=	=	=	=	=	=	=	g	g	c	t	-	t	t	c	t	t	c	c	c	c	g	g	c	a	t	g	c	a	g	c	c	a	c	g	a	g	c	c
	Collared flycatcher	22	g	c	=	=	=	=	=	=	=	=	=	=	=	g	g	c	g	c	t	-	c	t	c	g	t	a	a	g	c	g	t	c	c	t	g	c	a	g	c	c	a	c	g	g	c	t	c
	White-throated sparrow	20	=	=	=	=	=	=	=	=	=	=	=	=	=	g	g	c	g	c	t	-	c	t	c	c	t	a	a	g	c	g	c	-	t	c	g	t	a	g	c	c	a	c	g	g	c	t	c
	Medium ground finch	22	=	c	=	=	=	=	=	=	=	=	=	=	=	g	g	c	g	c	t	-	c	t	c	c	t	g	a	g	c	g	c	-	t	c	t	t	a	g	c	c	a	c	g	g	c	t	c
	Zebra finch	23	g	c	=	=	=	=	=	=	=	=	=	=	=	g	g	c	g	c	t	-	c	t	c	c	t	a	a	g	c	g	c	c	t	t	g	t	a	g	c	c	a	c	g	g	c	t	c
	Tibetan ground jay	23	g	c	=	=	=	=	=	=	=	=	=	=	=	g	g	c	g	a	t	-	c	t	c	c	c	a	a	g	c	g	t	c	t	c	g	t	a	g	c	c	a	c	g	g	c	t	c
	Budgerigar	21	g	c	t	c	=	=	=	=	=	=	=	=	=	c	g	c	g	c	t	-	c	t	c	g	t	t	c	g	c	g	-	c	t	t	g	c	a	g	c	=	=	c	t	a	g	t	c
	Parrot	22	g	c	=	=	=	=	=	=	=	=	=	g	t	c	g	c	g	c	t	-	c	t	c	g	t	t	c	g	c	g	=	=	t	t	g	c	a	g	g	=	=	c	t	a	g	t	c
	Scarlet macaw	20		c												c	g	c	g	c	t	-	c	t	c	g	t	t	c	g	c	g	-	c	t	t	g	c	a	g	g	=	=	c	t	a	g	t	c
	Mallard duck	22	g	c	=	=	=	=	=	=	=	=	=	=	=	c	g	c	g	c	t	-	c	t	c	c	c	c	=	g	a	g	t	c	a	t	g	c	g	g	c	-	-	c	g	a	g	t	c
	Chicken	17	=	=	a	=	=	=	=	=	=	=	=	=	=	a	g	c	g	c	t	-	c	t	c	c	t	t	t	g	c	g	t	=	t	t	g	c	a	g	c	c	a	c	g	a	t	c	c
	Turkey	21	=	c	a	=	=	=	=	=	=	=	=	=	=	=	=	c	g	c	a	-	c	t	t	c	t	t	t	g	c	g	t	=	t	t	g	c	a	=	=	=	=	c	g	a	a	t	c
Sarcopterygii 198	American alligator	24	t	c	g	c	=	=	=	=	=	=	=	g	a	=	=	c	g	c	g	-	c	t	a	c	t	a	g	g	c	g	t	c	g	c	a	c	a	a	c	c	c	c	g	c	a	a	c
	Green seaturtle	34	g	c	g	c	=	=	=	=	=	=	=	g	t	a	g	c	g	c	c	-	c	t	a	c	t	g	c	g	c	a	c	a	g	c	a	c	a	g	a	a	g	c	a	c	g	a	c
	Painted turtle	31	g	c	g	c	=	=	=	=	=	=	=	g	t	a	g	c	g	c	c	-	c	t	a	c	t	g	c	g	c	c	c	a	g	c	a	c	a	c	a	a	g	c	a	c	g	a	c
	Chinese softshell turtle	32	g	c	g	c	=	=	=	=	=	=	=	=	=	=	=	c	g	t	c	-	c	t	a	c	t	g	c	g	c	g	t	a	g	c	a	c	a	g	a	a	g	c	a	g	g	a	c
	Spiny softshell turtle	34	g	c	g	-	=	=	=	=	=	=	=	=	=	=	=	c	g	t	c	-	c	t	a	c	t	a	c	g	c	g	t	a	g	c	a	c	a	g	a	a	g	c	a	c	g	a	c
	Lizard	18	=	=	=	=	=	=	=	=	=	=	=	=	=	=	=	c	=	=	=	=	=	=	=	=	c	t	c	-	c	g	-	c	c	c	g	c	a	-	t	a	g	-	g	c	a	c	c
	X. tropicalis
	Coelacanth	25			=	=	=	=	=	=	=	=	=	=	=	g	c	c	t	c	t	g	t	a	g	g	a	g	c	-	c	g	g	a	g	a	g	-	t	c	c	c	g	g	g	c	g	c	t
Fish	Tetraodon
	Fugu
	Yellowbelly pufferfish
	Nile tilapia
	Princess of Burundi
	Burton's mouthbreeder
	Zebra mbuna
	Pundamilia nyererei
	Medaka
	Southern platyfish
	Stickleback
	Atlantic cod
	Zebrafish
	Mexican tetra (cavefish)
	Spotted gar
	Lamprey
[truncated: 125 more columns]
