# Supplementary material for: Human BRCA pathogenic variants were originated during recent human history
Source: Life Sci Alliance. 2022 Feb 14;5(5):e202101263. doi: 10.26508/lsa.202101263 (PMC8860097; doi:10.26508/lsa.202101263)
Supplement: Supplementary file 4 [file LSA-2021-01263_TableS4.xlsx]

## Sheet: All_312_shared_variants
Supplementary table 4. Human BRCA2 PLPs shared with other species
		(hg38) NC_000013.11	g.32319282C>A	g.32319326G>A	g.32319330G>A	g.32326148C>A	g.32326150G>A	g.32326151G>A	g.32326241G>A	g.32326613G>A	g.32331031G>A	g.32332501T>A	g.32332575T>A	g.32332581C>A	g.32332657T>A	g.32332662G>A	g.32332663G>A	g.32333167G>A	g.32333310C>A	g.32336506T>A	g.32336569T>A	g.32336731C>A	g.32336821T>A	g.32337006C>A	g.32337103T>A	g.32337333G>A	g.32337334G>A	g.32337627T>A	g.32337760C>A	g.32337810T>A	g.32337955T>A	g.32338134T>A	g.32338140C>A	g.32338225C>A	g.32338236T>A	g.32338294C>A	g.32338356T>A	g.32338377C>A	g.32338552T>A	g.32338566C>A	g.32338581T>A	g.32338680C>A	g.32338752T>A	g.32339044G>A	g.32339062C>A	g.32339244C>A	g.32339259T>A	g.32339317T>A	g.32339320C>A
		ClinVar Allele ID	66002	46378	66077	261013	66379	66376	46478	66726	67105	261050	811348	65732	434958	261056	260040	65843	46320	234687	97248	65942	840684	248940	66004	131539	46368	408890	234749	234752	641729	565985	811492	484585	66219	66237	66248	424738	948318	463042	372710	66301	261239	248973	241682	66399	248976	360713	66418
		Species with mutation Number of shared variants	1	3	4	2	2	1	3	1	2	4	1	1	1	2	1	1	1	16	1	1	1	7	6	6	20	17	1	1	1	14	1	5	7	2	9	8	7	2	7	1	1	12	20	1	3	20	2
Primate 8	Human (Alt)		a	a	a	a	a	a	a	a	a	a	a	a	a	a	a	a	a	a	a	a	a	a	a	a	a	a	a	a	a	a	a	a	a	a	a	a	a	a	a	a	a	a	a	a	a	a	a
	Human (Ref hg38)		c	g	g	c	g	g	g	g	g	t	t	c	t	g	g	g	c	t	t	c	t	c	t	g	g	t	c	t	t	t	c	c	t	c	t	c	t	c	t	c	t	g	c	c	t	t	c
	Chimp		c	g	g	c	g	g	g	g	g	t	t	c	t	g	g	g	c	t	t	c	t	c	t	g	g	t	c	t	t	t	c	c	t	c	t	c	t	c	t	c	t	g	c	c	t	t	c
	Gorilla		c	g	g	c	g	g	g	g	g	t	t	c	t	g	g	g	c	t	t	c	t	c	t	g	g	t	c	t	t	t	c	c	t	c	t	c	t	c	t	c	t	g	c	c	t	t	c
	Orangutan		c	g	g	c	g	g	g	g	g	t	t	c	t	g	g	g	c	t	t	c	t	t	t	c	g	t	c	t	t	t	c	c	t	c	t	c	t	c	t	c	t	g	c	c	t	t	c
	Gibbon		c	g	g	c	g	g	g	g	g	t	t	c	t	g	g	g	c	t	t	c	t	c	t	g	g	t	c	t	t	t	c	c	t	c	t	c	t	c	t	c	t	g	c	c	t	t	c
	Rhesus		c	g	g	c	g	g	g	g	g	t	t	c	c	g	g	g	c	t	t	c	t	c	t	g	g	c	c	t	t	t	c	c	t	c	t	c	t	c	t	c	t	g	c	c	t	t	c
	Crab-eating macaque		c	g	g	c	g	g	g	g	g	t	t	c	c	g	g	g	c	t	t	c	t	c	t	g	g	c	c	t	t	t	c	c	t	c	t	c	t	c	t	c	t	g	c	c	t	t	c
	Baboon		c	g	g	c	g	g	g	g	g	t	t	c	c	g	g	g	c	t	t	c	t	c	t	g	g	c	c	t	t	t	c	c	t	c	t	c	t	c	t	c	t	g	c	c	t	t	c
	Green monkey		c	g	g	c	g	g	g	g	g	t	t	c	c	g	g	g	c	t	t	c	t	c	t	g	g	c	c	t	t	t	c	c	t	c	t	c	t	c	t	c	t	g	c	c	t	t	c
	Marmoset	1	t	g	g	c	g	g	g	g	g	t	t	c	t	g	g	g	c	t	t	c	c	c	t	g	g	t	c	t	t	t	c	c	t	c	t	c	t	c	t	c	t	g	c	c	t	t	c
	Squirrel monkey	2	c	g	g	N	N	N	N	N	g	N	N	N	N	N	N	g	c	N	N	N	N	N	N	N	N	N	N	N	N	N	N	N	N	N	N	N	N	N	N	c	t	a	c	c	t	t	c
	Bushbaby	5	c	g	g	c	g	g	g	g	g	t	t	c	t	g	g	g	c	t	t	t	t	a	t	a	g	t	c	t	t	t	c	c	t	t	t	c	t	c	t	c	t	a	c	c	t	c	c
Euarchontoglires 101	Chinese tree shrew	3	t	g	g	c	g	g	g	g	g	t	t	c	t	g	g	g	c	t	t	t	t	c	t	g	g	c	t	t	t	t	c	c	t	t	t	c	t	c	t	c	t	g	t	c	t	t	t
	Squirrel	7	-	g	g	c	g	g	g	g	g	t	t	c	t	a	g	g	t	t	t	c	t	c	t	g	g	t	a	t	t	t	c	c	t	c	t	c	t	t	t	c	t	c	c	t	t	t	a
	Lesser Egyptian jerboa	11	c	=	=	c	g	g	a	g	g	t	t	c	t	g	g	c	c	t	c	t	t	c	t	g	g	t	c	t	t	t	c	c	t	c	t	-	t	c	t	c	t	g	g	c	t	t	c
	Prairie vole	11	c	a	a	=	=	=	g	g	g	t	t	c	t	g	g	g	c	t	t	t	c	c	t	g	t	t	t	t	t	t	c	c	t	t	t	c	c	c	t	c	t	g	c	c	c	c	c
	Chinese hamster	7	c	g	a	c	g	g	g	g	g	t	t	c	t	g	g	g	c	t	t	t	c	c	t	g	g	t	t	t	t	t	c	c	t	t	t	c	c	c	t	c	t	g	c	c	c	c	c
	Golden hamster	5	=	=	=	=	=	=	=	=	g	t	t	c	t	g	g	g	c	t	t	t	c	c	t	g	g	t	t	t	t	t	c	c	t	t	t	c	c	c	t	c	t	g	c	c	c	c	c
	Mouse	6	c	g	a	=	=	=	g	g	g	c	t	c	t	g	g	g	t	t	t	t	t	c	c	g	g	t	c	t	t	t	c	c	t	c	t	c	-	c	t	c	t	a	c	c	c	c	t
	Rat	10	c	g	a	c	g	g	g	g	g	t	t	c	t	g	g	g	c	t	t	t	t	c	c	g	g	t	c	t	t	t	c	c	t	t	t	c	t	c	t	c	t	a	c	c	c	c	t
	Naked mole-rat	8	c	g	g	c	g	g	g	g	g	a	t	c	t	g	g	g	g	t	t	c	t	c	t	g	g	t	c	t	t	t	c	c	t	c	t	c	t	c	t	c	t	a	c	c	t	-	c
	Guinea pig	8	c	g	c	c	g	g	g	g	g	a	t	c	t	g	g	g	c	g	t	c	t	c	t	t	g	t	c	t	t	t	c	c	t	c	t	c	t	c	t	c	t	a	c	c	t	c	c
	Chinchilla	10	c	a	c	c	g	g	g	g	g	a	t	c	t	g	g	g	a	t	t	t	t	c	t	t	g	t	c	t	t	t	c	c	t	t	t	c	t	c	t	c	t	t	c	c	t	t	c
	Brush-tailed rat	7	c	g	c	c	g	g	g	g	g	a	t	c	t	g	g	g	c	t	t	c	t	t	t	t	g	t	c	c	t	t	c	c	t	c	t	c	t	c	t	c	t	a	c	c	c	t	c
	Rabbit	3	c	g	g	c	g	g	g	g	g	t	t	c	t	g	g	g	c	t	t	c	g	c	t	g	g	t	t	t	c	t	c	c	c	t	t	c	t	c	t	c	t	a	t	-	t	t	c
	Pika	5	c	a	g	c	g	g	g	g	g	t	t	c	t	c	g	t	t	-	t	c	g	t	t	g	g	c	t	t	c	t	c	c	t	c	t	c	t	t	t	c	t	g	t	-	c	t	c
Laurasiatheria 122	Pig	3	c	g	-						g	t	t	c	t	g	g	g	c	t	t	t	t	c	c	g	g	t	c	t	t	t	c	c	t	c	t	c	t	c	c	c	t	g	c	c	t	t	c
	Alpaca	3	c	g	g	c	g	g	g	g	g	t	t	c	t	g	g	g	c	t	t	t	t	c	c	g	g	t	c	t	t	t	t	c	t	c	t	c	t	c	c	c	t	g	c	c	t	t	t
	Bactrian camel	3	c	g	g	c	g	g	g	g	g	t	t	c	t	g	g	g	c	t	t	t	t	c	t	g	g	t	c	t	t	t	t	c	t	c	t	c	t	c	c	c	t	g	c	c	t	t	t
	Dolphin	3	c	g	g	c	g	g	g	g	g	t	t	c	t	g	g	g	c	t	t	t	t	c	t	g	g	t	c	t	t	t	c	c	t	c	t	c	t	c	c	c	t	g	c	c	t	t	t
	Killer whale	2	c	g	g	c	g	g	g	g	g	t	t	c	t	g	g	g	c	t	t	t	t	c	t	g	g	t	c	t	t	t	c	c	t	c	t	c	t	c	c	c	t	g	c	c	t	t	t
	Tibetan antelope	3	c	g	g	c	g	g	g	g	g	t	t	c	t	g	g	g	c	t	t	t	t	c	t	g	g	t	c	t	t	t	c	c	t	c	t	c	-	c	c	c	t	g	a	c	t	t	c
	Cow	2	c	g	g	c	g	g	g	g	g	t	t	c	t	g	g	g	c	t	t	t	t	c	t	g	g	t	c	t	t	t	c	c	t	c	t	c	-	c	c	c	t	g	c	c	t	t	c
	Sheep	2	c	g	g	c	g	g	g	g	g	t	t	c	t	g	g	g	c	t	t	t	t	c	t	g	g	t	c	c	t	t	c	c	t	c	t	c	-	c	c	c	t	g	c	c	t	t	c
	Domestic goat	4	c	g	g	c	g	g	g	g	g	t	t	c	t	g	g	g	c	t	t	t	t	c	t	g	g	t	c	c	t	t	c	c	a	c	t	c	-	c	c	c	t	g	c	c	t	t	c
	Horse	3	t	g	g	t	g	g	g	g	g	t	t	c	t	g	g	g	c	t	t	t	t	c	t	g	g	t	c	t	t	t	t	c	t	c	t	c	t	c	t	c	t	g	c	c	t	t	t
	White rhinoceros	4	c	g	g	c	g	g	g	g	g	t	t	c	t	g	g	g	c	t	t	t	t	c	t	g	g	t	c	t	t	t	t	c	t	c	t	c	t	c	t	c	t	g	c	c	t	t	t
	Cat	3	c	g	g	c	g	g	g	g	g	t	t	c	t	c	g	g	c	t	c	t	t	c	t	g	g	t	c	c	t	t	c	c	t	c	t	c	t	c	t	c	t	g	c	c	t	t	t
	Dog	5	c	g	g	c	g	g	g	g	g	t	t	g	t	g	t	g	c	g	t	t	t	c	t	g	g	t	c	t	t	t	c	c	t	c	c	c	t	c	t	c	t	g	c	c	a	g	t
	Ferret	4	c	g	g	c	g	g	g	g	g	t	t	g	t	g	g	g	t	t	t	t	t	c	t	g	g	c	c	t	t	t	c	c	t	c	t	c	t	c	t	c	t	g	c	c	t	t	t
	Panda	3	c	g	g	c	g	g	g	g	g	t	t	g	g	g	g	g	c	t	t	t	t	c	t	g	g	t	c	t	t	t	c	c	t	c	t	c	t	c	t	c	t	g	c	c	t	t	t
	Pacific walrus	4	c	g	g	c	g	g	g	g	g	t	t	g	t	g	g	g	c	t	t	t	t	c	t	g	g	-	c	t	t	t	c	c	t	c	t	c	t	c	t	c	t	g	c	c	t	t	t
	Weddell seal	3	N	N	N	N	N	N	N	N	N	N	N	N	N	N	N	N	N	t	t	t	t	c	t	g	g	-	c	t	t	t	c	c	t	c	t	c	t	c	t	c	t	g	c	c	t	t	t
	Black flying-fox	8	c	g	g	c	g	g	g	g	g	t	t	c	t	g	g	g	c	t	t	t	t	a	t	g	g	t	c	t	t	t	c	c	a	c	t	c	t	c	t	c	t	t	c	c	t	t	c
	Megabat	6	c	=	=	c	g	g	g	g	g	t	t	c	t	g	g	g	c	t	t	t	t	a	t	g	g	t	c	t	t	t	c	c	a	c	t	c	t	c	t	c	t	t	c	c	t	t	c
	Big brown bat	9	t	g	g	c	g	g	g	g	g	t	t	c	t	g	g	t	c	t	t	t	t	a	t	g	g	t	c	t	t	t	c	c	a	g	t	t	t	c	t	c	t	a	c	c	t	t	c
	David's myotis (bat)	8	t	g	g	c	g	g	g	g	g	t	t	c	t	g	g	t	c	t	t	t	t	a	t	g	g	c	c	t	t	t	c	c	a	g	t	t	t	c	t	c	t	g	c	c	t	t	c
	Microbat	8	t	g	-	c	g	g	g	g	g	t	t	c	t	g	g	t	c	t	t	t	t	a	t	g	g	c	c	t	t	t	c	c	a	g	t	t	t	c	t	c	t	g	c	c	t	t	c
	Hedgehog	12	c	g	g	c	a	g	g	g	g	t	t	c	t	g	g	a	c	t	t	t	t	c	t	a	g	t	c	t	t	t	c	-	t	c	t	c	t	c	t	c	t	a	g	c	c	-	-
	Shrew	9	c	g	g	c	g	g	g	g	g	t	c	c	t	g	a	g	c	t	t	t	t	c	t	a	a	t	t	c	c	t	c	c	t	c	t	c	t	c	t	c	t	a	t	c	t	t	t
	Star-nosed mole	8	c	g	g	c	g	g	g	g	g	t	t	c	t	a	g	g	c	t	t	t	t	c	t	g	a	t	c	t	c	t	c	t	t	t	t	c	t	c	c	c	t	c	c	c	t	-	t
Afrotheria 83	Elephant	14	c	=	=	c	g	g	g	g	-	t	t	c	t	g	g	c	c	t	t	t	t	c	t	g	a	t	c	t	t	c	g	c	t	t	t	c	t	c	c	c	t	g	g	c	c	t	c
	Cape elephant shrew	25	t	=	=	c	g	g	g	g	g	t	t	g	g	g	g	c	c	t	c	g	t	c	t	a	a	t	t	t	t	t	c	c	t	c	t	c	g	c	t	c	t	-	g	c	t	t	c
	Manatee	6	c	=	=	c	g	g	g	g	N	t	t	g	t	g	g	c	c	t	t	t	t	c	t	g	t	t	c	t	t	t	c	c	t	c	t	c	t	c	c	c	t	g	g	c	t	t	c
	Cape golden mole	17	c	=	=	c	g	g	g	g	g	t	t	c	t	g	g	c	c	t	g	g	t	c	a	a	t	t	c	c	t	t	c	c	t	c	c	t	t	c	c	c	t	g	a	c	t	t	c
	Tenrec	14	c	=	=	c	g	g	g	g	g	t	g	t	g	g	g	c	c	t	t	g	c	c	t	g	t	t	c	c	t	t	c	c	t	g	c	c	t	a	c	c	t	g	g	c	t	t	c
	Aardvark	7	c	=	=	c	g	g	g	g	g	t	t	c	c	g	c	c	c	t	g	t	t	c	t	g	t	c	c	t	t	t	c	c	t	c	t	c	t	c	c	c	t	g	g	c	t	c	c
Mammal 71	Armadillo	3	c	g	g	c	g	g	g	g	g	t	t	c	t	g	g	t	c	t	t	t	t	c	t	g	g	t	c	t	t	t	c	c	t	c	t	c	t	c	t	c	t	g	g	c	t	t	c
	Opossum	16	t	g	g	c	g	g	g	g	g	t	t	c	t	g	g	t	t	c	c	c	g	a	c	g	g	t	t	t	t	g	t	-	c	c	t	c	t	g	t	c	t	g	a	c	t	t	t
	Tasmanian devil	17	t	g	g	c	g	g	g	g	g	t	c	c	a	g	g	t	t	c	-	t	c	c	t	g	g	t	t	t	t	g	t	t	c	c	t	c	t	g	t	c	t	g	a	c	t	t	t
	Wallaby	17				c	g	g	g	g		t	c	c	t	g	g	=	=	c	c	c	a	c	t	g	a	t	t	t	t	a	t	t	c	t	t	c	t	g	t	c	c	g	a	c	t	t	t
	Platypus	18	c	g	g	c	g	g	g	g	=	t	t	c	t	g	g	g	c	t	t	t	g	-	c	g	g	t	c	c	t	t	c	c	c	g	t	g	t	c	t	c	t	g	a	c	t	a	t
Aves 604	Rock pigeon	44	t	g	g	c	g	g	g	g	g	c	t	c	c	g	g	-	c	a	a	t	t	c	t	c	a	=	c	t	-	a	c	a	g	c	-	c	t	c	t	c	-	-	a	-	t	a	t
	Saker falcon	46	t	g	g	c	g	g	g	g	=	g	t	c	c	g	g	-	c	a	t	t	t	c	t	c	a	a	c	t	-	a	c	a	g	c	-	c	t	c	t	c	-	-	a	-	t	a	t
	Peregrine falcon	45	t	g	g	c	g	g	g	g	=	g	t	c	c	g	g	-	c	a	t	t	t	c	t	c	a	a	c	t	-	a	c	a	g	c	-	c	t	c	t	c	-	-	a	-	t	a	t
	Collared flycatcher	42	-	g	g	c	g	g	g	g	g	c	c	a	c	g	g	-	c	=	=	=	=	=	=	c	a	a	c	t	-	a	c	-	t	c	a	t	c	c	a	t	-	-	a	-	g	a	t
	White-throated sparrow	42	t	g	g	c	g	g	g	g	g	c	t	c	c	g	g	-	c	=	=	=	=	=	=	c	a	a	c	t	-	a	c	g	t	g	a	c	c	c	a	=	-	-	a	-	c	a	t
	Medium ground finch	48	t	g	g	c	g	g	g	g	g	c	t	t	c	g	g	-	c	a	c	t	g	c	=	c	a	a	c	t	-	g	c	g	t	c	a	c	c	c	a	c	-	-	a	-	t	a	c
	Zebra finch	47	t	g	g	c	g	g	g	g	a	c	t	t	c	g	g	-	c	a	c	=	=	=	=	c	a	a	t	t	-	a	c	a	t	c	a	c	c	c	a	c	-	-	a	-	-	a	t
	Tibetan ground jay	40	t	g	g	c	g	g	g	g	=	c	t	c	c	g	g	-	c	=	=	=	=	=	=	c	a	a	t	t	-	a	c	g	t	c	a	g	c	c	a	c	-	-	a	-	c	a	c
	Budgerigar	50	t	g	g	c	g	g	g	g	=	c	t	c	c	g	g	-	c	a	c	t	t	c	t	c	a	a	c	t	-	a	t	g	t	c	a	a	a	c	t	c	-	-	a	-	t	a	t
	Parrot	44	t	g	g	c	g	g	g	g	g	c	t	t	c	g	g	-	c	a	c	=	t	c	t	c	a	a	c	t	-	a	t	g	t	c	a	a	a	t	t	c	-	-	a	-	t	a	t
	Scarlet macaw	38																		a	c	t	t	c	t	c	a	a	c	t	-	a	t	g	t	c	a	a	a	t	t	c	-	-	a	-	t	a	t
	Mallard duck	42	t	g	g	a	a	a	a	g	=	c	t	c	c	g	g	-	c	a	c	t	t	t	t	c	a	a	c	t	-	g	c	c	t	-	g	a	t	c	t	c	-	-	c	-	t	a	t
	Chicken	37	t	g	g	c	g	g	g	g	g	c	t	t	c	g	g	-	c	a	c	t	t	c	t	c	a	t	c	t	-	g	c	=	=	c	g	-	t	c	t	=	=	-	-	-	t	a	t
	Turkey	39	t	g	g	c	g	g	g	g	g	c	t	t	c	g	g	-	c	a	t	t	t	c	t	c	a	t	c	t	-	g	c	c	t	-	g	a	t	c	t	c	-	-	-	-	t	t	t
Sarcopterygii 329	American alligator	36	t	g	g	=	=	=	=	g	=	t	t	t	c	g	g	-	c	a	c	t	t	c	t	g	g	a	c	c	t	g	c	-	c	t	a	a	t	t	t	t	-	g	a	-	t	t	t
	Green seaturtle	41	g	g	g	c	g	g	g	g	g	t	t	t	g	g	g	-	c	a	c	t	t	c	a	g	g	a	t	t	t	g	g	-	t	g	g	t	a	c	t	c	-	g	a	-	t	a	t
	Painted turtle	39	g	g	g	c	g	g	g	g	g	t	t	t	c	g	g	-	c	a	c	t	t	c	a	g	g	a	t	t	t	g	c	-	t	g	g	t	a	c	t	c	-	g	a	-	t	a	t
	Chinese softshell turtle	43	g	g	g	c	g	g	g	g	=	t	t	t	t	g	g	-	c	a	c	t	t	c	a	g	g	a	t	t	t	a	c	-	t	g	g	t	a	c	-	c	-	g	-	-	t	a	t
	Spiny softshell turtle	40	g	g	g	c	g	g	g	g		t	t	t	t	g	g	-	c	a	c	t	t	c	g	g	g	a	t	t	t	a	c	-	t	g	g	t	a	c	t	c	-	g	-	-	t	a	t
	Lizard	57	a	g	g	-	g	g	a	g	a	=	=	=	=	=	=	=	=	=	=	a	t	t	a	a	a	a	t	-	c	a	c	-	c	a	c	a	t	c	t	t	-	c	g	-	t	a	a
	X. tropicalis	30	t	g	-	c	g	g	g	a	=	=	=	=	=	=	=	=	=	=	=	-	t	=	t	g	t	-	t	a	c	-	-	g	g	c	t	-	t	c	c	c	t	-	-	-	-	a	c
	Coelacanth	43	-	g	g	a	g	g	c	t	=	t	a	c	t	g	g	=	=	=	=	=	=	=	a	c	t	c	c	t	g	t	g	g	g	a	t	a	c	t	g	c	a	a	t	a	a	t	c
Fish 127	Tetraodon	22	=	=	=	=	=	=	=	=	=	=	=	=	=	=	=	=	=	=	=	=	=	=	=	=	=	=	c	t	a	g	a	a	a	c	c	c	-	a	a	a	t	=	=	=	=	=	=
	Fugu	5	=	=	=	=	=	=	=	=	=	=	=	=	=	=	=	=	=	=	=	=	=	=	=	=	=	=	=	=	=	=	=	=	=	=	=	=	=	=	=	=	=	=	=	=	=	=	=
	Yellowbelly pufferfish	5	=	=	=	=	=	=	=	=	=	=	=	=	=	=	=	=	=	=	=	=	=	=	=	=	=	=	=	=	=	=	=	=	=	=	=	=	=	=	=	=	=	=	=	=	=	=	=
	Nile tilapia	8	=	=	=	=	=	=	=	=	=	=	=	=	=	=	=	=	=	=	=	=	=	=	=	=	=	=	=	=	=	=	=	=	=	=	=	=	=	=	=	=	=	=	=	=	=	=	=
	Princess of Burundi	7	=	=	=	=	=	=	=	=	=	=	=	=	=	=	=	=	=	=	=	=	=	=	=	=	=	=	=	=	=	=	=	=	=	=	=	=	=	=	=	=	=	=	=	=	=	=	=
	Burton's mouthbreeder	8	=	=	=	=	=	=	=	=	=	=	=	=	=	=	=	=	=	=	=	=	=	=	=	=	=	=	=	=	=	=	=	=	=	=	=	=	=	=	=	=	=	=	=	=	=	=	=
	Zebra mbuna	8	=	=	=	=	=	=	=	=	=	=	=	=	=	=	=	=	=	=	=	=	=	=	=	=	=	=	=	=	=	=	=	=	=	=	=	=	=	=	=	=	=	=	=	=	=	=	=
	Pundamilia nyererei	8	=	=	=	=	=	=	=	=	=	=	=	=	=	=	=	=	=	=	=	=	=	=	=	=	=	=	=	=	=	=	=	=	=	=	=	=	=	=	=	=	=	=	=	=	=	=	=
	Medaka	6	=	=	=	=	=	=	=	=	=	=	=	=	=	=	=	=	=	=	=	=	=	=	=	=	=	=	=	=	=	=	=	=	=	=	=	=	=	=	=	=	=	=	=	=	=	=	=
	Southern platyfish	7	=	=	=	=	=	=	=	=	=	=	=	=	=	=	=	=	=	=	=	=	=	=	=	=	=	=	=	=	=	=	=	=	=	=	=	=	=	=	=	=	=	=	=	=	=	=	=
	Stickleback	6	=	=	=	=	=	=	=	=	=	=	=	=	=	=	=	=	=	=	=	=	=	=	=	=	=	=	=	=	=	=	=	=	=	=	=	=	=	=	=	=	=	=	=	=	=	=	=
	Atlantic cod	4
	Zebrafish	25	=	=	=	=	=	=	=	=	=	=	=	=	=	=	=	=	=	=	=	=	=	=	=	=	=	=	=	=	=	=	=	=	=	=	=	=	-	c	a	t	t	t	c	c	a	t	t
	Mexican tetra (cavefish)	3	=	=	=	=	=	=	=	=	=	=	=	=	=	=	=	=	=	=	=	=	=	=	=	=	=	=	=	=	=	=	=	=	=	=	=	=	=	=	=	=	=	=	=	=	=	=	=
	Spotted gar	5	=	=	=	=	=	=	=	=	=	=	=	=	=	=	=	=	=	=	=	=	=	=	=	=	=	=	=	=	=	=	=	=	=	=	=	=	=	=	=	=	=	=	=	=	=	=	=
	Lamprey
[truncated: 265 more columns]
